# Supplementary material for: Probing Liver Injuries Induced by Thioacetamide in Human In Vitro Pooled Hepatocyte Experiments
Source: MDPI journal article supplement (doi:10.3390/ijms25063265), 2024-03-13
Supplement: s1 [file s1]

## Supplementary Material

### Probing liver injury induced by thioacetamide in human *in vitro* pooled hepatocyte experiments

Himanshu Goel<sup>1,2\*</sup>, Richard L. Printz<sup>3,4\*</sup>, Venkat R. Pannala<sup>1,2</sup>, Mohamed Diwan  
M. AbdulHameed<sup>1,2</sup>, and Anders Wallqvist<sup>1\*</sup>

<sup>1</sup>*Department of Defense Biotechnology High Performance Computing Software Applications Institute,  
Telemedicine and Advanced Technology Research Center, U.S. Army Medical Research and Development  
Command, Fort Detrick, MD, USA*

<sup>2</sup>*The Henry M. Jackson Foundation for the Advancement of Military Medicine, Inc., Bethesda, MD, USA*

<sup>3</sup>*Department of Molecular Physiology and Biophysics, Vanderbilt University School of Medicine,  
Nashville, TN, USA*

<sup>4</sup>*Division of Diabetes, Endocrinology, and Metabolism, Department of Medicine, Vanderbilt University  
Medical Center, Nashville, TN, USA*

**\*Correspondence:**

Dr. Himanshu Goel; Telephone: (301) 619-1976; E-mail: [hgoel@bhsai.org](mailto:hgoel@bhsai.org)

Dr. Richard L. Printz; Telephone: (615) 343-0526; E-mail: [r.printz@vumc.org](mailto:r.printz@vumc.org)

Dr. Anders Wallqvist; Telephone: (301) 619-1989; E-mail: [sven.a.wallqvist.civ@health.mil](mailto:sven.a.wallqvist.civ@health.mil)

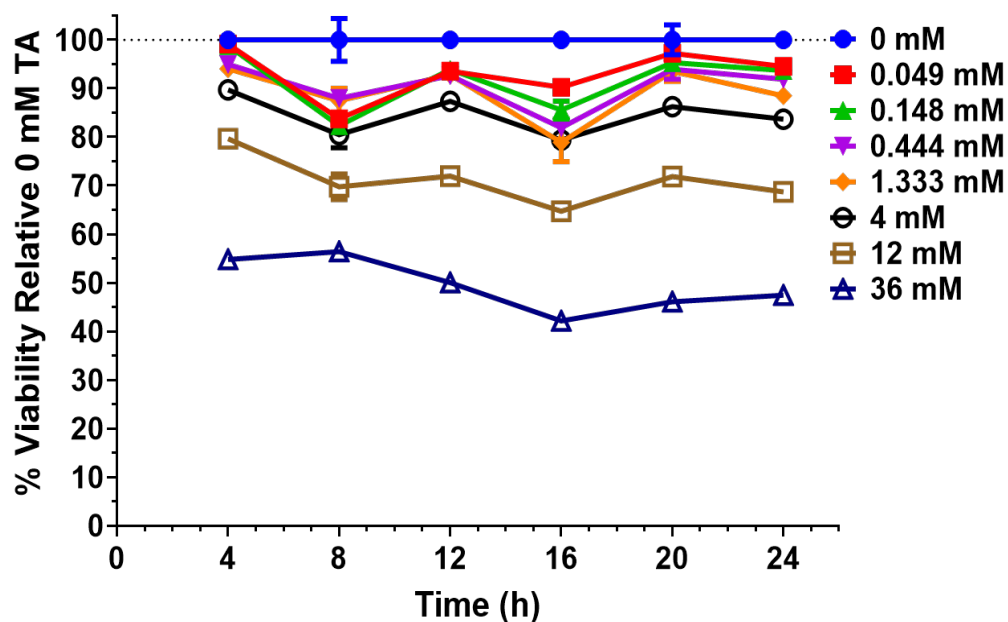

**Figure S1.** Time-course study to determine the length of thioacetamide (TA) exposure needed to cause detectable cell injury in pooled human hepatocytes. Hepatocytes were cultured in 96-well collagen 1-coated plates (Corning, Tewksbury, MA, USA) following the protocols and using the culture reagents provided by the supplier, Sekisui XenoTech (Kansas City, KS, USA). Cell viability was monitored by quantifying intracellular ATP levels using the CellTiter-Glo 2.0 kit (Promega, Madison, WI, USA) after exposure to various doses of thioacetamide.

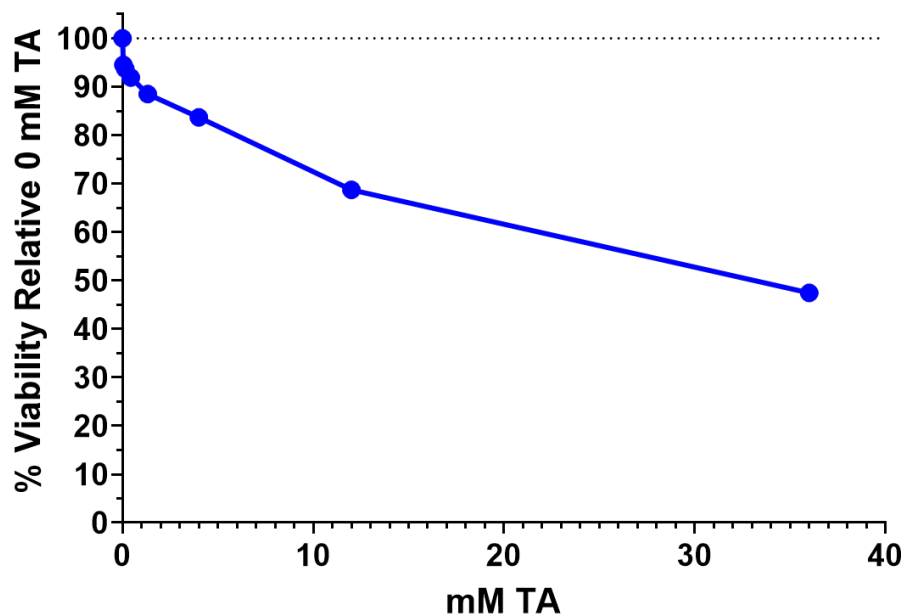

**Figure S2.** Analysis of pooled human hepatocyte cell viability by quantifying intracellular ATP levels after 24 hours of exposure to various doses of thioacetamide (TA).

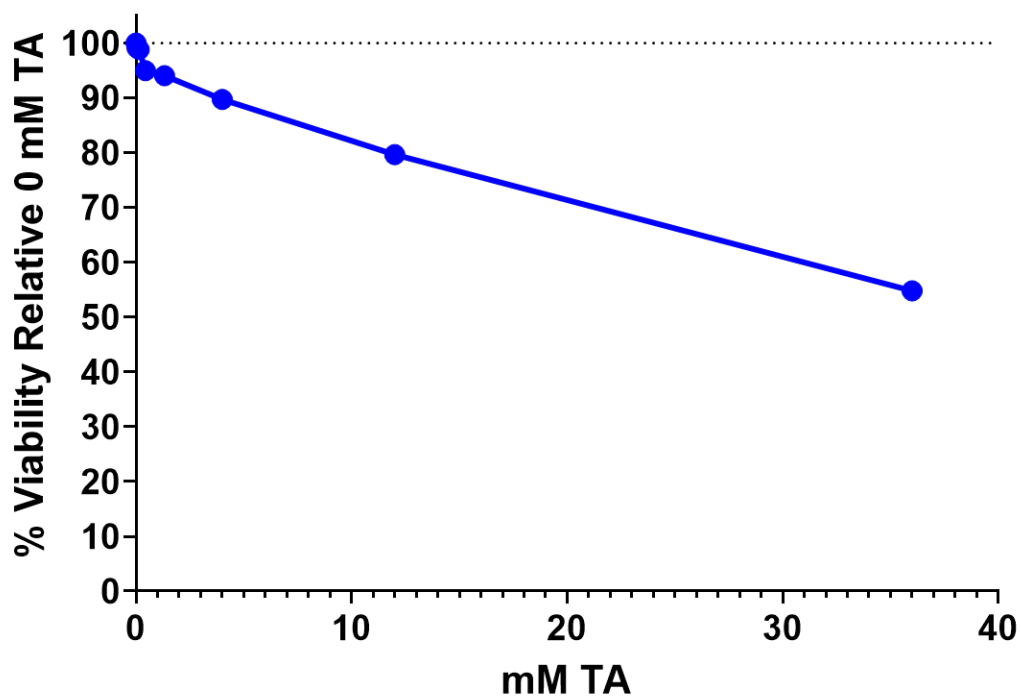

**Figure S3.** Analysis of pooled human hepatocyte cell viability by quantifying intracellular ATP levels after 4 hours of exposure to various doses of thioacetamide (TA).

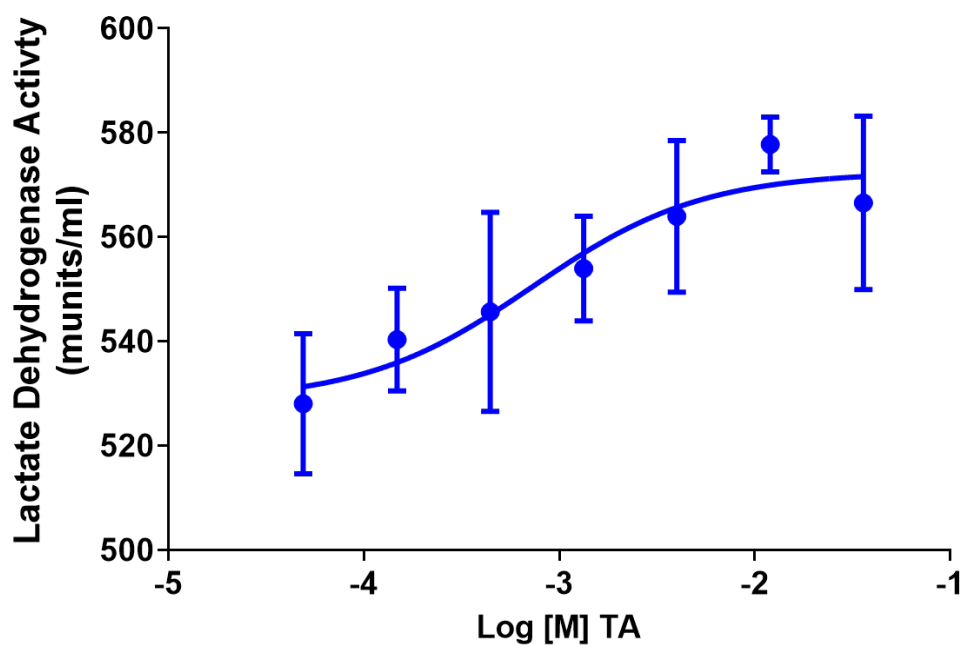

**Figure S4.** Analysis of pooled human hepatocyte cell viability by quantifying lactate dehydrogenase activity released into the medium as a marker of cell membrane integrity after 24

hours of exposure to various doses of thioacetamide (TA). Activity was quantified using a Lactate Dehydrogenase Activity Assay Kit (MilliporeSigma, Burlington, MA, USA).

| Donor Number | Age  | Gender | BMI  | Race               | Cause of Death | CMV (+/-) | Diabetes    | Smoker (Y/N) | Lot #   | Cat #   |
|--------------|------|--------|------|--------------------|----------------|-----------|-------------|--------------|---------|---------|
| H1220        | 28   | M      | 23.1 | Asian              | Anoxia         | +         | none        | Y            | 2210146 | HPCH10+ |
| H1236        | 74   | M      | 27   | Caucasian          | Head trauma    | -         | none        | Y            | 2210146 | HPCH10+ |
| H1382        | 57   | M      | 27.8 | Caucasian          | Anoxia         | -         | none        | N            | 2210146 | HPCH10+ |
| H1401        | 48   | M      | 22.1 | African American   | Anoxia         | +         | none        | N            | 2210146 | HPCH10+ |
| H1417        | 46   | F      | 37.5 | African American   | CVA            | +         | none        | N            | 2210146 | HPCH10+ |
| H1418        | 51   | F      | 30.8 | African American   | Anoxia         | -         | none        | Y            | 2210146 | HPCH10+ |
| H1453        | 48   | F      | 37.7 | Caucasian          | Anoxia         | -         | Insididus   | N            | 2210146 | HPCH10+ |
| H1460        | 40   | F      | 38.1 | Caucasian          | Anoxia         | -         | none        | N            | 2210146 | HPCH10+ |
| H1467        | 52   | F      | 31.1 | Caucasian          | Anoxia         | -         | none        | N            | 2210146 | HPCH10+ |
| H1474        | 64   | M      | 19.4 | Asian              | CVA            | +         | none        | N            | 2210146 | HPCH10+ |
| H1428        | 53   | F      | 28.6 | Caucasian          | Anoxia         | -         | none        | Y            | 2010236 | HPCH10+ |
| H1439        | 67   | F      | 20.5 | Caucasian          | CVA            | +         | none        | N            | 2010236 | HPCH10+ |
| H1441        | 37   | M      | 26.4 | Caucasian          | Anoxia         | -         | none        | N            | 2010236 | HPCH10+ |
| H1442        | 66   | F      | 21.8 | Caucasian          | Head trauma    | -         | none        | N            | 2010236 | HPCH10+ |
| H1443        | 53   | M      | 37.9 | Caucasian          | CVA            | -         | none        | N            | 2010236 | HPCH10+ |
| H1444        | 50   | F      | 22.8 | Caucasian          | Head trauma    | +         | none        | Y            | 2010236 | HPCH10+ |
| H1445        | 16   | F      | 23.8 | Caucasian          | CVA            | +         | none        | N            | 2010236 | HPCH10+ |
| H1447        | 10   | M      | 22.2 | Hispanic           | Head trauma    | +         | none        | N            | 2010236 | HPCH10+ |
| H1448        | 66   | M      | 40   | Caucasian          | Head trauma    | +         | none        | N            | 2010236 | HPCH10+ |
| H1449        | 61   | M      | 34.8 | Caucasian          | Head trauma    | +         | none        | N            | 2010236 | HPCH10+ |
| H1205        | 57   | M      | 23.5 | Caucasian          | CVA            | +         | none        | N            | 1810050 | HPCH10+ |
| H1211        | 9    | F      | 18.6 | Caucasian          | Anoxia         | -         | none        | N            | 1810050 | HPCH10+ |
| H1254        | 62   | F      | 32.8 | Caucasian          | CVA            | -         | none        | N            | 1810050 | HPCH10+ |
| H1295        | 45   | M      | 29.8 | Caucasian          | Anoxia         | -         | none        | N            | 1810050 | HPCH10+ |
| H1296        | 46   | M      | 21.1 | Caucasian          | Anoxia         | -         | none        | N            | 1810050 | HPCH10+ |
| H1308        | 32   | F      | 32.2 | Caucasian          | Anoxia         | -         | type 2      | N            | 1810050 | HPCH10+ |
| H1329        | 42   | M      | 29   | Caucasian          | Head trauma    | +         | none        | N            | 1810050 | HPCH10+ |
| H1358        | 57   | F      | 29   | Caucasian          | CVA            | -         | none        | N            | 1810050 | HPCH10+ |
| H1361        | 46   | M      | 31.3 | Caucasian          | Anoxia         | +         | none        | N            | 1810050 | HPCH10+ |
| H1366        | 55   | F      | 32   | Caucasian          | CVA            | +         | none        | Y            | 1810050 | HPCH10+ |
| H1207        | 42   | F      | 25   | Asian              | CVA            | +         | none        | N            | 1810126 | HPCH05+ |
| H1219        | 24   | F      | 26.5 | Caucasian          | Trauma         | +         | none        | Y            | 1810126 | HPCH05+ |
| H1229        | 41   | M      | 34.2 | African American   | CVA            | +         | unknown     | N            | 1810126 | HPCH05+ |
| H1252        | 57   | F      | 29.7 | Caucasian          | CVA            | +         | none        | Y            | 1810126 | HPCH05+ |
| H1371        | 26   | M      | 26.1 | Caucasian          | Head trauma    | -         | none        | N            | 1810126 | HPCH05+ |
| H1408        | 19   | F      | 29.5 | Caucasian          | Head trauma    | +         | none        | N            | 2110283 | HPCH05+ |
| H1419        | 21   | M      | 20.7 | Caucasian          | Head trauma    | +         | none        | N            | 2110283 | HPCH05+ |
| H1442        | 66   | F      | 21.8 | Caucasian          | Head trauma    | -         | none        | N            | 2110283 | HPCH05+ |
| H1462        | 59   | F      | 19.4 | Caucasian          | Anoxia         | +         | type 2      | N            | 2110283 | HPCH05+ |
| H1463        | 57   | M      | 33.7 | Caucasian          | CVA            | -         | none        | N            | 2110283 | HPCH05+ |
| AVG Age      | 46.3 | 40 T   | 28.0 | 4 African American | 15 Anoxia      | 21 +      | 36 None     | 8 Y          |         |         |
| AVG Age F    | 46.2 | 21 F   | 28.1 | 3 Asian            | 13 CVA         | 19 -      | 1 Insipidus | 32 N         |         |         |
| AVG Age M    | 46.3 | 19 M   | 27.9 | 1 Hispanic         | 11 Head trauma |           | 2 Type 2    |              |         |         |
|              |      |        |      | 32 Caucasian       | 1 Trauma       |           | 1 Unknown   |              |         |         |

**Figure S5.** Donor demographics for the pooled primary human hepatocytes.
