# Supplementary material for: Probing Liver Injuries Induced by Thioacetamide in Human In Vitro Pooled Hepatocyte Experiments
Source: Int J Mol Sci. 2024 Mar 13;25(6):3265. doi: 10.3390/ijms25063265 (PMC10970511; doi:10.3390/ijms25063265)
Supplement: Supplementary file 1 [file ijms-25-03265-s001.zip › SM_TA_FInal.xlsx]

## Sheet: Table S1
All genes fold-change values across five lot and merged
EID	A	B	C	D	E	Merge
1	0.265905	0.367922	0.412374	0.294682	0.544354	0.296418
2	-0.347382	0.195564	0.181538	0.926778	-0.44121	-0.652218
3	-0.408207	-0.262895	0.158438	-0.649483	-0.325623	-0.296695
9	0.153403	1.64033	1.57988	1.94519	-0.955956	0.763309
10	0.221556	0.373419	0.215411	0.0562356	0.16142	0.2065
12	-0.450403	-0.74792	-0.741212	-0.682835	-0.699457	-0.702731
13	0.190321	0.165687	0.171844	0.171962	0.252046	0.187071
14	0.970047	-0.289052	-0.851816	-5.07705	-0.474154	-0.540131
16	0.352955	0.311186	0.225781	0.277948	0.196079	0.273683
18	-0.115835	-1.78568	1.3298	2.07428	-0.104918	0.559866
19	-0.586167	-0.418369	-0.182706	-0.590337	-0.643967	-0.483418
20	0.197355	2.82674	0.298948	-3.74315	-3.1698	-1.08981
21	0.566996	0.60016	0.437515	0.537334	0.389838	0.507258
22	2.25129	0.404172	5.38799	0.818569	-1.90439	-1.44366
23	-0.0835049	-0.821717	-1.96995	-1.29463	-2.41352	-0.510865
24	1.61329	0.270062	0.813933	0.151527	0.439256	0.18341
25	-0.248071	-0.0682976	-0.418892	0.199844	-0.29316	-0.141701
27	-0.138566	-2.90393	-0.49461	-0.844449	1.91126	-0.967861
29	-2.41974	1.58547	1.18783	0.737253	0.922721	-0.677305
30	-1.49622	0.104988	0.12622	1.31145	-0.269905	1.01411
31	-0.658344	-3.16967	-0.631642	-0.329881	-3.32592	-0.343249
32	-0.742432	0.446972	0.689509	0.224075	0.349066	0.246527
33	0.198993	0.213447	0.208282	0.273049	0.325611	0.244771
34	2.65948	2.24605	3.50268	5.12355	2.63134	1.4855
35	-0.22924	0.793347	0.0622201	0.062846	-0.0373932	0.02995
36	-0.199214	0.330833	0.165825	0.492835	0.297841	0.247923
37	-0.509146	0.119245	0.191619	0.17335	2.42337	0.1188
38	0.0685429	0.303873	0.208438	0.0882558	0.111423	0.11347
39	0.837758	1.44534	0.946906	1.39218	0.747761	1.07488
41	-1.38242	1.37316	0.44476	1.00805	0.992312	0.764695
43	3.64952	0.50194	0.786374	0.385125	0.742435	2.12295
47	0.400207	0.595291	0.251467	0.73355	0.341549	0.346779
48	-0.182607	-0.0628041	-0.227692	-0.479161	-0.275308	-0.201902
50	-2.77931	-3.39634	2.83911	-3.32401	2.27401	-1.94117
51	0.319691	0.182852	-5.45201	0.471582	0.351426	0.161275
52	-0.215239	-0.217669	-2.44034	-0.167376	-0.27466	-0.170652
53	1.85554	-3.163	-1.81623	1.21038	0.745566	-0.590722
54	0.982564	1.66333	0.983152	0.100938	1.76344	0.759888
58	-0.976591	-1.11863	-0.348231	-0.559458	-1.20666	-0.839069
59	0.360792	0.471224	0.276433	0.112876	0.0207277	0.24636
60	-0.163306	-0.311335	-0.485459	-0.49044	-4.00753	-1.74407
71	-0.526391	0.882236	-0.415212	0.410543	-2.26191	-0.231217
72	-0.407319	-0.046775	0.39933	0.0965881	0.475496	0.104674
81	-0.230592	-0.232382	-7.31609	-0.27194	-0.195377	-0.323964
86	-2.36911	-0.139574	-0.256375	4.92385	-0.112448	-0.139819
87	-0.331624	-0.458952	-0.548827	-1.28085	-0.379046	-0.718232
90	-0.284169	0.309022	2.95804	5.24699	3.1491	1.09217
91	-1.17856	-3.26516	0.127077	0.217871	-0.185769	-0.882924
92	0.223408	0.890383	0.973358	0.249631	0.135245	0.124296
93	-0.215316	0.0973573	0.252798	0.264395	-2.13743	0.206009
94	-0.582658	1.81531	0.904242	0.733593	-1.13752	0.611083
95	2.95558	0.204111	0.188484	-2.50564	-1.81878	0.113061
97	0.146298	0.536479	0.607929	0.567439	-0.815043	0.441775
98	0.430441	0.373269	0.497121	0.263971	0.429587	0.399771
100	-0.0817608	0.0910564	0.307597	0.605035	0.400173	0.138901
101	-1.19164	0.122284	0.480913	0	0.615387	0.164848
102	-0.192023	-0.245126	-0.293321	-0.230665	-4.20462	-0.189921
103	-3.91413	-0.611791	-6.0882	0.323491	-0.494415	-1.7952
104	2.4755	-2.62468	-1.48485	1.63766	1.50463	-0.429438
105	0.108013	0.244251	1.48742	0	-0.0151151	0.381178
107	0.266071	0.643447	0.257094	0.95719	-0.0340063	0.418785
108	-0.318801	-0.699846	0.723741	-0.513928	0	-0.245541
109	1.57494	1.4605	1.08096	-1.4364	-2.17897	-0.459595
112	-0.0937945	-2.31388	-0.112651	0.00919123	0.0505549	-0.031444
113	-1.29848	-1.16027	2.58834	-0.970736	0	0.447083
115	-0.0828058	0.119249	-0.432375	0.109073	-1.46783	0.0484911
118	-0.387493	-0.209628	2.3474	-0.575593	-0.151386	-0.396745
120	-0.469265	-0.716574	-0.718536	-0.76091	0.680982	0.788511
123	0.348413	0.319441	0.296256	0.356171	0.421153	0.34918
124	-0.210573	-0.15563	-2.46837	-0.0152691	-0.288895	-0.163359
125	0.283395	0.609928	-0.403038	0.225363	-1.08536	0.18713
126	-0.756834	-0.44053	-0.467492	-0.202644	-0.859644	-0.544544
127	-0.305972	-0.291974	-0.362257	-2.32716	-0.336344	-1.5206
128	0.353077	0.441556	2.72165	0.384064	0.268242	0.253252
130	3.05915	0.134545	0.2823	0.203792	-0.0643248	0.82916
132	-0.413176	-0.161842	-0.192889	-0.165545	-0.193619	-0.293426
133	-2.36002	-0.267253	2.02408	0.169643	0.842569	0.98566
135	0.441427	-2.84514	1.34426	0.355723	0.917722	0.108127
136	0.112736	-0.41514	0.474409	-1.69757	-0.581432	-0.409048
140	-0.155861	-0.622906	0.490475	0.262903	0.0679163	0.00900589
141	0.212546	0.219646	0.176589	2.65908	0.25321	0.208157
142	-0.206081	-0.268699	-0.310954	-0.270376	-0.300825	-0.270494
143	0.112536	0.0723369	0.0866867	0.0920779	0.102945	0.0942095
147	0.657941	0.795908	0.813413	0.90541	0.843234	0.804078
148	0.0849627	0.238607	0.303817	0.249572	2.72033	0.154552
152	1.23929	1.33055	1.50427	0.880297	2.02811	1.40284
153	0.26553	0.992862	0.746617	0.93141	0.986538	0.786284
154	0.00644462	-0.057167	0.169127	-0.161777	-0.200374	-0.0478752
156	1.01857	0.908552	1.67947	-1.2269	-0.038945	-0.32825
157	-0.583827	-0.630469	-0.172807	-0.482739	-0.782974	-0.529734
158	-0.78684	-3.13138	-0.612833	-0.322777	-0.404117	-0.294042
159	0.0209178	0.00220006	-0.00272916	0.124316	0.00600032	0.0310339
160	-0.230862	-0.112016	-0.100213	-0.15713	-0.222988	-0.163749
161	-0.294828	0.364625	-0.782909	-0.230272	-0.94808	-0.203445
162	-0.227816	-0.13063	-0.13874	-0.387359	-0.129101	-0.197936
163	-1.17111	-3.70575	-0.824544	-1.85303	-0.115458	-1.56196
164	-0.0806394	-0.0713535	-0.772876	1.51391	-0.0935259	1.15516
165	-0.607173	-0.51452	0.107019	-0.217271	-0.769248	-0.399419
166	0.225587	0.337318	0.385052	0.218782	0.0867486	0.187345
172	-2.57626	1.28427	-1.72603	2.72882	-1.0792	-0.85617
173	-0.211363	-0.0888296	0.0407796	-0.11034	-0.0568712	-0.0844307
174	0.337793	0.167729	0.333433	2.32115	0.370758	0.240577
175	0.226336	0.217855	0.32253	0.113208	0.121632	0.201203
178	-0.0839979	2.7013	-1.07998	-0.0510108	2.13462	0.575799
182	-0.289052	-0.372076	-0.333003	-0.263069	-0.222979	-0.295143
183	0.574489	0.211002	0.292075	0.171831	-4.76293	0.53109
185	1.78126	0.501442	0.644315	0.560904	-2.39728	0.315481
187	-0.401796	0.0784811	-0.255141	-0.245728	-0.294499	-0.222863
189	-0.296754	1.95551	1.83562	-0.122553	-0.191084	-0.125826
191	0.10285	0.0602937	-0.0854661	-0.0868023	-0.90899	-0.396516
196	0.0929928	1.23955	0.266211	2.11759	0.11225	0.106408
197	0.186717	0.342487	0.255566	0.276784	0.28298	0.2698
199	-0.429213	-0.557526	0.408865	0.110033	0.855391	0.079119
202	-0.107879	-0.129855	-0.488023	-0.238862	-0.117841	-0.274653
203	0.263826	0.352097	0.372165	0.249653	0.308474	0.310135
204	-0.434756	-0.56877	-0.334619	-0.52647	-0.605559	-0.526779
205	-0.272613	-0.436278	-0.250136	-0.370522	-0.242064	-0.31343
207	-3.90314	-2.26955	7.76472	-0.152207	-0.134409	-0.158356
208	0.697348	-1.49092	-0.573118	-0.280533	-0.151135	-0.28019
210	0.811111	0.126615	0.224872	1.03397	-0.00357367	0.418628
211	-0.884912	-0.464609	-0.595399	-0.718	-0.657829	-0.570483
213	0.524257	0.241996	0.599742	0.314217	1.00939	0.219105
214	-0.26795	-0.31217	-0.316349	-0.834798	-0.0720591	-0.404202
215	-0.22167	-0.266934	-1.63183	-0.375785	-0.226797	-0.218401
216	-0.563697	-0.440342	-0.460036	-0.550122	-0.55918	-0.513782
217	0.923217	0.457146	0.412158	0.317095	0.187815	0.229464
218	-1.15156	3.13042	0.650234	1.6844	0.857042	0.858177
219	-0.133366	-0.33513	-0.412285	-0.457967	-0.130373	-0.292931
220	-1.37622	1.00452	-1.26866	1.57171	-2.72183	-0.56545
221	0.199524	0.350423	0.479505	0.439559	0.214994	0.337689
223	-0.0611517	-0.0910305	-0.0391259	-0.175998	-0.117351	-0.0960384
224	0.403866	0.285739	5.59458	0.333211	0.335099	0.269204
226	-0.232068	-0.240747	4.79881	-0.239149	-0.25271	-0.228766
229	0.299758	0.188786	0.25527	-0.699057	-0.639354	-0.664544
230	0.224662	0.483911	0.614751	0.277441	-0.267353	0.360679
231	-0.627519	-0.87615	-0.0290854	-0.661383	-0.538871	-0.545711
239	-0.134765	-4.85e-05	-0.165221	0.614041	-1.36263	0.0409211
240	-1.13834	1.05064	-1.31556	0.640681	-1.16281	-0.385371
241	-0.235306	-0.288304	0.147118	-0.278473	-0.182164	-0.166593
245	-0.234789	-0.136123	0.259552	0.790262	0.288638	0.194721
249	0.247566	0.461582	0.492376	0.507593	-0.107319	0.261847
257	-1.11421	1.07799	2.08564	1.13273	0.238541	0.574516
259	-0.259831	0.26104	0.354914	0.214844	-0.19103	0.206287
262	2.31193	-0.748852	-1.24482	-0.704032	0.729739	-0.554552
267	-0.560101	-3.09056	1.00997	2.43451	-2.25492	-0.521188
271	-0.23728	-0.253402	-0.288183	-0.174704	-3.32328	-0.208602
272	0.518386	2.14309	0.277828	0.356811	0.531489	0.400415
273	0.0322755	-0.371496	-1.75542	-1.54244	0.191554	-0.681584
274	-0.344821	0.240246	0.383052	-3.86254	-0.286557	-0.307299
275	0.668834	0.478778	0.1922	5.04343	0.649536	0.532799
280	-0.507872	0.261302	-0.350274	-0.943244	-0.56629	-0.307382
283	-0.262651	0.38821	0.429672	0.2175	-0.17227	0.226435
284	4.55124	-0.00165416	-1.14247	2.6853	0.105083	1.23139
285	-1.98204	-2.57388	-2.18134	-1.01847	-1.54083	-1.75697
287	0.0558017	0.550595	0.820692	-0.603157	0.327249	0.231
288	-0.639415	-1.80588	1.33368	1.86346	-1.96091	-1.15874
290	-0.0874328	0.250183	0.51858	0.301523	-0.434187	0.189126
291	0.15916	0.069451	0.0771776	0.0455103	0.184871	0.0879114
292	-0.766299	-0.4716	-0.0425178	-0.143562	-0.303211	-0.56685
293	0.222288	0.199277	0.155205	1.52526	0.135575	0.1594
301	-0.521837	-0.404216	-0.640885	-0.439825	-0.364345	-0.473327
302	0.268646	0.510229	-0.694784	1.07359	0.354727	1.28746
306	0.405431	-0.513427	-0.419064	-0.664621	-0.12352	-0.347448
307	-0.24373	-0.200532	-0.484358	-0.323732	-0.310143	-0.230484
308	0.147431	2.28574	-0.327621	-1.11388	0.113774	0.0678165
309	-0.259568	-0.227401	1.01933	-2.67638	-0.310498	-0.312958
310	0.326639	-0.147958	-0.284785	-0.0820287	-0.279861	-0.472526
311	-0.194347	-0.193549	-0.388973	-0.364661	-0.262562	-0.27089
312	-0.159056	0.324409	0.926037	-0.291767	0.115089	0.096067
314	-0.0933346	-0.228476	-3.18733	-1.1681	-0.14312	-1.06459
316	1.42966	0.254611	0.48924	0.696916	0.809198	0.740002
317	-0.228578	2.76668	3.28664	-1.213	3.30899	-0.11334
318	-2.66734	0.523169	2.21511	0.562836	-0.449483	0.672879
319	-0.0708264	0.0588285	0.105453	0.217195	0.00707838	0.0644371
320	0.0648899	0.436814	1.11326	0.447037	0.293024	0.232001
322	0.724766	0.353604	1.16786	2.7414	0.2661	0.700186
323	1.76596	-2.28492	-4.66702	-0.252815	-1.9085	-0.496378
324	2.2125	0.800021	-0.8303	-1.2067	-0.96658	0.220212
325	-0.0703893	-0.0616168	-0.00149801	-0.129244	-0.293737	-0.110404
327	2.79589	-4.6524	-0.858654	-0.456907	-0.499116	-2.11595
328	1.12609	-2.41048	-0.305524	-3.49383	-0.116145	-1.01697
329	0.17717	-0.105575	-5.03516	-0.14323	0.0781788	-1.2996
330	-1.8237	-0.456576	-0.318884	-0.374652	-0.384577	-0.331369
331	1.95081	0.0634779	0.188699	3.60519	-1.10172	0.0624256
332	-0.764107	-0.837748	-0.579056	-0.80136	-1.21361	-0.838317
334	-0.275832	-0.434947	0.393799	0.219799	-1.29345	0.114086
335	0.385514	0.274777	0.528324	0.563889	0.252133	0.327765
336	0.120005	0.231586	0.397578	0.416963	-0.886063	0.204422
337	0.202	0.266022	0.239329	0.321481	-0.000608823	0.206536
338	-0.246462	-0.768212	-1.15998	-0.24475	-0.276836	-0.598703
341	0.216856	0.256932	0.25229	0.404785	0.369285	0.214152
342	0.267029	-0.0698873	-0.148743	-0.306952	-0.357376	-0.12266
344	-0.141346	0.231876	0.294016	-0.346828	-0.38756	0.111456
345	0.389473	0.223398	0.343794	0.213667	0.197453	1.28114
346	1.4536	0.324152	0.214452	0.204836	0.621983	0.564686
348	0.216339	0.237665	0.416891	0.22553	0.16602	0.253382
350	0.350829	0.305004	0.273624	0.253546	0.288494	0.295192
351	-2.77318	0.753854	0.326407	0.105613	4.15961	0.113215
353	-0.606019	0.153389	0.11444	0.344978	-0.14839	0.0847286
355	-3.15664	-0.394134	-0.835176	-0.669252	-2.02538	-0.492756
357	0.095898	-0.447389	-0.575283	0.697535	-1.32048	-0.220214
358	0.136685	-1.64487	0.280524	0.311542	-0.541197	-0.291094
360	0.0370164	-0.92755	0.247742	-0.739351	-1.76648	-0.740781
361	0.308327	0.143567	0.24571	0.163827	0.215487	0.216265
364	3.04703	1.38588	1.58727	0.705699	1.01486	0.358182
366	0.347711	0.605188	0.169879	0.703847	0.215471	0.518408
367	-2.67176	-2.26995	-2.49143	0.821247	-3.01088	-0.990934
368	0.116	0.22179	0.396106	0.257441	-2.34861	0.184808
369	-0.0866768	-0.0576486	0.0592	1.23063	-0.0821998	0.22023
372	-0.143424	-0.136615	7.06671	-0.673313	-0.103994	-0.136986
373	0.0718349	-0.0601154	-0.0347659	-0.313034	0.0556077	-0.232657
374	-1.03003	-1.07959	-0.155198	-0.780112	-0.418651	-0.691768
375	0.698057	0.682742	-5.20538	1.3505	-4.13018	-1.26147
377	0.321063	0.170349	-0.216242	-1.58857	-0.0964966	-1.49278
378	0.767537	-0.181933	-0.445915	-0.171196	-0.22504	-0.15052
379	0.231658	0.588435	0.505078	-0.0692734	0.127485	0.277565
381	-0.0861873	-0.246947	-1.52769	-0.452805	-0.0285738	-0.587947
382	0.137188	0.0888657	0.125108	0.113247	0.203014	0.134378
383	-0.313817	-1.77734	-0.72932	-1.5963	-0.509227	-0.162329
384	0.10275	-0.0194607	0.133313	0.155816	0.0891746	0.0932098
387	-0.346923	-0.350198	-0.591357	-0.7595	-0.400173	-0.488736
388	0.401188	0.361161	0.28565	0.486532	0.343907	0.376581
389	0.426419	0.266272	-0.584148	-0.39022	0.309947	-1.043
390	-0.14433	-0.509194	-0.303877	-0.186798	-0.13352	-0.254651
391	3.22298	-0.0365721	0.117461	1.99678	-1.3761	1.02048
392	-0.295574	-2.15632	0.123612	2.3675	-0.240145	-0.122304
393	-0.360553	3.22348	0.851878	-0.124989	-0.060143	0.00766053
394	-0.105558	-0.316401	-0.460618	-0.377442	-0.24041	-0.204124
395	-0.552275	-1.65764	0.439998	-0.50959	-1.40135	-0.74153
396	1.66279	-3.91206	-0.226761	-0.501999	2.13501	-0.246021
397	-0.370088	-0.233441	-0.696865	-0.300703	-0.270227	-0.250225
399	-0.957356	0.639579	0.452087	-0.635177	-2.03396	-0.242805
400	-0.147798	-0.0816128	-0.38067	-0.230467	-0.118925	-0.0999585
402	0.0822113	0.262753	0.0932663	0.528271	-1.89284	0.0494664
403	-0.00869698	-0.116016	-0.0218218	-0.021376	-0.0546848	-0.0436286
405	-2.28173	0.120578	-0.413562	2.84481	0.334988	-0.824036
406	3.02863	0.562248	-5.41013	0.439725	2.14821	0.268278
408	0.432264	0.358903	0.510817	0.604181	0.594664	0.501061
409	0.421691	0.192707	0.260492	0.360641	0.346306	0.584448
410	-0.523815	0.1991	0.341187	0.49768	0.428266	0.225669
411	-0.313796	-0.445764	0.243475	0.375598	0.254857	0.0760776
412	-0.479586	-0.728544	-0.646865	-0.783178	-0.835434	-0.632401
414	-0.210392	-0.175761	0.448713	-0.123876	-0.269739	-0.138662
415	0.531565	0.622443	0.622229	0.60147	0.418372	0.560106
416	0.0558509	0.593787	-0.711819	2.09869	-0.532642	-0.665604
420	0.321874	0.253633	0.1192	0.0788178	0.29653	0.214905
421	0.319527	0.559756	0.513055	0.62381	0.387084	0.481537
427	-4.36914	-4.33867	4.08226	-2.86519	3.08549	1.35058
429	-0.233976	-0.237898	0.495998	0.622291	0.0245929	0.134789
432	0.508153	0.392339	0.39953	0.202335	-0.414704	0.987948
433	-0.10215	0.294274	0.419971	0.537698	-0.157356	0.138464
434	-0.0862784	0.47691	0.37578	0.333236	0.331305	0.287072
435	-0.252313	-0.314474	-0.444197	-0.295343	-0.434529	-0.378356
439	0.0684976	0.0970992	-0.116252	-2.08798	-0.442348	0.289713
440	1.10076	0.59046	0.933783	0.540069	0.556193	0.599899
443	0.192106	0.0743615	-0.0657818	0.44102	0.88515	0.338152
444	-0.435689	-0.292466	-0.611229	-0.521027	-0.481273	-0.386872
445	0.187501	0.233799	0.207622	0.19764	1.00943	0.188288
462	0.294076	0.279049	0.274621	0.280168	0.242038	0.274883
463	-0.418829	-0.523708	0.477132	-0.253752	-0.238206	-0.099112
466	0.187403	0.119993	0.823835	0.336185	0.466147	0.0809636
467	0.648558	0.438489	0.303305	0.431403	0.629635	0.491173
468	0.502484	0.472277	0.328849	0.447078	0.440958	0.439222
471	-0.0674772	-0.544751	1.0712	-0.167676	-0.0974768	-0.128796
472	-4.24471	-3.39272	2.35574	-2.27451	-3.03321	-0.955716
473	-1.86246	-3.22189	4.80868	-3.81283	1.77852	-1.00344
475	0.162247	-0.793134	0.274583	0.122284	0.0258849	0.126479
476	3.94473	-1.58985	1.25755	2.44237	-2.12843	-0.582232
481	-2.53281	-0.467724	-0.190876	4.58567	-0.183797	-1.74639
482	-0.0670087	0.552315	0.944286	0.710884	0.308286	0.487881
483	0.181506	1.13587	3.41205	0.111376	1.02708	0.112598
486	-0.187023	-0.311534	0.697848	0.110237	-0.199837	0.0226428
487	0	-0.0351312	1.30154	0.772903	1.52554	0.953366
488	-0.443304	-0.306176	-0.224859	-0.596174	-0.582049	-0.42962
489	-0.598823	-1.56218	0.30904	-0.70818	-2.00939	-0.924809
490	-0.108647	-0.225893	1.77129	1.60298	-0.286633	-0.141902
491	-4.53467	-4.68035	1.61427	1.87138	-1.92891	-1.98349
493	-0.209346	0.15566	1.32661	-1.27703	-0.310965	-0.0815407
498	3.11396	0.425467	-0.356078	-0.605466	-0.493832	-0.226792
501	1.36552	-3.57316	-2.99001	-1.74491	3.01679	0.113799
506	0.652527	0.541375	-0.640138	-1.9783	-1.21734	-0.647188
509	0.292746	-0.0593116	-3.7955	-0.0957384	0.313841	0.24206
513	1.05696	2.1113	0.285117	-0.0942505	-0.119729	0.53401
514	0.22405	0.20351	0.219362	0.0774858	0.176893	0.143067
515	-0.0792201	-0.174924	-0.335769	-0.257311	-0.114706	-0.107416
516	2.94069	-2.27158	0.854538	-1.65222	0.350133	-0.771689
517	0.140317	0.26468	0.286271	0.22181	0.114168	0.206342
518	-0.2158	0.325918	-0.331117	-0.513128	-0.221582	-0.301569
521	0.297446	0.189787	0.230677	0.10029	0.150065	0.194546
522	0.220155	-0.408404	0.142328	-0.305421	-0.263939	-0.249342
523	-0.132428	-0.122795	-0.202703	-0.24179	-0.155929	-0.170236
526	0.0349609	0.520909	1.06241	-0.0337665	2.32363	0.346952
527	-0.328188	0.0389212	0.260052	0.117194	0.0508363	0.0960306
528	0.257671	0.213225	-0.195114	0.179157	0.241231	0.160389
529	0.524109	-0.894383	-0.354811	-0.785767	0.0258539	-0.664475
533	0.0915627	0.118951	1.1829	-0.288107	-1.74645	0.950427
535	0.30023	0.166355	0.328965	0.400791	0.235147	0.28719
537	0.115521	4.36106	0.195412	0.201059	0.103422	0.147631
538	-3.53947	-1.66276	-2.05735	1.93923	-0.966497	0.883027
539	0.136321	0.0719335	0.135384	-0.371872	0.098986	0.093818
540	-2.88466	-0.286343	-0.480777	2.4144	-2.86773	-0.173679
545	-0.42294	-0.283108	-0.427498	-0.241471	-0.666976	-0.407509
546	6.15057	-1.87209	-4.14553	3.8524	-4.78101	-2.38476
549	0.103523	1.50376	0.178787	0.286254	0.622275	0.137702
550	0.0973928	-0.328681	0.81651	-0.178742	0.217613	0.407495
552	0.103225	-0.0664373	-0.0486544	-0.0585787	-0.351178	-0.0834783
558	2.51195	-1.58945	-0.139214	-1.28327	0.0838016	-0.508419
563	0.253352	0.211658	0.330491	0.210131	0.16496	0.235011
567	0.120515	1.51927	0.320313	0.186737	0.42723	0.126501
570	0.354867	0.358241	0.868254	0.828074	1.02672	0.825418
571	0.519842	0.304272	0.227295	0.515747	0.509374	0.4162
572	0.217416	0.32467	0.572725	0.291223	0.269079	0.248161
573	0.0958732	0.166414	1.83005	-0.538124	-0.232632	-0.195489
578	0.142139	0.881625	-0.206294	0.0338047	0.864592	-0.00178624
580	-0.12353	-0.520765	-0.462194	-0.377691	-0.334982	-0.362965
581	0.27331	0.313898	0.271467	0.158292	0.283542	0.260995
582	0.0188384	0.253433	0.457936	0.412622	-0.36133	0.157156
583	2.03161	3.95142	4.65321	-1.20634	0.964675	-0.0988374
585	-2.25462	-0.0530199	-0.0534805	-3.79572	1.95953	-0.465215
586	-0.0527179	-0.649018	0.222398	0.0949698	0.108327	0.0855949
587	-0.12833	-2.11906	1.70159	2.3403	-0.605518	0.327499
590	0.341486	0.493578	0.917913	0.159229	0.623303	0.541107
593	-0.336416	-2.01803	-1.07111	-2.06154	-0.0931399	-0.72504
594	-0.332556	-0.146621	-0.346268	-0.238987	-0.26647	-0.236363
595	-0.262155	-0.466812	-0.453588	-0.667949	-0.278766	-0.424961
596	1.74594	-1.08925	0.959469	0.913967	0.519816	0.482331
597	-1.6585	-1.91339	-1.59511	-1.91766	-2.06549	-1.82913
598	0.165081	0.79682	-0.28094	0.170005	0.281916	0.12642
599	1.86268	-0.683638	-0.321779	0.292917	1.42082	0.733088
602	-0.422829	-0.22217	3.30292	-2.4267	-0.255678	-0.194641
604	0.128193	0.110127	1.03011	0.758552	-3.52503	0.479348
605	0.568008	0.302076	0.443719	0.598807	0.569828	0.49738
607	-0.4398	2.05003	1.68528	-1.37618	-1.40769	0.777391
610	-0.281211	-0.595669	-0.0462766	-0.466333	0.074456	-0.261903
613	-0.30467	-0.117316	-0.2105	-0.0475952	-0.205514	-0.10272
617	-2.35453	-2.7851	-0.70046	0.277704	-2.00099	-0.266004
622	-0.832872	-0.73885	-3.14599	-0.769535	-0.597388	-0.353719
623	-0.228589	-0.240306	-0.378691	-0.639123	-0.137518	-0.323911
624	-0.747161	-1.47738	-1.09556	-0.360805	0.611649	-0.870179
627	2.21154	-0.445067	0	0.709277	0.394593	0.552991
629	-3.5183	-0.122579	0.577375	-2.26026	-1.88925	-0.718145
631	0.727728	0.994847	0.516729	1.5201	0.956571	0.670689
633	-0.768953	-0.399937	0.181365	-0.205225	-0.793995	-0.396472
634	-0.131734	-2.35093	-3.94619	2.16176	-2.48714	-1.10941
635	-0.521711	-0.929379	-0.627321	-0.336875	-0.890507	-0.660269
636	-0.744096	-0.848777	-0.632015	-1.96997	-2.2684	-1.08021
637	0.276342	-0.713054	-0.578151	-0.076503	0.398809	-0.264313
638	0.218952	-0.324281	-0.410908	0.326267	0.179235	-0.0012034
639	-2.15397	-0.535485	-2.64964	-0.173354	2.01787	-0.287703
641	-0.565912	-1.27216	-2.41466	-1.89623	-4.12623	-1.97668
642	-0.233051	-0.324815	-0.302315	-0.369904	-0.366177	-0.318361
644	0.232112	0.313925	0.40284	0.187799	0.281648	0.284555
645	0.253986	0.233646	0.234133	0.177719	0.228581	0.226506
648	0.137546	1.5633	-1.10146	0.06426	0.132103	0.0682577
649	-2.24441	1.97464	2.29706	-0.534911	-0.212008	-0.785839
650	0.326495	0.370886	0.265858	0.304729	0.470147	0.348516
652	0.577823	0.251146	0.727342	1.61042	0.828652	0.492364
654	0.0681398	0.184461	0.47486	0.376667	0.632815	0.348443
656	0.483113	0.54538	0.379608	0.505666	0.588002	0.501253
657	-1.83453	0.397446	0.256804	-0.234398	2.0954	-0.958596
659	-0.0453172	-0.0249357	-2.04007	0.585464	0.0568833	-0.16262
661	0.503807	0.43295	-2.54132	0.442886	-0.438857	0.349394
662	0.0473732	-0.260766	0.692141	0.793045	-0.38199	0.215449
663	-0.144588	0.13011	2.2523	0.381525	0.191741	0.152688
664	-0.038389	-0.262634	-0.380804	-0.269928	-0.0357657	-0.183927
665	-2.2696	-0.22479	-5.45706	-0.202122	-4.31919	-1.97358
666	-0.755641	-0.0609829	-0.032564	-0.104847	0.00994016	-0.0453104
667	-0.762661	-0.775223	1.23354	2.17849	-0.997258	-0.675907
669	-0.686154	-0.303747	-1.82425	-0.718186	-2.96269	-0.484506
670	0.304465	0.321912	0.438604	0.269601	0.258779	0.31956
672	-1.13188	1.5486	4.14192	-3.84453	-1.07075	-1.19328
673	2.77124	-3.90895	-2.53337	2.88046	2.28462	0.76242
675	-2.22466	1.35034	-2.42054	-1.14969	-2.55225	0.530464
677	-0.160772	-0.174268	0.524837	-0.47236	-0.163187	-0.0962871
678	-0.0788464	0.126052	0.266033	0.137932	-0.0675129	0.0776238
682	0.118642	0.183536	0.178691	0.272556	0.111055	0.175339
683	2.28146	-0.75045	1.80166	1.29283	-2.02042	1.08704
684	0.164981	-0.0493471	0.433752	-0.0848727	-1.00775	-0.26096
685	0.239787	-1.41067	0.257827	0.795364	0.152123	0.141533
686	0.34226	0.507218	0.518734	3.33552	1.69037	0.337958
687	0.166264	0.0738152	0.250705	0.333289	0.0510924	0.175926
688	-1.72651	-0.609599	-0.740739	-0.558024	-0.386404	-0.430264
689	0.0590625	-3.78635	-0.173081	-0.361625	-1.71364	-2.00584
694	0.281871	0.289653	0.458735	0.355392	0.341669	0.372964
699	-2.20224	-0.644297	-0.877802	-1.13373	-1.00125	-0.907531
701	-0.731356	-0.754764	-0.581882	1.41961	-1.29694	-0.874933
705	4.59805	-0.20736	-0.266897	-0.227677	-0.214037	-0.208681
706	0.0984357	0.257216	0.570278	-2.39957	0.111947	0.145608
708	-0.0627408	-0.203764	-0.273918	-0.261602	-0.173851	-0.194282
710	0.249191	-2.80441	0.417075	0.541082	-3.08689	0.232892
712	0.402852	0.498201	-1.37468	0.676764	0.160928	0.391828
713	0.245465	0.185338	0.165318	0.406931	0.19372	0.240247
714	0.278867	0.251501	0.259078	0.548686	0.268647	0.322251
715	-0.12167	-2.72142	0.262218	0.240963	-0.135726	-0.78398
716	0.815574	0.645123	0.327243	0.467099	-0.895373	0.615604
717	3.81434	0.222076	0.458198	0.395332	0.475854	0.364517
718	-0.808601	-0.616183	1.53856	2.04061	-0.779395	-0.520786
719	0.573759	-0.417431	-0.247734	0.153142	0.153786	0.0439829
720	-0.423013	-1.44141	0.878662	-3.02627	-0.319575	-2.01138
721	-0.376323	-0.200696	0.878662	4.45616	-0.319575	-1.16822
722	-0.338677	-0.0290676	-0.31472	-0.145503	-0.293643	-0.181561
725	-0.423698	-0.383953	-0.256787	-0.215015	-0.295511	-0.190194
726	0.214217	2.09357	0.400144	0.150786	-2.04533	0.165678
727	-0.351085	-0.200081	-0.15262	-0.287606	-0.543478	-1.2483
728	0.296281	0.555229	0.188832	0.741208	0.596056	0.476454
729	-0.401546	1.40123	-2.50859	-1.97442	-0.332989	-0.253121
731	-0.250638	0.0517155	0.302138	-0.0608183	-0.223595	-0.0353481
732	0.134872	0.236673	0.249782	0.173526	-0.762965	0.130556
733	0.110822	0.255477	0.291511	0.146807	0.30179	0.145365
734	0.246236	-0.160289	-0.353036	0.363605	0.192337	0.117945
735	-0.261038	-0.452206	0.251445	-0.261295	-0.678357	-0.476034
738	0.198348	1.18391	2.93909	2.57062	1.54017	-0.172454
740	0.293679	0.316413	0.0773954	0.29485	0.237501	0.244861
741	0.17251	0.268994	0.0770655	0.155558	0.232276	0.182175
745	-0.439287	-5.26236	1.18498	-0.358184	-0.343265	-0.284673
746	0.224954	0.121375	0.414022	0.222691	0.122521	0.222004
747	-0.0610484	3.27379	1.28326	0.710211	-0.904801	0.852954
752	-1.92526	1.81468	-1.26517	1.26668	-1.84125	-0.516265
753	-0.777689	-2.91107	2.41905	-4.67542	-2.44194	1.33379
754	0.213685	0.16926	0.411292	0.445274	0.18723	0.32965
755	0.0907107	-0.216128	0.393027	0.292363	-0.200584	0.101385
757	-0.386044	-0.377944	-0.323273	-0.613323	-0.535488	-0.44633
758	0.54139	0.551413	0.562416	0.553687	0.431276	0.528864
759	0.308509	0.216584	-0.0347118	-0.428734	1.15487	0.24751
760	-0.151475	0.389453	-0.183402	-0.13227	-0.105418	-0.132645
761	-0.382896	1.20993	0.12103	-0.340112	0.557069	0.389717
763	0.439122	2.80645	0.936522	1.32694	0.304576	0.660251
770	0	0.793975	1.2384	0	0.383726	0.592022
771	0.288648	0.459621	0.673445	0.695444	0.380554	0.500434
773	0.590287	0.313616	0.553843	0.758298	0.357212	0.375588
776	-2.59742	1.80246	2.11532	1.72454	0.819833	-0.609636
780	-3.89174	-3.8236	2.94881	-2.5489	-1.78179	-1.17996
781	-0.0755879	0	0.0321944	1.72322	0	-0.0366169
782	1.18837	2.37332	0.460147	0.67445	1.5818	1.26071
783	1.18032	0.534149	0.233297	-0.210816	-1.40638	0.14078
784	1.72476	1.5482	2.03517	1.45647	-1.81407	1.43104
788	-0.18323	-0.149618	-0.206724	-0.170941	-0.119544	-0.165118
790	-0.129227	0.142277	0.666456	0.103774	-0.0818612	0.208775
793	-0.492953	0	-0.945926	0.0953377	0	-0.376373
796	0.240191	0.305675	0.295325	0.304594	0.167029	0.263453
797	1.05249	0.943471	0.192937	0.697054	0	0.722833
800	-0.248873	-0.556267	1.76567	-0.48205	-0.400535	0.774299
801	-0.170928	-0.218484	0.197016	-0.773971	-0.124873	-0.151904
805	-0.752062	-0.313522	-0.293579	-0.345555	-0.270905	-0.277094
808	-0.321212	-0.324815	0.539857	-0.211072	-0.283929	-0.242605
811	-0.0669719	0.738104	0.195372	0.304899	-1.89097	0.222524
813	-0.214782	-0.20846	-0.214317	-0.222303	-0.226083	-0.216297
814	1.09031	0.316605	-0.542333	2.41479	-0.374532	0.352252
816	1.53786	0.15783	0.0577366	-1.69426	2.51698	0.419713
817	1.13985	0.307071	-0.951472	0.404728	0.612462	0.517518
818	0.326759	0.263448	0.520429	2.42433	0.273034	0.207691
819	0.668636	0.358202	0.400341	0.346542	0.225928	0.400819
821	2.98976	0.488101	5.8413	0.493396	-5.25547	-2.73974
822	0.68523	0.343707	0.408511	0.699169	0.497972	0.418007
823	-0.101847	3.93498	-0.116364	-0.0610206	-0.165528	1.07551
824	-0.651453	-1.78397	-0.133329	-1.36128	2.68752	0.217539
826	0.076411	1.87503	0.471863	0.165041	2.2638	0.209879
827	-0.554559	-0.108499	1.35218	0.383713	-0.657367	0.0815245
828	-0.249017	-0.3058	0.717845	0.773539	0.574143	0.302964
829	2.76801	-0.206698	-0.264272	-0.171202	-0.085701	-0.159544
830	0.122327	-0.183385	-0.592296	-0.225333	0.0269625	-0.147986
831	-0.191156	-0.685644	-0.686375	3.77088	-0.407905	-0.465967
832	-2.74903	-0.131913	2.3764	-0.993447	3.20348	-0.0932632
833	1.46616	4.5387	0.851245	0.413849	0.253978	0.216809
834	0.18799	-0.0786048	-0.13586	-0.237099	-0.0419076	-0.530284
835	-1.42054	0.17478	0.354602	0.768303	1.23604	0.104528
836	-3.1252	-3.31351	-2.24264	1.53022	0.22232	0.123262
837	0.588006	-0.142156	-0.67098	-1.76508	-0.616295	-0.416148
839	0.208376	0.315383	0.25705	0.201933	0.311651	0.259772
840	0.121463	-0.293694	-0.155473	-2.44209	0.184658	1.06954
841	-0.748953	-1.12891	-0.813026	-0.73843	-0.513293	-0.787623
842	-4.17261	1.32013	-0.837949	0.130283	-2.37181	-1.60552
843	-0.370104	-1.43196	0.235486	2.74601	0.151849	0.918246
846	-0.107902	0.093686	0.325894	0.236008	1.03931	0.327877
847	0.291029	0.355457	0.274426	0.292897	0.331759	0.310007
857	0.556618	-0.838743	-0.66812	2.32249	0.321593	-1.74254
858	0.125461	-0.225419	-0.200831	-0.340407	0.168355	-0.175381
860	-2.60174	0.675767	-1.31894	-1.10256	0.296389	-1.03616
861	-0.339327	2.62754	-0.390721	0.341923	2.17674	0.931116
863	-0.422554	-0.523517	0.415344	-1.04039	-0.249221	-0.365355
864	-0.405887	0.598652	0.725145	1.79423	1.44866	0.8395
865	-2.41637	-0.429457	-0.252713	-0.29356	-0.168575	-0.203406
866	0.103772	0.332496	0.314106	0.784252	0.0752978	0.325151
867	-0.147447	-1.3974	0.398834	0.296883	2.57265	0.0633365
868	2.68588	-0.805571	1.61963	0.755755	1.00037	0.830474
871	-0.929075	-2.60232	1.32402	-1.19198	0.706936	-0.956517
873	0.189112	0.184283	0.16604	0.120216	0.227119	0.178247
874	0.424313	0.51273	0.28653	0.570637	0.691877	0.498123
875	-3.25435	0.113623	0.123233	-0.189293	-0.874152	-0.41408
883	0.367564	0.758339	0.455531	2.9568	0.421534	0.698393
885	-0.453526	0.139519	0.377527	-0.977244	0.753053	-0.0222092
889	4.84292	-3.32493	-1.89177	-1.93713	2.77013	-0.974429
890	-0.842418	-0.533055	-0.744491	-0.824421	-1.06744	-0.801482
891	-0.453479	-0.533845	-0.487865	-0.605605	-0.670806	-0.550701
892	-1.82783	-0.25263	-0.280367	-0.356016	-0.136102	-0.211617
894	-2.10424	-2.04138	-1.13394	-2.17981	-3.02899	-2.10473
896	-0.238004	-0.390738	-0.503477	-0.616276	-0.532483	-0.455306
898	1.7878	0.642043	0.599913	1.86576	0.918316	0.105839
899	-0.526964	-0.5439	-0.659664	-0.615874	-0.6182	-0.592031
900	0.124634	-2.32562	0.761909	-2.61062	2.22575	-1.47179
901	1.09408	0.941103	1.52363	1.04646	1.15928	1.1538
902	-0.156344	-0.241392	-0.412371	-0.250282	-0.262667	-0.263719
904	0.376055	0.862089	-0.727783	0.0981497	-0.178937	0.371609
905	0.195324	0.185067	-0.40919	-2.76829	-0.321855	0.15807
908	-0.150687	-0.214851	-0.317169	5.94622	-0.171441	-0.211554
912	0.864024	-1.37085	0.138001	-0.266376	0.535717	-0.178674
914	-0.940334	0	0.0638578	-0.76127	0	-0.63665
916	1.46099	1.72397	0.752008	-2.80535	-0.0346072	0.176211
920	0.315571	0.214275	0.352562	0.326706	0.272379	0.297183
922	0.661348	-0.504643	0.801692	-0.461386	-0.488079	0.000848085
923	-0.505244	0.359881	0.605639	0.059749	-0.115028	0.148544
924	-0.350956	0	0.18765	-1.0195	-2.11987	-0.615632
928	0.157399	0.958512	0.262687	0.150104	0.269281	0.172685
929	0.761919	0.218962	0.245827	0.317046	0.756299	0.460905
930	0	0.48319	0	-0.871989	0.287703	0.123901
939	-0.336428	0.0561959	0.193638	-0.0111848	-0.142226	-0.0471963
942	1.292	-0.490082	1.02614	0.716477	0.78308	0.670586
947	-1.57621	-0.0936425	0.299065	-0.716977	-1.82869	-0.727637
948	-3.85709	0.326251	0.475127	1.03067	-0.324964	0.0889967
949	-0.16503	-0.423552	0.588409	2.56357	-0.161486	-0.518953
950	0.516607	0.29051	0.222336	0.912974	-4.81929	0.635958
951	-1.54466	0.517264	0.396204	1.58549	-4.4672	-0.805361
952	-0.512521	-0.456977	-0.436899	2.47133	-0.542373	-0.410742
953	0.140353	0.1023	0.0162	0.238214	0.267327	0.153774
954	-0.369615	0.496853	1.27492	1.37974	-0.492548	0.449936
955	0.667572	0.467705	-0.599483	-0.488035	0.388137	0.405687
957	0.179803	0.189522	0.203411	0.275439	0.0866791	0.298303
958	1.14594	-0.117844	0.246288	-0.339327	0.384908	0.0638156
960	0.562766	0.207095	0.167939	0.530921	-2.21941	0.909987
961	0.220003	-0.281348	-0.646478	-2.47706	0.127049	0.163841
962	-0.212359	0.00712577	0.483572	-0.348587	-0.0866822	-0.0308815
963	-0.260388	-0.387388	0.0123429	-0.257664	-0.117102	-0.201173
965	1.94408	0.263671	0.277619	0.342955	0.275516	0.260086
966	-1.01126	-0.216541	-4.57889	-0.638898	-0.888752	-0.615337
967	-4.76765	0.260938	0.288046	0.220838	-2.03473	0.166766
968	0.251777	0.216675	0.357565	0.410968	0.0660937	0.261509
971	0.414712	0	-0.309869	-0.784169	0.543516	-0.300827
972	0.818543	0.148236	0.538525	0.21849	-0.144392	0.188978
973	-0.95792	-0.0322301	0.127034	-0.56091	-0.224735	-0.328907
975	0.230411	0.531378	0.698073	0.661346	0.0896763	0.44347
976	-0.170397	-0.152197	-0.751214	0.558947	0.33686	-0.204386
977	0.450348	0.217731	0.35891	0.193044	0.284117	0.227265
978	0.274609	-0.0849337	-0.0637286	0.102727	0.132689	0.121665
983	-1.08638	-0.816668	-0.809919	-1.26788	-1.15832	-1.02697
984	-3.33897	-0.23959	0.174204	-0.718147	-0.316808	-0.117202
987	-3.3238	0.0631114	-0.345423	-0.542553	-0.0913606	-0.197535
988	0.0294296	0.00686574	-0.0425867	0.028266	0.0613181	0.0175517
989	-0.667452	-0.269558	-0.729855	-0.32612	0.182367	-0.244959
990	-0.183943	-0.204104	-0.760484	-0.939996	-0.939847	-0.523989
991	-0.938731	-0.64108	-0.77715	-0.809022	-0.741815	-0.780666
993	-3.23269	-0.547724	3.77663	-0.871366	-1.19278	-0.763053
994	0.457195	0.27073	0.54536	0.387908	2.57604	0.255166
995	-0.141935	-1.71973	-1.38739	-0.550321	-0.617991	-0.589378
996	-0.117475	-0.203529	-0.488984	-0.221133	-0.21316	-0.181405
997	0.243296	5.75375	0.173288	0.110314	0.195314	0.170215
998	-0.46106	-0.621737	-0.226861	-0.227262	-0.686698	-0.122317
999	3.16032	0.257877	0.368399	0.262825	0.173872	0.226954
1000	-0.828969	-0.324255	-0.563869	-0.329335	0.150944	-0.155698
1001	-2.1414	-2.19496	-2.10235	-1.68491	-3.27647	-1.43789
1003	-0.590521	-1.3939	1.83842	-1.89345	-4.7382	-1.03407
1004	-0.676347	-0.0801776	-2.51085	0.615034	-2.76342	-1.04086
1006	0.371018	0.435808	-0.137995	0	0.632971	0.265696
1009	-0.797532	0.414535	0.395752	-0.595357	-0.593182	-0.40519
1010	0.429197	0.575425	1.2948	0.711794	-0.358229	0.535934
1012	0.657747	-0.666545	0.679079	0.94796	-0.956839	0.0302765
1013	0.319275	0	1.60749	-0.82464	0	0.0884604
1017	0.3549	-2.13265	-2.69542	-0.86969	3.51586	-0.621454
1019	0.309657	0.32983	0.269336	0.30419	0.248326	0.293161
1020	-0.661506	-0.187534	0.371871	0.0396435	-0.0616413	-0.0348571
1021	-0.84244	-0.769609	-0.430247	-0.31412	0.287331	-0.724132
1022	-1.85159	-0.580387	3.91978	-3.76942	-2.10564	0.615804
1024	0.838485	-0.470031	-0.238434	0.277806	-3.56155	-0.0588436
1025	0.474293	0.456954	0.236112	0.206959	0.102561	0.43256
1026	0.209436	0.146583	-0.897773	-0.94754	0.228974	0.154132
1027	0.200829	0.164862	0.232782	0.198996	0.193167	0.19902
1028	1.38176	0.560775	1.32574	0.420141	-1.33084	0.464665
1029	-1.0609	1.0603	-0.84482	-0.641028	1.11752	-0.500433
1030	0.509486	0.236965	0.11122	-0.178441	0.711811	0.315258
1031	-1.15756	-0.747479	-0.54437	-1.25913	-1.28792	-0.998485
1032	0.255213	-0.855542	-0.18695	-0.744789	-0.735788	-0.453096
1033	-0.171188	0.422854	1.68135	-0.766989	-0.80226	-0.227823
1036	-0.0521239	0.212933	0.124691	3.07014	0.125442	0.10265
1039	-0.230122	-0.173006	-0.168979	0.138205	0.66007	-0.623961
1040	-0.223124	-0.144332	0.113495	0.038184	-0.219614	-0.086216
1043	0.553665	0.893028	-0.0917558	-0.707141	-0.218385	0.0861314
1047	0.464733	0.559872	0.308812	0.247913	0.152389	0.347633
1050	0.434729	1.02918	0.729918	0.717045	0.553921	0.693851
1051	0.125961	0.239647	0.248744	0.180293	0.107078	0.181238
1052	0.11695	0.253533	0.38524	0.311231	0.0118409	0.216651
1054	0.829107	0.619601	0.572127	0.754463	1.12124	0.645994
1056	1.0349	0.446281	1.50382	0	-0.115274	0.636916
1058	-1.19777	-0.699462	-0.490344	-0.791486	-1.07984	-0.850797
1059	0.0579233	-0.0178673	-0.125917	-0.0909287	-0.0374228	-0.0419495
1060	-0.41084	-0.435922	0.300641	-1.33603	-1.25403	-0.213419
1062	-1.02857	-1.34773	-0.250077	-2.1808	-2.1555	-1.35424
1063	-1.08714	-0.517505	-0.275526	-0.767806	-1.03297	-0.735343
1066	0.203177	0.295046	0.469789	0.513579	0.17745	0.25006
1069	0.260575	0.338365	0.331996	0.279858	0.2628	0.295611
1070	3.66374	-0.380568	-1.97619	0.386466	1.86154	1.67172
1072	0.190255	-0.167491	0.25373	-0.288381	0.483444	0.112781
1073	0.598238	0.47538	-0.872984	0.29248	0.194612	0.327344
1075	-0.472931	-0.456504	-0.185889	-2.20368	-0.732827	-0.423249
1101	0.434905	1.17441	0.618956	1.04333	0.964565	0.852318
1102	0.120616	-2.37298	0.427497	2.28043	-1.1578	0.264727
1104	0.422518	0.277652	-4.64551	0.147211	0.389477	0.284024
1105	-3.65688	-0.62083	-1.85922	1.17848	-2.73137	-2.05876
1106	0.683794	-1.46524	0.52596	1.22167	0.770567	0.196138
1107	-1.61859	0.984793	1.2275	1.70499	-4.03705	-1.18195
1108	-0.394388	-0.219388	4.33277	-0.358677	-4.19597	-0.201293
1109	0.319328	0.436761	0.335746	0.347266	0.211082	0.330927
1111	-0.995229	0.929532	2.81119	2.82621	-0.449857	-0.834207
1112	0.567909	0.411983	0.497169	0.597327	0.353786	0.402513
1116	-0.469894	0.173227	-0.471417	0.634552	-0.445461	-0.13913
1117	-0.39079	0.529433	-2.26712	-2.13508	-1.20221	-0.829166
1119	0.307396	-1.60022	0.123881	0.240441	0.259587	0.198199
1120	-3.60024	-1.54567	-0.180949	1.46959	-0.210371	-0.137715
1121	0.283548	0.189949	4.12431	0.0762643	2.24966	1.56616
1122	-0.525557	-0.662552	-0.805909	-0.509397	-0.419265	-0.583642
1123	0.0560977	-0.801512	1.7142	2.1829	1.17581	0.235621
1124	0.251554	0.307861	-3.73224	0.265208	0.245017	0.272093
1130	-0.2923	-0.20254	-0.316176	-0.509566	-0.168751	-0.240459
1131	-0.388146	-0.991516	1.06346	-1.41615	-0.68332	-0.600128
1138	0.623718	1.56683	-0.65518	0.378913	1.32943	0.602653
1140	-0.878313	-0.168037	-0.335552	0.463071	0.535441	0.138454
1145	0.244071	0.675021	0.60395	0.572832	1.43183	0.540448
1147	0.0952874	-0.752143	-0.109413	0.802842	0.0525668	0.183487
1152	0.758755	0.424777	0.607889	0.629922	0.549766	0.595091
1153	-3.47204	-3.93086	3.16729	0.722355	-0.19015	1.40138
1154	-0.496049	-0.386374	1.26603	-0.43992	-0.626035	-0.413409
1155	-1.6391	0.0942862	0.0979817	-2.04795	1.36168	-0.964713
1160	-0.144461	-0.893002	0.63115	0.669125	-1.05686	-0.166363
1161	-3.19452	-1.51169	4.56782	-1.49304	-3.29753	-1.16873
1163	-0.51443	0.916248	-0.183522	2.92225	-0.484503	-0.286501
1164	0.0470957	0.0555774	-0.0893925	0.0477278	-0.0486587	0.00336215
1173	-0.108528	-0.150608	-0.172503	-0.225654	-0.0895553	-0.148476
1174	0.145325	-2.95674	-3.18426	-2.56243	-0.036036	-1.61432
1175	0.0833565	-0.602935	0.139155	-0.40748	-0.317177	-0.353397
1176	-0.0777492	-0.155307	-0.0413182	-0.22686	-0.178018	-0.134958
1181	0.128207	0.71926	0.994692	0.627807	0.0151926	0.497561
1182	-0.317017	-0.53057	-0.387166	-0.347894	-0.219575	-0.287841
1183	0.164939	-0.0544779	-0.0430735	-0.204297	0.130086	-0.000470672
1184	-0.139285	-0.501781	-0.324592	-0.209307	-0.516928	-0.33066
1185	0.234188	0.345256	0.300007	0.47823	0.123545	0.297134
1186	-0.887704	0.0747756	-3.08764	-1.36518	3.07175	-1.49574
1188	0	0	-0.692927	-0.953415	-1.00486	-0.472786
1191	0.368041	0.295445	0.741423	0.356447	0.348046	0.419392
1192	-0.90372	-0.525988	1.05309	0.118147	0.0715659	-0.350178
1193	-0.0533659	0.586358	0.270252	0.597169	-0.458471	0.188915
1195	0.359921	2.64142	2.59184	-4.21246	0.485974	0.396063
1196	2.00087	-0.368461	0.721566	3.62613	1.26001	0.433593
1198	1.64737	0.0935738	0.155478	-1.83265	-2.14107	-0.886821
1200	0.161299	0.24613	0.452175	0.291458	0.195374	0.270179
1201	0.384367	0.305018	0.342952	0.377402	3.77795	0.388016
1203	0.282713	0.370358	0.473555	-0.671502	0.315316	0.220898
1207	-0.198791	-0.251299	-0.296896	-0.22473	-0.185784	-0.161575
1209	-0.0565029	0.930502	3.67124	-1.17768	1.22596	0.247043
1211	0.0932936	0.458148	0.24262	0.837356	2.5847	1.03894
1212	-0.740374	-0.0978229	-0.24566	-0.0838891	-1.61769	-0.751316
1213	0.651552	-0.382815	1.12867	-0.292453	0.779518	-0.0990438
1230	0.0681647	-0.0828326	0.166649	-0.289128	-0.162261	-0.0590327
1234	-0.470169	0.827419	-0.948187	-2.20593	-0.332217	-0.119166
1235	-1.76018	0.641366	0	-0.60297	-1.34789	-0.303163
1236	-1.31989	-0.366671	0.605449	-4.00197	0.128296	-1.17611
1238	0.289123	0.168222	-0.568614	-1.61562	-2.06637	-0.903654
1240	-1.54398	-0.866348	-3.90235	-0.160889	-3.40939	-1.98322
1241	0.618075	0.26202	0.754132	0.962177	-0.509829	0.301424
1244	0.235759	0.372725	0.245544	0.32297	0.3049	0.297273
1258	0.97793	-0.93627	0.662373	-0.328103	1.38388	0.291346
1259	0.539938	-0.253455	0.597234	1.95216	0.400855	0.64701
1263	0.27666	-1.4064	-0.211389	0.189165	0.198991	0.0891904
1264	-0.146585	-0.118972	-2.15122	-0.396803	-0.510552	-0.266015
1265	-0.318986	-0.539652	-0.277125	-0.524429	-0.347428	-0.400631
1266	0.156663	0.0496336	-0.207124	3.88703	0.198388	0.0790902
1267	-0.622995	-0.303488	-0.214891	-0.27296	-0.205196	-0.48544
1270	-0.258355	-0.229266	-0.405654	0.286626	-0.0794146	-0.136305
1271	0.729924	1.50967	0.509504	1.54425	2.83613	1.02786
1277	-0.8573	-0.601137	0.3601	-0.256547	-0.926166	-0.513374
1278	-0.631275	-0.53805	0.835915	-0.0366776	-0.665069	-0.349959
1281	-1.00025	-0.917738	-0.135737	-0.555396	-1.075	-0.6663
1282	-0.61748	-0.340571	1.80114	-3.02807	-0.496643	-0.317007
1284	-0.606286	-0.536258	0.523912	-0.744401	-0.546166	-0.329495
1285	-0.19608	-1.08936	0.212951	-0.634186	0.701885	-0.195783
1286	-0.21512	-0.394542	-0.223973	0.97176	0.0969801	0.0477844
1287	1.8862	1.71296	1.47796	4.25779	-1.10618	1.07781
1289	-0.723781	-0.702226	-1.27383	0.53757	-0.428408	-0.314925
1290	-0.440924	0.946214	0.299905	1.04146	-0.315699	0.506992
1291	-0.256855	0.0201245	3.92432	0.0670874	-0.229731	-0.0389181
1292	-0.532168	-0.413855	0.287508	-0.873621	-0.595559	-0.257076
1293	-0.871705	-0.66948	1.16791	-0.57585	-1.50253	-0.689659
1294	-4.04227	0.49979	0.274687	2.79431	-0.889973	-0.186989
1295	-0.10501	0.876839	-3.32861	1.39951	0.261077	-0.436807
1296	1.08676	1.421	-0.0793789	-0.391352	2.97092	0.254566
1299	1.06929	1.49505	1.2197	0.776367	0.735649	0.752242
1303	-0.615952	-0.612355	-0.722391	-0.335901	-2.679	-0.575829
1306	-1.12678	-4.9486	2.75978	-1.00474	-0.427067	-1.1722
1307	-0.681605	0.384666	0.451447	0.458158	-0.0831248	0.00222168
1312	0.465578	0.491766	0.374199	0.274056	0.286694	0.364555
1314	-0.753194	-3.46824	0.412039	0.906304	-3.25202	-0.691325
1315	-0.160316	-0.144407	-0.188936	-0.162311	-0.147886	-0.159878
1316	0.146963	0.0866458	0.666946	0.246144	0.266971	0.87585
1317	-0.125902	-0.0249583	-0.0718554	-0.0458734	-0.0634189	-0.0385734
1318	0.156751	-0.183185	-0.30224	-0.162968	0.101659	-0.0771031
1326	1.37071	-1.16076	-0.341298	-2.41796	0.406463	0.456969
1327	0.193123	0.363787	0.29327	0.15015	0.168404	0.191541
1329	0.233135	0.179461	0.285018	0.130873	0.170625	0.200715
1337	0.161765	0.220286	0.244331	0.126121	0.182652	0.187924
1339	0.142353	0.653127	0.323326	0.235648	0.436107	0.359161
1340	0.141368	0.128378	0.207586	0.166154	0.113567	0.152304
1345	1.28545	-1.07574	0.49308	-1.01047	5.47205	0.195101
1346	0.40346	-0.435239	0.284875	0.453274	0.112635	0.164576
1347	0.238712	1.75298	-0.269281	-0.868119	1.14567	0.106641
1349	0.416179	-0.126572	0.308015	0.229631	0.322262	0.206053
1350	0.157813	0.0890228	0.228458	0.864191	0.0962164	0.128119
1351	0.185828	0.0801669	0.230134	0.095727	0.00601767	0.120467
1352	0.165892	-0.268021	-0.400703	-0.416925	-0.282462	-0.276842
1353	-0.624958	-0.421244	-0.252415	-0.0986985	-0.883708	-0.666075
1355	-0.149465	-0.166975	-0.269029	-0.154389	-0.154064	-0.165329
1356	-0.913676	-0.690977	0.415962	-0.464663	-0.837553	-0.568769
1360	0	0.870484	0	-0.574727	0.139786	0.490744
1361	-0.153699	0.130214	0.22559	0.0891823	-0.132702	-0.102141
1362	-0.329026	-0.138579	-0.955209	-0.126615	-0.267726	-0.192642
1363	0.101944	0.330106	0.606202	0.391358	0.341524	0.355109
1364	0.583481	0.525043	0.345495	0.472595	0.645761	0.515369
1365	0.375444	0.577692	0.65306	0.667518	0.513987	0.55843
1366	1.20595	1.03986	1.23382	1.14969	1.29657	1.18609
1368	-0.123147	0.103402	0.180318	0.139929	2.98654	1.26214
1369	0.322272	0.494342	0.334474	0.270573	0.124014	0.310017
1370	0.13558	0.333259	0.349019	0.396046	0.132747	0.270223
1371	-0.271969	0.321904	0.0495793	-0.132167	-0.446896	-0.0217025
1373	-0.553551	-0.284361	5.04026	-0.326086	-0.742172	-2.79822
1374	0.12102	2.38679	-5.69591	0.420457	0.300117	0.305865
1376	1.03082	0.629511	0.0896913	2.30039	0.878818	0.12628
1379	1.06565	1.94247	-0.921474	2.12568	-2.96157	-0.428118
1382	-0.440314	-0.121289	0.61279	0.252438	0.502359	0.167267
1384	-2.88524	3.07904	0.28116	1.08017	3.56849	-0.596482
1385	0.543244	-1.95685	-0.16308	-0.498907	-0.0869923	-0.10025
1386	-2.83853	3.3626	3.75987	2.15913	2.51281	0.185078
1387	-0.660727	-0.999044	0.430586	0.509347	-0.828275	0.115392
1388	-1.51749	0.265285	-3.3609	0.701968	0.685343	-0.726895
1389	0.129236	0.22989	-1.30907	-1.01198	1.11189	0.0396075
1390	0.836614	-0.443245	-0.312196	-0.370786	-0.41315	-0.358306
1393	0.948442	1.0113	0.582078	1.29778	0.156805	0.799784
1396	-0.481531	0.185216	-0.0273912	-1.03964	-1.31073	-0.538502
1397	-0.352735	0.0619945	0.225237	-0.804342	-0.217991	-0.305536
1398	0.151277	0.127208	0.113287	0.267467	0.26198	0.185137
1399	0.0322838	-0.0318256	-0.00339273	0.074992	0.0331837	0.0219412
1400	-0.869731	-0.839749	2.13562	0.500634	-1.72399	-0.232588
1401	-0.938987	2.64444	-0.626718	-0.351731	-1.18292	-0.600614
1407	-0.288017	-0.456418	-0.60914	-0.329018	-0.312352	-0.398096
1408	-0.377348	0.0410957	0.510414	0.209145	-0.268606	-0.0737782
1409	0.498806	-2.65761	2.36414	-0.218855	0.608264	0.174107
1410	0.279561	0.26524	0.194517	0.201219	0.63022	0.313158
1416	-0.130103	-0.377932	-0.394816	-0.185592	-0.171112	-0.251002
1417	-0.696964	0	-0.049066	0	0	0.221289
1427	0	0	-0.356593	-0.66866	0.319851	-0.423172
1428	0.607543	0.411456	2.90225	0.431264	0.825031	1.03362
1429	0.519269	0.618701	0.501402	0.566516	0.623563	0.566783
1431	-0.0901226	-0.104438	-0.772469	0.644436	1.6323	-1.10998
1432	0.102228	-0.352838	-0.276156	0.4923	2.28357	1.23773
1434	-0.150173	-0.207864	-0.34644	-0.212658	-0.189062	-0.220346
1435	-0.744899	-0.446839	-0.416677	-0.740242	-0.158507	-0.37014
1436	-1.1105	0.552764	0.103676	1.36641	-0.309588	0.0633955
1439	-0.832727	-0.331669	-0.74726	0.363571	-0.150916	-0.338594
1445	-0.124396	1.49438	0.139957	0.201639	-0.226128	1.28357
1452	0.58124	-0.329331	-0.580084	-2.15133	0.488028	-0.175236
1453	2.32566	0.107233	0.553979	0.55702	0.669432	1.14054
1454	0.358968	0.443615	0.584979	0.735571	0.291689	0.355342
1455	1.56388	0.074539	2.46026	0.0906416	0.0966119	1.27208
1456	2.81734	1.5019	-2.99413	-2.38483	-2.05151	1.65264
1457	-2.22989	-0.349603	-0.512003	-0.543126	-3.1315	-2.22624
1459	-0.1776	-0.21232	1.17455	4.02989	-0.250072	-0.151864
1460	-0.277701	-0.229953	-2.33989	-2.2191	-0.158105	-0.852977
1462	-0.84551	-3.39855	0.266954	-0.520965	-0.814235	-1.00506
1464	0.0381744	-0.150807	0.643413	-0.333432	-0.499958	-0.0601128
1465	-0.144774	-0.296742	-0.326876	-0.271333	-0.154284	-0.237909
1466	1.02014	0.144442	0.982477	-0.187595	0.166533	0.366926
1468	-0.616712	1.55948	-0.441277	-0.343743	-0.500497	-0.317464
1471	0.0784198	0.176988	0.435151	0.172851	0.102577	0.19409
1474	-0.437242	-0.531672	-0.298622	-1.30037	-0.742063	-0.661802
1475	0.483841	0.495775	0.371069	0.23526	0.208101	0.359696
1476	0.147054	-1.00225	0.197627	-0.307131	-0.0540639	0.0540567
1477	-0.153387	-0.308071	-0.727098	-0.177862	-0.41949	-0.104287
1478	-0.167649	-2.8041	-0.161683	-3.94474	-0.153913	-2.61108
1479	-1.26425	-1.0964	-2.47132	-2.02367	0.147384	-0.978694
1486	2.39453	-1.97326	-0.38344	-0.421295	-0.45472	-0.298459
1487	0.176338	0.174523	0.451969	0.178381	0.140433	0.140859
1488	2.49001	-5.97845	1.32992	-2.96018	-2.3963	-2.31238
1489	0.381951	0.450827	-0.0739722	2.49206	0	0.911812
1490	0.0227353	-0.323887	-0.194967	-0.0521524	-0.0361494	-0.115991
1491	0.45451	0.258022	0.203327	0.0778607	0.296973	0.259033
1493	-0.247226	0.763206	0.73043	-0.176037	0.343127	0.0865063
1495	-2.45127	2.16711	-1.97001	0.282008	-1.83279	-0.482367
1497	-0.496229	2.72318	-0.336936	2.3917	2.4826	0.843383
1499	0.433371	4.08423	-0.636596	-0.277162	-0.888342	-0.380827
1500	-3.44514	-0.348271	1.25779	1.98619	-0.401336	-0.321277
1503	-1.03229	-0.327052	-0.263179	-0.751411	-0.468714	-0.729723
1506	-2.58574	-0.958381	-2.96715	2.3774	-1.26913	-1.36592
1508	-0.4921	0.567485	0.44062	0.965195	-0.912266	0.829395
1509	2.85074	0.281367	0.482833	0.31534	0.51862	0.254986
1510	-1.49919	-1.78278	-1.46524	-1.49197	1.07168	-0.435822
1512	-1.54184	-4.10066	0.318571	3.85703	-3.80191	0.858611
1513	1.28633	-0.869318	-2.50827	-0.271221	-0.731692	-0.962704
1514	0.378085	0.531637	0.336484	0.314906	0.353314	0.383778
1519	-0.458523	2.74876	0.209756	3.0424	1.57355	1.4556
1520	0.462065	-0.248589	0.775172	0.288651	0.273077	-0.722815
1521	0	-2.32355	0.214794	-0.450864	-0.60639	-0.823206
1522	-0.980702	2.93221	0.319373	0.150144	-2.72146	-0.504624
1523	-0.371356	-3.86925	2.73193	2.20388	-2.20516	-0.999895
1525	-0.236123	-0.261514	-0.54974	-0.249302	-0.199222	-0.180604
1528	-0.308584	-0.213204	0.660873	-0.28368	-0.232201	-1.19522
1534	0.203075	0.421174	0.321289	0.843818	0.233745	0.380872
1535	0.0767818	-2.77342	-0.714457	-2.42156	-0.218122	-1.16449
1536	0.0618549	-1.16464	-0.0667606	-0.077889	0.324357	-0.183911
1537	-0.115368	0.0767965	-0.265812	-0.200199	-0.0333115	-0.129747
1540	0.809909	0.323663	0.561922	0.716659	0.788	0.647842
1543	1.02183	2.01802	2.86154	2.88687	-1.46435	0.656439
1544	-0.199386	0.678375	0.136055	0.604794	-0.116614	0.221442
1545	0.196293	0.0906366	0.155588	0.222252	-0.0210167	0.129636
1548	0.55416	0.139201	0.237229	0.209886	0.360671	0.301124
1549	0.977885	0.134352	-0.908926	0.283289	0.233101	0.341221
1551	0.304873	0.550012	0.0247055	0.589828	0.326096	0.692666
1555	0.178386	-0.393794	0.142574	0.186293	0.187764	0.152607
1556	0.185004	-0.121391	0.124223	0.135606	0.308523	0.127296
1557	0.273042	0.325133	0.849293	0.688521	0.821746	0.592491
1558	-0.631377	-0.292065	-0.279465	3.4508	-0.383551	-0.358578
1559	0.332786	0.355003	1.16059	0.904259	0.144277	0.253798
1562	0.102122	-0.0355919	0.0954886	0.0324726	0.199937	0.15065
1565	0.462407	0.352106	0.462229	0.365944	0.365487	0.281814
1571	0.310619	0.228871	0.283553	0.240876	0.218444	0.257365
1573	0.424115	0.251245	0.433411	0.242854	0.346204	0.340459
1576	0.511721	2.11428	1.21913	0.857864	0.354853	1.3826
1577	1.04579	0.870635	0.871982	0.905071	0.900532	1.13556
1579	-1.28785	-0.354036	0.191815	-0.497281	-0.156823	-0.725974
1582	-0.0689608	0.245728	0.516283	0.271765	-0.220416	0.149771
1583	0.196504	0.411118	0.292578	0.0874653	0.208051	0.240039
1589	-0.900999	2.22783	1.683	2.70867	-2.21782	-1.59555
1592	-2.19614	-7.2189	-2.66459	-3.32882	-3.3655	-3.97049
1593	0.14912	0.212305	0.242563	0.227847	0.280824	0.186518
1594	0.898557	0.318739	-2.9879	-1.04957	-1.77837	0.783861
1595	0.77639	1.12164	0.899686	1.17871	0.765547	0.949287
1600	2.04572	-1.92532	0.310819	0.0622527	-2.15007	-0.836163
1601	-0.461728	-0.481324	0.22732	0.242261	-0.34567	-0.72439
1603	0.109342	-0.67785	0.434709	0.880604	0.590418	-0.212453
1604	0.231164	-3.32517	0.934625	1.16502	2.41678	0.220523
1605	-0.128188	-1.97005	-2.80655	0.105659	-2.84686	-1.33976
1606	2.20361	-3.55628	1.65405	-0.794655	-1.7141	-0.998023
1608	0.845167	0.518723	0.461633	0.355607	0.614201	0.559945
1609	-0.0383096	0.639201	4.74873	0.492201	0.594933	0.493643
1610	-0.572437	0.158664	0.140331	-0.55813	-0.384589	-0.139962
1611	-0.307019	-0.0433898	0.0615181	0.0832351	0.631507	0.15261
1612	8.5499	-0.955411	-2.00601	-4.42584	-2.50446	-0.529309
1613	-0.528767	-0.189957	-0.499913	-0.135852	-0.236352	-0.288131
1615	-0.12024	-0.18906	-7.18259	-0.212525	-0.134628	-0.165337
1616	0.966836	0.534231	0.44342	0.624913	0.683111	0.434857
1621	-0.0766254	0.368414	0.358142	0.122326	-0.608515	0.0332868
1622	0.163591	0.211402	0.205909	0.149801	-0.148129	0.161349
1627	-1.74131	0.303857	0.305074	0.337063	0.426928	0.293508
1628	-1.63903	1.08727	2.89209	2.45183	0.575133	0.866648
1629	0.375011	0.249244	-0.567034	0.119894	0.0778122	0.0446094
1630	-0.111551	-0.0946997	-0.504489	0.276978	0.15888	-0.0539477
1632	0.266676	2.25634	0.258284	-0.126973	0.107313	-0.139129
1633	-0.0947288	-3.55162	-0.408175	-0.57966	-1.60182	-1.73701
1634	-0.619832	-2.41366	-1.88738	-1.04035	-0.497774	-0.918086
1635	0.154906	0.237037	-0.46653	-2.18688	-0.198974	-0.101761
1636	-0.762897	-1.59438	-1.36688	2.53684	-0.948816	-0.7748
1639	-0.644769	-3.76282	2.24558	-1.95653	0.483818	0.792249
1641	3.4989	-0.0188612	3.19039	1.35649	-2.60618	0.182084
1642	-0.0898538	-3.26644	-4.06526	-1.20457	-0.674266	-0.0927768
1643	0.498963	0.242002	0.819608	0.229046	0.368467	0.302499
1644	0.178162	0.199862	0.473165	0.168613	-0.125719	0.0798695
1645	0.567542	0.451344	0.428782	0.338604	0.376044	0.941641
1646	0.351481	0.700911	0.87892	0.552552	0.644646	0.461352
1647	0.223633	-1.20432	-1.41164	-1.90165	0.357596	0.13071
1649	0.966749	0.617438	0.739116	0.949913	0.776046	0.689478
1650	0.299553	0.328977	-0.832382	0.221018	-0.0686619	-0.192014
1652	1.04378	0.10545	0.18979	0.440428	0.0399519	0.819307
1653	-0.182094	-0.202206	-0.299091	-0.224071	-0.178673	-0.216334
1654	3.93382	-2.38793	2.47696	-3.64317	-3.97959	-2.07575
1655	0.286858	0.226795	0.443411	0.319842	0.322565	0.226054
1656	-1.2289	-1.26034	-0.930907	-0.535617	0.119698	0.191803
1657	-0.164933	-0.4194	2.78511	-0.294725	-0.651893	-0.325833
1659	-3.48718	-0.21104	1.27775	-0.851926	-0.139483	-0.191416
1660	2.18796	-0.131015	-0.27	-1.71784	-0.110428	-0.128524
1662	0.627219	-0.191149	-0.325277	-1.44457	-0.140397	-0.164642
1663	-3.76243	-2.1534	-3.7065	-3.70789	-0.926317	-2.12553
1665	0.0855592	-0.60755	-0.165593	2.75491	0.0719501	-0.119681
1666	1.12118	0.146031	0.337825	0.139088	0.611825	0.148739
1672	0.0190062	-0.184655	-0.161637	-0.331767	-0.345927	-0.220347
1673	-0.165222	0.0355717	-0.717157	0.634986	-0.257274	0.0569957
1676	-0.19251	-0.185297	-0.313834	-0.211085	-0.216812	-0.22247
1677	2.54159	-0.277213	-1.61605	-0.152803	0.336713	-0.348774
1678	-0.609161	-0.533423	-0.520158	-0.393415	-0.365484	-0.483439
1687	2.89351	0.100555	0.256601	-3.7873	0.295468	-1.61376
1690	-1.46711	-0.705265	1.80414	3.85634	1.21426	1.40364
1716	0.306223	-0.246944	0.470486	-1.91955	0.270616	0.191483
1717	0.762385	1.1607	0.906509	1.22025	0.651523	0.941166
1718	-0.182973	-0.091222	-0.648097	2.60535	-0.169813	-1.06892
1719	-0.386831	-0.35124	-0.12406	-0.585939	-0.474901	-0.383702
1723	-0.327771	-1.35137	-0.757349	0.468037	-0.540715	-0.805997
1725	-0.0626344	-2.39713	1.04002	-0.47118	0.421101	-0.596455
1727	-0.935235	-0.351435	-5.74988	-3.85337	-1.21815	-1.51224
1728	0.28494	-0.445146	-0.11091	-0.323931	-0.168694	-0.305597
1729	-0.208078	-0.280809	-1.20951	-0.194644	-0.173963	-0.228866
1730	-0.319508	-0.428046	-0.714217	-0.22122	-0.439269	-0.423561
1731	-1.85222	1.06951	1.91541	-0.702222	0.85496	0.261242
1733	-2.47862	3.92571	2.28266	-1.3662	-1.61555	0.301671
1735	-0.816526	-2.27161	-0.60792	-2.91325	-1.86652	-1.70301
1736	-0.299736	-0.310473	-0.389582	-0.228782	-0.330043	-0.31083
1737	0.167114	0.436096	0.364072	0.663179	0.308062	0.237064
1738	-0.113369	-0.211942	-0.733305	-0.232468	0.164975	-0.242047
1739	-4.05983	-0.820824	-8.39485	-0.651723	-0.49375	-0.664366
1741	-0.953199	-1.51351	0.402936	0.52708	1.43166	-0.353473
1743	-0.551812	-0.125711	-0.163908	-0.111339	-0.125579	-0.110607
1756	-3.30201	-1.48234	-5.57895	-3.93037	-1.02752	-3.24795
1757	-3.73462	0.31424	-1.67084	0.325585	-0.242316	-1.29992
1759	-0.946765	-4.98049	-1.97161	1.05956	0.307731	0.0807654
1760	-2.36589	2.38622	3.53302	1.42879	-1.89651	0.971509
1762	1.48302	-0.777681	0.643739	-0.340092	-1.96736	-0.314598
1763	-0.35892	-0.131771	-0.22076	-0.532949	-0.569397	-0.361919
1767	-0.303433	0.22626	-0.355074	0.204888	-0.164554	0.214243
1768	-0.687623	-0.751542	0	-0.39431	-0.428346	-0.72461
1769	-0.371284	0.367097	0.208459	-0.020912	0.195793	0.076846
1773	-0.308569	-0.35952	-1.00578	-2.33665	-1.38357	-0.92199
1774	-0.587287	1.02918	-0.285443	-2.34541	1.24975	0.0664612
1776	0.755757	0	0.905477	-0.0312118	0.593103	0.414275
1777	0.382096	0.268071	0.384456	0.341395	0.165404	0.309175
1778	-0.29456	-0.600045	0.593959	1.53676	-5.04562	-1.37886
1780	-1.02536	1.77198	-0.272772	-1.65614	-0.897571	-0.984277
1781	-0.378823	1.84931	-0.286597	4.67973	-0.182363	-0.198025
1783	-0.196837	-0.184394	-0.198578	-0.188709	-0.204238	-0.193658
1785	-0.319933	-0.263484	-0.504287	-0.410307	-0.503743	-0.316747
1786	-4.342	-4.11592	-0.568643	-4.50361	-0.850618	-2.13132
1787	-1.52916	-0.723935	-0.635701	-0.9445	-2.16608	-0.755491
1788	-2.89562	0.470548	0.387769	0.939335	1.79242	1.33875
1789	-1.45369	-1.84076	-2.38377	-3.45321	-4.90721	-2.42619
1793	-0.207771	-1.0044	-0.345824	-0.29401	-0.539018	-0.194708
1794	-1.81689	-1.65206	-0.884072	-1.54379	1.28052	-0.774447
1795	-0.601855	0	0.0546636	-0.101278	-0.980586	-0.418708
1796	-0.865142	-2.05384	2.99675	1.89616	1.84273	1.75248
1797	2.34956	2.24237	0.610479	2.11829	-2.66614	-0.863713
1798	3.16969	0.423893	0.313505	4.99244	2.62086	0.128811
1801	1.02056	0.301868	0.446616	3.29585	2.20042	-0.45711
1802	-1.96694	-0.161442	-0.273627	2.93522	-0.0800983	-0.13218
1803	0.418008	-3.50504	0.928265	-0.153439	0.1331	0.331611
1804	0.317468	-0.309939	-0.506687	-0.796779	-2.21331	-0.71537
1805	-0.116851	-1.03713	0.182645	-0.165521	-0.736752	-0.374565
1806	-0.13596	-0.92041	-0.096505	-0.0220358	-0.275533	-0.109581
1807	-0.261694	0.109876	0.132113	-1.51051	-0.150973	0.124732
1808	0.0247586	0.360562	0.530344	0.448632	0.0974598	0.293242
1809	-0.435917	-3.81078	3.11984	-1.91087	-2.73225	-0.649488
1810	0.248698	0.0902865	-0.0110019	0.158498	0.141196	0.126428
1819	2.38129	-1.79867	-0.0685514	1.81703	-2.5802	1.04038
1820	1.02334	-0.998349	-1.58818	-0.0936609	1.48463	-0.0376796
1822	-0.73489	-0.645991	0.2574	0.384851	0.228354	-0.243703
1824	0.124353	0.157173	0.206419	0.144426	0.249342	0.171531
1825	0.738512	0.563941	-1.21078	1.11106	2.9544	1.28555
1827	-0.349636	-0.311062	-0.354872	-0.183432	-0.228429	-0.811514
1828	-0.218007	-0.16969	0.495546	1.59094	1.13932	0.568802
1829	0.0516411	1.32211	-0.167167	0.230106	0.101481	-0.660422
1831	2.06949	-0.270296	0.394104	0.664068	2.19146	1.17939
1832	-0.174993	0.22211	0.377739	0.239526	0.288952	0.28491
1836	-0.167727	-0.111337	-0.332653	-0.242542	-0.137696	-0.197496
1837	-1.73915	4.23559	-5.44328	-2.9526	-0.485697	-1.6269
1838	-2.01144	-0.277112	-3.56089	-0.219915	2.37053	-1.13597
1839	-0.214217	-0.897569	-0.868785	-0.642509	-0.200598	-0.563837
1840	1.1384	0.726977	1.15529	1.56587	-0.414627	0.57381
1841	-0.0798153	-1.11693	-1.40885	-0.18146	-1.01752	-0.595777
1842	0.135585	0.256627	1.00616	0.26061	0.535083	0.496671
1843	0.144313	0.0752234	0.0484449	0.176682	0.150732	0.119972
1844	-0.184294	0.220526	-0.545469	0.449807	1.66486	0.186306
1845	0.070236	0.113781	0.552419	0.122508	0.141751	0.0962762
1846	0.211113	0.441427	0.317571	0.0248006	0.311203	0.262138
1847	0.0354427	-0.301351	-0.0817102	0.0490501	-0.11138	-0.0810975
1848	-0.289174	-0.304553	0.423009	0.32208	-2.09476	-1.10865
1849	0.0479255	0.0520536	-0.00596091	-0.00170275	0.142759	0.0479142
1850	0.427675	1.67609	3.13748	0.214661	0.359758	0.185331
1852	-1.36328	-0.861588	1.0792	1.25612	-1.09097	0.492837
1854	-1.34606	-0.951535	-0.802452	-1.74274	-1.60492	-1.28874
1855	-0.195199	-0.173168	-0.300473	-0.239733	-0.861906	-0.163051
1856	0.479699	0.75185	0.492088	0.542405	0.632212	0.580547
1857	-0.145725	-0.137239	0.274776	5.40523	0.220876	0.158101
1859	0.487185	0.254584	0.51021	0.635655	0.316834	0.197474
1861	0.223666	0.123058	-0.741268	0.13527	0.192385	0.143787
1869	-0.50637	-0.548443	-0.872289	-1.05435	-1.00257	-0.795937
1870	-1.45576	-0.64939	-1.25217	-1.71875	-1.44148	-1.30248
1871	-0.176982	-0.300522	-0.435623	0.222063	-0.161309	-0.293249
1874	-0.24914	-0.211874	-0.245662	-0.14995	-0.211935	-0.212819
1875	0.183942	-1.30092	1.28526	1.69265	2.94801	0.41707
1876	0.513559	0.124398	0.453636	0.313552	1.00679	0.258052
1877	0.997483	0.573042	0.945786	0.159408	0.528871	0.0710985
1879	-0.0493593	0.380563	0.0942818	-0.236518	0.130787	0.0649068
1880	-0.307292	-0.722726	-0.227902	-1.11701	-0.157597	-0.505503
1889	-0.135993	-0.230666	-3.60559	-2.14587	-0.718407	-0.744424
1890	-0.410596	-0.298631	0.769021	-0.341432	-0.343412	-0.297231
1891	0.56671	0.595447	0.649088	0.640585	0.515757	0.59441
1892	-0.09164	-0.0116273	0.0733575	-0.106317	-0.0538644	-0.0371251
1893	0.660862	-0.45883	1.01562	1.38668	0.675163	0.65627
1894	-0.182976	-3.61599	-4.38192	-0.439203	-0.357878	-0.245364
1896	-1.49699	3.18044	2.45337	0.0488607	2.90142	1.46559
1901	0.415517	0.1494	0.441108	0.344314	0.370613	0.345084
1902	1.04397	0	-0.810661	0.707902	0	0.088325
1903	-0.249703	-0.126792	-0.155055	-0.274474	-0.320993	-0.224513
1906	-0.142944	-1.05639	-0.83348	-1.18155	-0.225716	-0.687125
1907	-1.64433	-1.74717	-0.804929	-2.85793	-1.99887	-1.80957
1909	-4.07438	0	0.823541	-0.927632	0.20032	-0.709121
1910	1.58225	0.843715	0.503834	1.07484	-0.319694	0.948166
1911	-0.893161	4.03933	-4.24387	3.30823	0.228533	-0.160384
1912	-0.0716109	-0.681248	-0.750496	0.731288	-0.0930225	-0.569697
1915	0.409661	0.404091	-0.504344	0.227138	0.334324	0.261969
1917	0.279909	2.30776	-0.453475	-0.0344355	0.487442	0.519895
1933	0.145879	-0.230423	-0.188922	-0.865764	-0.25018	-0.1422
1936	0.14681	-2.80742	0.268893	1.24098	5.25579	1.34836
1937	0.0493905	-0.482547	-0.48887	0.33416	-0.701091	-0.301168
1938	0.190172	1.46107	4.56387	0.695519	-1.73362	0.0634576
1939	0.132887	0.146264	-1.12354	0.0838012	0.0684348	0.0856957
1942	0.0686549	0.156199	0.303094	0.488605	0.284163	0.197978
1943	0.0940993	0.224797	0.351317	0.295099	0.0114451	0.196212
1944	2.20065	0.111148	1.05593	1.41349	1.92974	0.753374
1945	0.419651	1.52978	0.820941	0.421931	0.504037	0.474039
1946	-0.431927	0	-0.0892537	-0.583655	-0.423209	-0.321766
1947	-0.0137537	0.20881	0.235494	0.202657	0.208565	0.169248
1948	-1.81778	-0.869735	-0.176314	0.411946	-1.09975	-0.187331
1951	1.35232	0.83565	1.23787	0.771046	0.802594	0.797675
1952	0.534252	1.09242	0.62842	0.318965	0.223331	0.23734
1953	2.99025	-0.654401	0	-1.22536	-0.338088	-0.0520306
1954	-1.9459	2.67721	0.600725	3.2658	0.23264	0.285032
1955	0.0418788	0.06447	0.13716	0.221556	0.0106832	0.0960421
1956	-0.174254	-0.157089	-0.625556	-0.733288	-0.194142	-0.591112
1958	0.168465	0.019985	0.45695	0.463721	-7.72e-05	0.222693
1959	-0.0446734	0.499064	0.346043	-0.0575824	0.0293058	0.155299
1960	-1.18465	0.117362	0.399665	-0.163549	-0.402581	-1.07828
1962	-0.0687884	0.100552	-1.91505	0.48617	-2.74085	-1.22343
1964	-0.0893952	-0.276349	-0.360248	-0.225408	-0.155341	-0.192194
1965	-0.207735	-0.313433	-0.427734	-0.33032	-0.213256	-0.277082
1967	-0.170429	-0.171927	-0.248166	-3.88065	-0.106201	-0.162709
1968	-0.146409	-0.152802	-0.134396	-0.20388	-0.199022	-0.166409
1969	-0.0630488	-0.31201	-0.307459	-0.154068	-0.0687742	-0.180179
1973	3.10635	-2.91471	-0.148705	-0.599529	0.311066	-1.66961
1974	0.140981	-2.084	0.399723	0.304884	0.275998	0.0761407
1975	0.695193	1.5304	-4.21504	2.06978	1.00793	0.577462
1977	1.3608	-0.23665	-0.406017	-0.255457	-2.95465	-0.153698
1978	0.23449	0.049804	0.197929	-0.00949813	0.16289	0.128016
1979	0.0779067	0.0161638	0.035821	0.165913	0.118249	0.0837039
1981	-0.302966	3.6036	1.02688	-0.838624	-0.376959	-0.24832
1982	2.03047	-2.22069	-0.354972	-0.84672	4.49558	-0.166379
1983	0.165898	0.237954	-0.936675	0.496221	0.187289	0.287072
1984	0.877323	-0.401391	-0.506971	-0.554475	-0.287037	-0.388815
1992	-0.163077	-0.188922	-0.206929	-0.345441	-0.271162	-0.234213
1994	-0.0232273	-0.11189	-0.570218	-0.0918918	0.178574	-0.0741656
1997	0.241962	0.15994	0.2817	0.193858	0.279222	0.232229
1998	0.341084	-0.179318	-0.320406	0.789588	1.17403	0.37255
1999	0.744499	0.753559	0.611653	0.479883	0.24786	0.715187
2000	0.38902	0.415967	0.559713	0.442746	0.432291	0.450516
2002	0.327071	-0.150202	-0.283925	-0.264363	-0.289696	-0.131004
2004	-0.232555	-0.420976	-0.35581	-0.262192	-0.23997	-0.301409
2005	0.047717	1.35746	0.15013	0.163557	0.143721	0.0751278
2006	-2.63584	1.02675	-1.67011	-2.14395	0.601274	0.111642
2009	0.708292	2.34119	0.414144	0.169727	-2.32892	-0.210779
2010	1.09732	2.82698	-2.59753	-0.0945665	-2.00592	0.739932
2011	-0.536932	-3.89199	0.50982	0.818288	0.563613	0.212177
2012	-0.658358	-0.6493	-0.439889	-0.516184	-0.496735	-0.551203
2013	0.157038	0.0942671	0.404278	0.204108	-0.196235	0.173961
2014	0.517703	0.460533	0.543681	0.352374	0.442563	0.464264
2017	-0.39105	-0.206203	-1.17999	-0.417381	-0.272949	-0.229035
2018	-0.545545	0.243948	-0.0424195	0.410458	0.556422	0.126544
2020	0.516506	1.00803	1.18434	0	0.270007	0.760329
2021	0.199492	0.332186	0.381001	0.167413	0.234479	0.263807
2022	-0.327445	-3.94624	-2.10905	-1.3828	-0.372716	-1.298
2023	0.612296	-0.310112	-0.935634	-0.378536	-0.221181	-0.286478
2026	0.357121	0.227265	0.392707	0.860706	0.543017	0.476317
2027	-0.923695	0.654723	-2.71549	-0.130302	-2.83615	0.388344
2028	-0.134583	-2.26672	0.118512	2.45763	0.0625698	0.271344
2029	0.630558	0.139497	0.785042	0.841701	0.328028	0.519766
2030	0.514507	0.423389	0.574774	0.352253	0.465093	0.466896
2033	-0.0778959	1.92288	0.990385	0.193647	-1.3561	0.241511
2034	-0.421429	-0.212773	-0.278148	-0.198792	-0.43306	-0.307948
2035	2.99242	1.96102	-0.768614	-1.93697	-1.70102	-0.48867
2036	2.2412	0.989634	-3.62126	0.972301	-2.15309	-0.75648
2037	-0.373296	-0.425217	-4.47605	-0.488783	-0.372142	-0.383146
2039	0.354014	3.82921	4.48532	3.79746	-4.03967	0.358616
2040	-0.239413	-0.224326	-1.00458	-0.137448	-0.363523	-0.213395
2041	-0.177986	0.157601	0.22947	-1.015	-0.195642	-0.384807
2042	-0.796253	0	0.310003	0.342028	-1.13211	-0.611175
2045	-0.381341	-0.0461175	-0.286417	1.01319	-0.372449	-0.0139527
2047	1.06461	1.13041	1.13252	-0.209016	0.753372	0.646018
2048	-0.349309	-0.452708	-0.699542	-0.859152	-0.357312	-0.542717
2049	0.695294	0.264173	0.455987	-0.768631	-0.662739	-0.00437566
2050	-4.63874	0.336595	0.238435	0.256732	0.135926	0.210977
2051	-0.44055	-2.8009	-0.655228	-0.975734	-2.05434	-0.91344
2052	0.192434	0.174276	0.284213	3.71259	0.203973	0.171632
2053	1.76851	-2.73216	-0.37782	-0.317299	-3.2734	-1.47194
2054	2.26687	-1.79278	-0.336574	-0.0884622	1.19601	-0.275417
2055	-3.47089	1.76892	-2.33295	0.977774	2.75097	-0.808349
2056	-1.76238	-1.51373	-0.508671	-1.81935	-2.04375	-1.52876
2057	-0.0585935	0.655691	1.06141	0.797468	0.943998	0.681019
2058	-2.11441	-0.0732904	-2.53568	-0.0921591	-0.0661262	-0.0441185
2059	-0.614745	-0.359231	-4.58253	-3.5103	-0.637602	-1.84318
2060	1.19599	-0.208683	0.326104	-0.418152	-0.414258	-0.13215
2063	-0.0206568	1.0744	-0.0295794	-0.675819	0.315524	0.233371
2064	0.317724	0.268696	-1.16017	0.686214	0.323791	0.334306
2065	0.278668	0.533364	1.02243	0.809005	0.44048	0.617678
2067	-0.375475	-0.77423	-0.518644	-0.355048	-0.678056	-0.469592
2068	-0.552095	-1.95387	-0.694103	-0.508457	-0.348426	-0.382738
2069	-1.68449	-0.247495	-0.395838	-1.35637	-1.61648	-1.05932
2071	-1.48743	1.37784	-1.37765	0.767341	2.44593	0.90021
2072	-1.23231	4.15512	0.161096	-0.149887	0.2054	0.0964856
2073	-2.14935	5.33839	2.38092	0.316525	1.581	0.104275
2074	-0.219228	0.474459	-0.616762	-1.23829	-0.729043	-0.32336
2077	0.216932	0.144362	0.157646	0.146255	-2.39499	-2.24919
2078	-1.36121	-1.63316	1.08263	-4.05048	-0.0649746	-0.769897
2079	0.0503246	-0.195244	-0.1964	-0.267268	-0.153758	-0.151576
2081	-0.174673	-0.20888	3.53054	0.356608	-0.209215	0.216298
2086	0.274444	0.565959	0.423409	0.337083	0.129963	0.347046
2091	-0.145535	-0.132821	-0.806619	-0.405068	-0.509824	-0.27655
2098	-0.51849	-0.363328	0.939701	-0.131483	-0.284546	-0.176695
2099	1.42126	-3.61345	-3.40042	4.76656	-3.17221	-0.81192
2101	0.363115	0.215267	-0.290293	-2.8502	4.2438	0.0828746
2104	-0.183109	-0.233545	-0.817071	3.30061	0.448868	0.504415
2107	-0.115069	-0.213896	-0.648253	-0.209713	-0.118263	-0.28041
2108	0.458368	0.182333	0.254972	0.200252	0.15125	0.319954
2109	0.0961921	0.155703	0.257351	0.888136	2.17597	0.133864
2110	0.197528	0.483736	0.377686	0.217424	0.203018	0.206891
2113	-3.68305	-0.104536	-0.280485	-0.212667	-3.53783	-0.0910435
2114	0.351119	0.0760382	3.61123	0.149703	0.547642	0.381605
2115	1.1993	2.69398	-3.67691	3.19193	1.58094	1.41098
2116	-1.68627	-2.31549	0.89214	0	0.631039	-0.0622997
2117	0.645919	-0.0677526	-0.110311	-0.276611	-0.436208	-0.0267949
2118	1.17457	1.22188	-0.508946	1.17663	-0.104365	0.648862
2119	0.0456998	0.0742483	-0.0135125	0.181617	0.115315	0.0815675
2120	-0.047621	0.037721	0.344701	0.219815	-0.113556	0.0891008
2121	0.953647	0.344658	0.416926	-1.41666	0.231131	0.195651
2122	-2.57999	-2.8026	1.6332	1.05812	0	-1.13795
2123	0.248541	2.27861	-0.417362	0.515457	0.992107	0.735086
2124	-1.03613	-0.00470301	0.39149	1.3175	-0.475785	0.0383229
2130	-0.0760265	-0.169401	0.660686	-0.232124	-0.165696	-0.152408
2131	-0.151352	-0.135748	0.246372	-0.0689628	-0.13018	-0.208726
2132	-0.868164	-3.49729	-5.55441	-0.2474	-0.213238	-1.8577
2134	-0.534947	0.464022	0.990744	0.886687	0	0.477693
2135	0.561389	0.293757	0.637303	1.10644	-2.02416	0.278702
2137	-0.307355	-1.53751	-2.38619	-0.586803	-1.53473	-1.27173
2139	2.34838	-1.0766	-0.567815	-3.74208	0.94999	-0.532001
2140	-0.201513	-4.03338	-0.440826	0.182008	-2.46197	-0.57203
2145	0.146614	0.328643	0.353365	4.98052	0.203227	0.267821
2146	-2.4836	-3.95331	-3.82982	1.74735	-2.60112	-0.890914
2147	0.0934172	0.245193	0.379209	0.234352	0.145499	0.220427
2149	-0.597396	0.378946	0.126384	-0.16731	-0.267002	-0.104386
2150	0.187402	0.417655	0.290198	0.364862	0.160907	0.285096
2151	0.185607	0.347852	0.291717	0.30743	0.48606	0.32464
2152	-0.497738	-0.327908	-0.205066	-0.548059	-0.0744501	-0.329714
2153	-0.263142	0.099946	0.511622	3.31725	-0.301846	1.14103
2155	3.0128	0.360846	3.98607	0.331064	2.77969	0.177702
2157	0.418287	0.331078	0.22683	0.339956	0.316582	0.327437
2158	1.08363	0.107904	0.0683963	0.0128255	0.0498227	0.0551133
2159	0.370196	0.376681	0.551679	0.328121	0.380925	0.402411
2160	1.19512	0.330679	0.307537	0.223379	0.212605	0.219391
2161	0.236034	0.289036	0.407808	0.212696	0.2088	0.271767
2162	0.144477	0	0	0	-0.405565	0.219764
2165	-0.545956	-0.384763	-0.306883	-0.54295	-0.550045	-0.465228
2166	0.379994	0.445641	0.402309	0.491963	0.376957	0.420263
2168	-0.195079	0.191611	0.464506	1.81585	-0.488713	0.453722
2170	-0.545676	0.386761	1.87057	0.306679	1.29359	0.707126
2171	0.128435	0.326452	0.057461	0.289371	0.225042	0.20625
2175	-2.09321	4.52283	0.77862	0.474823	3.04851	0.683416
2176	-0.270777	-0.130342	-0.575036	-2.07588	-0.427528	-0.126733
2177	-0.84858	-0.533277	-3.55882	-1.00276	-0.791389	-0.762685
2178	0.277338	3.10371	0.0466591	0.352705	0.347486	0.263835
2180	0.282478	0.821101	1.0372	0.450277	0.651211	0.866904
2181	-0.519144	0.0708262	-1.90679	-0.539908	-0.793347	-0.305382
2182	0.360399	1.80776	3.22904	4.42636	-0.316731	-1.34054
2184	0.539633	0.379152	0.227027	0.179585	0.344088	0.306749
2185	0.457299	0.738313	-2.74199	0.497948	0.293475	0.33186
2186	-0.404817	1.08745	0.857062	-0.598793	-0.173126	0.278079
2188	0.0652282	0.12442	0.0325444	0.0479997	0.00167203	0.0552645
2189	-0.170254	-0.459027	-1.39125	-0.965387	-3.80181	-0.63002
2191	-0.825575	0.759916	-0.511948	-1.6696	-0.251379	-0.497586
2192	-0.74433	-1.35815	-0.925387	-0.682682	-0.382155	-0.443411
2193	-0.228628	-0.234595	-0.331049	-0.225968	-0.298128	-0.262781
2194	-0.454472	0.200078	3.80082	0.221705	-0.228146	-0.306953
2195	0.383538	0.503334	0.939145	0.503984	0.33789	0.409361
2197	0.265148	0.0955205	0.839055	-0.399924	-0.373764	0.0504832
2200	-0.689808	-0.751292	0.354188	-0.537712	-0.513531	-0.476426
2202	-0.917618	-0.872864	-1.83534	2.82957	-2.51162	-0.973832
2203	0.308463	0.199108	0.274572	0.254277	-0.0648791	0.129982
2207	-0.401326	-0.509513	-0.520198	-0.183363	-0.31764	-0.385512
2209	0.63684	0	0.523961	0.553199	-1.12068	-0.0896697
2212	1.62527	0	1.43449	-0.279738	-0.879447	0.441069
2214	2.01536	-0.277677	-1.7252	-1.0801	1.1537	-0.531828
2217	0.201021	0.360438	0.418358	0.302718	0.184407	0.29428
2218	-1.38394	2.02298	0.85013	4.22657	-1.13798	1.16538
2219	0.33727	0.430143	0.068958	0.0392329	0.118299	0.199558
2222	0.822291	1.30292	0.975718	1.38221	0.882333	1.07399
2224	0.537499	1.01536	1.03083	0.884213	0.665621	0.961289
2230	-0.040944	-0.102112	-0.126052	-0.180784	-0.0921095	-0.107507
2232	3.65612	0.337377	0.339131	0.271458	0.246511	0.282051
2235	0.504575	-0.123396	-0.663668	-0.128497	-0.165174	-0.388405
2237	-0.197998	-0.105485	-0.19148	-0.343587	-0.345095	-0.235837
2239	-0.298633	-0.301212	-0.205099	0.689245	0.278055	0.033442
2241	-0.276135	-0.144112	-0.291001	0.305551	-0.109015	-0.166378
2242	-0.271485	2.56642	-0.378458	2.01139	-1.35138	0.61182
2243	-0.41535	-0.155883	0.125332	-0.138406	-0.721034	-0.272289
2244	-0.174156	-0.147776	-0.265523	-0.16186	-0.478852	-0.17796
2245	0.0467757	0.115228	0.260009	0.0904356	-0.14767	0.0737634
2246	1.20378	-0.832064	-0.191547	-0.550842	-0.440254	-0.16573
2247	0.453941	-1.2374	-1.46994	-7.18839	2.33197	2.2126
2252	-2.50074	-0.679776	-0.0139738	0.47121	-0.410396	-0.238052
2256	0.137714	-0.29203	-0.0957724	1.97688	-0.0072849	0.343214
2258	1.07966	0.618158	0.899651	0.671856	0.872464	0.829289
2259	0.996302	1.42329	1.43555	0.488605	1.46249	1.16213
2260	-1.52	0.944501	-3.44088	-2.50452	1.30626	0.462617
2261	3.22952	0.32764	0.537151	3.10762	-0.317053	1.24944
2262	-0.490651	0.798065	0	-0.677754	0	-0.0208188
2263	-1.25329	-5.99411	1.18646	-1.53411	-3.10543	-1.28436
2264	0.59503	0.708199	0.581544	0.410054	0.289488	0.355755
2266	-0.274601	-0.465452	-0.811846	-0.746391	-0.315067	-0.421627
2267	0.195122	0.269697	0.336865	0.269507	0.19249	0.253629
2268	2.97089	-1.44615	1.25551	-0.983284	-2.94096	-0.62665
2271	-1.90471	-1.68781	-3.21011	-1.56087	1.29236	-0.287951
2272	0.337153	0.351262	0.463516	0.356475	-0.778894	0.320583
2273	0.478168	-5.3281	0.464958	4.25149	4.52177	0.420673
2274	-0.537044	-0.732321	-0.674369	-0.789572	-0.879953	-0.440891
2275	-0.567803	-1.51122	-0.634526	-0.207323	0.792825	-0.430875
2280	-0.449821	-0.129804	-2.20483	-0.191088	-0.0979709	-0.470098
2281	-0.631473	-0.475728	-0.996347	-0.836774	-0.723728	-0.477722
2286	0.205404	0.182673	0.380429	0.245898	0.107846	0.197203
2287	0.100278	0.0857934	0.177622	-0.671502	0.106567	0.0880823
2288	-0.646882	-0.129312	-0.197389	-0.124465	-0.0186426	-0.0922855
2289	-0.217929	-0.357133	-0.159884	-0.126315	-0.30447	-0.232253
2294	-0.459504	0	0.890614	0.526406	-1.04787	-0.117354
2296	-0.483548	-0.544753	-0.13652	-0.345024	-0.445991	-0.390355
2300	0.190626	0.38699	-0.0188253	0.359871	0	-0.00978289
2303	0.0622048	-0.308743	0.438961	-0.840831	0.619193	-0.00382256
2305	-1.4291	-2.91756	-1.30105	-1.8438	-3.78388	-1.20555
2306	-0.0459269	0.409099	-0.151956	0.343066	-0.387587	0.0341578
2307	-2.19123	0.0918812	-0.902589	-0.625237	-2.48616	-1.22746
2308	-0.122953	-0.052659	-0.125854	-0.204762	-0.0278631	-0.105924
2309	0.292285	0.276701	0.568071	0.340499	0.290042	0.306032
2310	0.0524568	0.450523	0.170072	1.36998	0.352773	0.239727
2312	0.20592	0.596568	0.522043	0.918741	0.699929	0.589547
2313	-0.599642	-0.863603	-2.27461	0.848895	-1.71537	-0.713456
2314	2.89792	0.247727	1.63092	0.38535	0.204606	0.479266
2315	-1.7426	0	0.067507	0	0	0.47333
2316	-0.334334	-0.365381	0.950837	3.89755	-4.78669	2.38057
2317	-0.360663	-0.401793	-0.501045	-0.501305	-0.337836	-0.436682
2318	0.120512	-0.273032	-4.68863	-0.214581	-1.61492	-0.411246
2319	0.0603861	-3.35786	2.66481	0.488356	-0.0899996	-0.650263
2321	-0.682007	-5.13838	-2.12787	-2.1011	-3.57017	-2.75014
2323	-0.499237	2.74516	1.78821	0.646366	0.434062	0.397841
2324	-1.07641	0.312198	-0.201465	-1.97436	-1.59336	-1.14237
2326	-1.32894	3.83911	0.339009	-0.430622	0.136489	-0.41028
2328	0.377105	0.0427054	1.20256	0.935768	-0.127491	0.541492
2329	0.294521	0.243211	0.574978	-1.69629	0.146763	0.285174
2330	0.263432	0.489515	0.335232	0.273945	0.313445	0.336006
2331	-0.59123	-0.616517	0.484832	-1.6644	-0.406929	-0.256113
2332	-0.450103	-2.40281	-3.96869	-4.59815	-3.18078	-1.64242
2335	-0.8172	-1.03956	0.875616	1.03986	0.933698	-1.87349
2339	0.279369	0.180657	0.95702	0.161986	0.200468	0.184367
2342	-0.0870774	-0.118262	-0.529272	-0.0265019	-0.114585	-0.0658345
2346	-3.30776	-1.55601	1.67108	2.15615	1.74933	0.975455
2350	0.0250127	-0.566848	-0.679121	0	1.63151	-0.0388899
2353	-0.0458557	-0.0966023	0.183357	-0.136672	-0.00245462	-0.0187545
2354	-1.51859	-2.35552	-1.96613	-2.0504	-2.30932	-1.7205
2355	-0.214739	-0.314507	-0.370709	-0.225317	-0.28029	-0.28022
2356	0.530607	1.31171	-0.357844	2.85763	0.356695	-0.649411
2357	0.354897	-0.104916	-0.541296	-0.299231	-0.00619789	-0.118443
2359	0.0948165	0.0324269	0.0223112	0.141422	-0.302943	-0.00157668
2395	0.195387	0.232234	0.208121	0.591217	-2.88189	0.15797
2444	-0.13456	-0.111508	0.0890003	0.0219164	-0.112782	-0.0486946
2475	0.261081	0.0923317	2.41783	0.0665653	-0.086474	-0.0395835
2483	-0.260348	-0.129329	0.111275	-0.296135	0.0953558	-0.216256
2487	0.477966	0.544794	0.725828	0.285592	-0.0142238	0.402749
2491	-2.42217	-0.122818	2.19439	-1.51831	-0.970849	-0.612111
2494	-0.0788853	0.194782	0.456644	0.243096	-0.493036	-0.145664
2495	0.544439	0.257489	0.496145	0.474971	0.441441	0.362984
2512	0.365154	0.364602	0.354561	0.319361	0.294151	0.340459
2517	0.187719	0.168743	0.279274	0.145898	0.175568	0.192333
2519	0.20866	0.236538	0.295517	0.261807	0.201521	0.241702
2521	-0.172102	-0.135605	0.535635	-0.10255	-0.147053	-0.0853944
2523	1.26427	1.15536	1.22646	1.24123	1.72597	1.32376
2524	-0.424296	-0.949473	0.210838	1.75285	-1.02372	-0.0888019
2526	0.285516	0.396958	0.195142	0.429286	0.38589	0.339453
2528	0.769534	3.43991	2.90117	3.0996	4.24308	3.15194
2530	1.25705	-2.61473	-1.72068	2.62314	2.15681	-0.571863
2531	0.160659	-0.0834458	-0.439214	0.328497	1.38098	0.18376
2532	0.901546	0.932521	0	0.974636	0.756907	0.494137
2533	1.41571	0.898779	-1.27326	-2.27004	2.67543	1.73832
2534	2.28054	-1.79359	-2.88329	2.31349	0.964399	-0.938376
2535	-0.0577989	0.073678	-0.684659	0	0	-0.206721
2537	0.906989	-0.345322	0.374283	0.192916	-0.191818	0.231157
2538	0.488531	0.490872	0.562418	0.65483	2.61317	0.387459
2539	-0.55153	-0.201003	0.11738	0.45305	-1.2483	0.067009
2542	-0.187781	-0.144939	-0.29745	-2.76958	-0.371127	-0.13258
2547	-2.93465	-0.140499	-0.638257	-0.156079	-1.86106	-0.336281
2548	-0.183222	0.216628	0.289998	0.340067	-0.798688	0.952068
2549	-3.11979	-3.97005	0.119395	0.942728	-1.58961	-1.55535
2550	0.756388	1.54067	-0.105172	-0.0804842	-0.218398	0.194915
2551	0.218525	0.197421	-0.0658087	0.137609	0.216773	0.0786905
2553	-0.348537	-3.49084	-0.222893	-0.570721	-2.55634	-0.248547
2555	-0.0800233	0	0.701175	0.443092	0.986587	0.360989
2561	0.39461	-0.057819	0.462583	0.58293	0.28924	0.3279
2562	1.50268	-1.56112	1.04426	2.50524	1.14193	1.09849
2566	-0.300007	0.118761	1.69717	0.835664	1.03183	0.383478
2568	-0.986722	-1.42677	-0.63655	-0.528915	-0.780465	-0.661178
2570	0.14057	0	-0.0637556	-0.593436	0.551116	-0.382968
2571	1.95061	-1.08357	-0.0596001	0.143594	1.74181	0.545643
2580	-0.267236	-0.14808	-0.219602	-0.211278	-0.213352	-0.211017
2581	-0.0620198	-0.101714	-2.03407	-1.0695	0.609015	-0.0620768
2582	0.727885	2.1167	0.207161	-0.64649	0.806047	-0.324865
2583	1.91054	1.48496	0.454886	2.2069	0.647422	1.36027
2584	0.235801	0.38832	0.351808	0.29817	0.590049	0.28631
2585	0.579115	-3.43578	-1.32085	-1.26907	1.74001	-1.60668
2588	0.120412	0.25944	0.473918	0.367494	0.177186	0.280576
2589	-0.315749	0.198165	-0.828276	-0.187507	-0.143608	-0.217182
2590	-0.216703	-0.0960263	0.892059	-0.0722085	-0.31978	-0.148096
2591	-1.63558	-1.13989	2.22139	1.10067	1.30558	-1.12581
2592	0.372753	0.51788	0.764971	0.31228	0.534353	0.501337
2593	-0.0803438	0.244762	0.283829	0.264316	-0.177312	0.178104
2595	-0.568305	-2.31781	-2.69154	0.362549	-0.270262	-0.950422
2597	-0.386332	0.520846	-0.517997	-0.429502	-0.620526	-0.253568
2615	-2.68411	-1.28153	2.83414	-1.07282	-4.29544	-0.882908
2617	0.137015	-3.48485	7.01487	2.07387	-1.75102	-0.466951
2618	-0.292287	-0.273498	-0.425525	-0.381698	-0.240086	-0.337063
2619	0.459124	-0.104659	-0.151427	0.0629453	0.559953	0.16636
2620	0.542564	0.438437	0.372383	0.363468	0.508973	0.758427
2621	0.126857	0.440437	0.435933	0.16076	0.0209696	0.23788
2622	2.06565	0.593002	2.90615	3.43623	-0.173556	0.444746
2624	-1.50591	-1.6075	-0.0034372	0.902286	0.141484	-0.409943
2625	0.50002	0.329597	0.401722	0.374524	0.882088	0.498742
2626	-0.342256	-2.62768	3.52745	1.65923	0.174035	1.08833
2627	-0.0870782	-0.0828746	-0.131807	-0.126163	-0.192442	-0.123181
2628	0.254747	0.25552	0.192607	0.153068	0.342389	0.240559
2629	0.273589	0.303305	0.295624	0.271721	0.514909	0.211019
2630	0.280326	-0.655744	-0.754617	1.16577	-0.128567	-0.0167551
2631	0.2057	0.136837	0.160152	0.0883259	0.141333	0.147362
2632	-0.220926	-0.158966	-0.559125	-0.668761	0.169084	-0.237527
2633	-0.283386	-0.635731	-0.585093	-0.340773	-0.430152	-0.439635
2634	0.403339	0.283083	0.640903	0.283207	0.375576	0.389563
2635	-0.388101	-0.154347	-0.876498	-0.112224	-0.913886	-0.879222
2638	0.408483	-4.23267	0.176122	0.175639	0.274882	0.382161
2639	2.94361	-0.125525	-3.21879	-1.20862	-0.1735	-0.129995
2642	0.557546	0.413999	0.212967	0.359445	-1.05704	0.337568
2643	-0.26735	-0.339331	-0.340953	-0.321467	-0.554464	-0.363821
2644	0.348722	0.370575	0.537314	0.314653	0.213402	0.35782
2646	-1.68902	0.194715	-0.659117	-1.54305	-0.696228	-0.228116
2647	0.246705	0.222744	0.26567	0.177721	0.127444	0.208949
2648	-0.283279	-0.182696	-0.338625	-0.299629	-0.158671	-0.251686
2649	1.78789	0.0622629	1.39142	0.223466	-0.0786629	-0.230346
2650	1.11301	-1.93151	-0.325921	0.0579372	-2.4502	-1.17514
2651	0.244585	1.13334	-0.0715022	-1.43233	-1.87698	-1.18943
2653	-2.15924	0.554827	0.354765	-0.141502	-0.14714	-0.0660712
2658	-1.08123	0	-0.357569	-0.48266	-0.471302	-0.630351
2664	3.26087	0.498823	-2.41625	-2.79765	2.10929	0.81514
2665	-1.72631	-0.182769	-0.552847	-0.201872	-0.14195	-0.268125
2668	2.39998	3.93789	2.20594	1.83925	2.85399	2.07089
2669	0.513725	0.494348	1.68977	0.590289	3.25116	1.08042
2670	-0.23634	0.533319	-1.2616	-0.0864915	-0.592096	-0.0562649
2671	-0.240021	0.0888343	-0.565281	0.400548	0.921643	0.06652
2673	-0.211235	-0.0912994	0.208203	3.66419	-0.222334	-0.186487
2674	4.93511	-0.176141	-0.327277	1.19586	-3.93595	-0.342295
2675	1.36474	-0.252649	0.991018	-1.58475	0.50078	0.609586
2677	-0.307858	-0.457481	-0.220207	-0.918999	-0.501723	-0.271606
2678	0.584457	2.43977	0.580914	0.632686	0.27091	0.250438
2683	-0.236185	-0.34565	-0.310754	-0.210942	-0.329997	-0.285812
2686	0.1908	0.364748	0.406677	0.249874	0.146663	0.272638
2687	-1.6692	-1.58196	2.08254	1.25943	-1.53068	-0.63265
2690	0.271543	0.267145	-2.5385	0.292607	-0.764334	-1.3022
2697	-0.630242	-0.407655	-0.455652	-0.353301	-0.510083	-0.470548
2700	0.48544	1.04052	1.30296	0.432825	0.979403	0.849103
2701	0.101572	-0.18574	0.544318	1.12578	-0.503086	-0.0686669
2705	-3.23956	0.689684	0.626017	0.380069	-1.71815	0.391722
2706	0.157256	0.215475	0.284039	0.259536	0.0998077	0.204115
2707	0.169592	-0.187702	-0.500358	-1.90351	1.75262	-0.0784506
2710	2.57713	0.493918	0.494182	0.556521	-0.429304	0.269163
2717	0.188218	0.162193	-2.03018	2.24909	0.119544	0.109915
2720	0.163426	0.172054	0.177219	0.2028	0.159207	0.175834
2729	0.604578	0.50095	-0.376049	0.391718	0.507581	0.437599
2730	0.391677	0.169705	0.101371	0.245651	0.288596	0.210955
2731	-0.444145	-0.262201	-0.432482	-0.273822	-0.490831	-0.379803
2733	-0.71313	-0.301472	-3.40343	-0.638518	0.818111	-1.20801
2734	-0.480662	3.49121	0.299726	-1.43897	-2.14136	1.73384
2735	0.298429	-0.316867	0.39292	0.0204393	0.0386353	0.0873895
2736	-0.764816	0	0.130124	0.784071	-2.00508	-0.559077
2738	0.362791	1.83768	1.51604	-1.65636	-0.80735	-0.228733
2739	0.372162	0.228902	0.106129	0.303208	0.315354	0.266044
2743	-0.35164	-0.449287	-1.93102	-2.80059	-1.75392	-0.173814
2744	0.45808	0.577016	0.448516	0.450959	0.495361	0.486878
2745	-0.19043	-0.312151	1.07084	-0.140889	-0.26197	0.474078
2746	2.97938	3.86787	-0.131595	2.85869	-0.154653	-1.56353
2747	0.0888426	0.236026	0.0565442	0.0784991	0.236729	0.140231
2752	0.183678	-0.105633	-0.359374	-0.482049	0.115159	-0.30048
2760	0.300742	0.445298	0.382548	0.415723	0.369989	0.383753
2762	-0.440819	-2.14391	-0.434473	-0.253791	-0.393881	-0.314971
2764	0.24119	-0.136879	-0.238313	-0.130576	-0.0918172	-0.132238
2766	0.258131	-0.290323	0.0955264	-0.267287	-0.076847	0.54717
2767	-2.59303	-0.0926022	-2.23609	-1.51588	-0.0817978	-1.80292
2768	0.282776	0.26403	0.400665	0.278493	0.133246	0.221798
2769	0.140511	-0.813443	-0.0917848	-0.5084	0.236281	-0.20574
2770	-0.388895	-3.36382	-0.438242	-0.471973	-0.242827	-0.196771
2771	1.69078	1.37247	1.04086	1.05621	1.33508	1.30006
2773	-0.0517479	-0.182521	-0.184959	-0.146664	-0.074426	-0.12717
2774	0.815484	-1.61457	0.746865	0.903396	0.364062	0.621736
2775	-0.382465	-0.482224	-3.16961	-4.06244	-0.633968	-2.93896
2776	-0.230129	-0.245745	-0.158357	-0.122844	-0.262642	-0.203051
2778	0.169268	-0.345936	0.345072	0.239441	-3.84601	0.145387
2780	0.810094	-1.11241	-0.486627	-1.57555	0.0584794	-0.459918
2781	0.661222	0.962284	0.86685	1.37597	0.756326	0.925264
2782	0.366388	0.298468	0.253464	0.217147	0.495901	0.327168
2783	2.71815	-1.89681	0.629095	7.69236	0.797169	0.343089
2786	1.84529	-1.81148	1.16762	1.37869	1.33357	0.812302
2787	-0.0907757	-0.148106	0.961762	-0.0956975	-0.12868	0.168866
2788	-0.118664	-0.221747	0.467519	-0.0250472	-0.0311273	0.0150322
2790	-0.10634	-0.1554	-0.1432	-0.182636	-0.132079	-0.143038
2791	-0.576402	-0.562238	-0.087225	-0.490028	-0.0563381	-0.353539
2794	-3.8432	2.22706	-0.831711	2.32033	-0.201622	1.30462
2799	0.0632883	0.160668	0.230734	0.213215	0.0757809	0.14963
2800	-4.20744	-0.128746	-0.218674	-1.11535	-0.297503	-0.162898
2801	-0.747962	2.92461	-4.19922	-2.89278	-0.856443	-2.8387
2802	-3.71572	-3.92027	3.23045	-3.23536	-3.55888	-1.15075
2803	-0.292195	-2.13161	-2.30316	3.2595	-0.228744	-1.1554
2804	-2.22066	3.43046	3.73386	-2.64758	-2.56887	-0.825902
2805	0.23523	0.469795	0.331797	0.441516	0.219908	0.340542
2806	0.0524189	0.739944	-0.593334	0.0358748	-1.86571	-0.145373
2810	0.876175	1.22254	0.827832	1.18587	1.10798	1.04498
2811	-0.458207	-0.491684	-0.072891	-0.821602	-0.389639	-0.445886
2817	1.57929	0.141087	0.174745	0.196915	2.1714	0.132692
2819	-0.627877	-0.297667	-0.853853	-0.348511	-0.617596	-0.421023
2820	-0.440335	-0.334022	-0.400526	-0.470543	-4.65304	-0.370145
2821	-0.556931	-0.563868	0.227857	-0.531645	-0.4681	-0.433392
2822	-0.267755	-1.49961	0.143262	0.157319	-0.15444	-0.153131
2823	0.120486	-1.04217	1.6281	0.616931	2.02814	0.0425617
2824	-0.71407	-0.717003	-0.407864	-1.02076	-1.13752	-0.430816
2828	-1.2352	-0.368498	-0.228309	-0.512925	-0.61894	-0.592079
2831	-1.16653	-0.681035	-0.180976	-0.660029	-0.779983	-0.692828
2832	0.15016	0	0	0.376166	-0.752809	0.080827
2833	-0.291685	-0.164557	0.372915	-1.27001	0.427112	-0.183529
2837	0.15175	0.0877323	0.253447	0.470565	0.302955	0.254062
2846	0	0	0.634809	-0.265348	0.749476	0.352202
2847	-0.404451	0.223042	0.451698	-0.649292	-0.259258	-0.366861
2852	-0.470558	-0.294548	1.41199	1.41295	-0.753377	0.556295
2857	-1.58613	-1.81467	-0.164981	-0.466914	0.79189	-0.286649
2859	-0.17236	0.605384	-0.107872	1.61072	0.0140688	0.210593
2861	0.149596	0.0831489	-0.100903	0.140918	0.193945	0.0942357
2863	0.0579301	-0.0634328	-0.0776171	-0.0802168	0.0199823	-0.0277777
2868	-0.0200661	-0.420382	-0.28268	0.29013	-0.115706	-0.15843
2869	0.0713032	0.157984	0.0428068	0.180799	0.0660198	0.104674
2870	0.406587	-0.284702	-0.45718	-0.424092	0.422504	-0.156789
2872	0.215605	0.226473	0.275803	0.272035	0.129684	0.13718
2873	-0.482843	-2.42553	-1.01293	-0.389373	2.63793	-0.37269
2874	0.228871	0.171163	0.1737	-1.71446	0.281766	0.100696
2875	-0.350218	-1.8375	-3.95652	1.57627	-0.29446	-0.107781
2876	0.154671	0.171748	0.190945	-1.05789	0.882611	0.154488
2877	0.232536	0.343384	0.241073	-0.343887	-0.38825	0.0923008
2878	-0.490364	0.146581	0.220801	0.172611	-0.47743	0.112741
2879	0.409213	0.356147	0.477097	0.420591	0.386354	0.410773
2882	0.409946	0.474905	0.48144	0.519554	0.493389	0.476741
2885	2.53035	-0.180754	-0.387941	-0.140368	-0.927947	-0.434678
2886	2.97101	-1.25612	0.839637	-2.15954	-1.37312	0.582474
2887	0.326676	0.15307	5.30188	0.237555	-2.36236	0.130037
2888	-0.639313	-0.376518	-0.46523	-2.43775	-2.74251	-0.381362
2889	1.42426	-1.14328	-1.18063	0.971451	0.25088	-0.370918
2892	0.415112	0.719033	0.87615	0.587997	0.334494	0.387727
2894	0.78702	0.507577	0.894251	1.22091	0.484046	0.570813
2896	-0.292422	0.196816	0.429354	0.277492	0.100467	0.207981
2900	0.944298	1.84617	0.596539	0.918902	0	0.691934
2903	-0.396494	-0.355483	3.3e-05	-0.426913	0.00189665	-0.233753
2904	0	0.136295	0.127551	0.149899	-0.0431963	-0.0457039
2905	-1.19612	0	0.689509	0.845987	-0.632521	0.122381
2906	-0.392424	0.561685	0.712636	0.126962	0.202496	0.242262
2907	-0.293956	-0.15515	0.242434	-0.190066	-0.376495	-0.213149
2908	2.62695	-0.130216	-0.633382	-0.167175	0.386028	-0.103178
2909	0.0512001	0.0556463	0.0737696	0.0563259	0.0155357	0.0513884
2918	1.52428	3.22634	-0.619704	1.17416	-0.995373	1.50844
2919	0.0445527	-0.120979	0.0980722	-1.18267	1.59719	0.170849
2920	-0.26782	0.727876	0.206498	0.482613	-0.140894	0.686795
2921	-0.0839382	-0.327439	-0.260558	-0.335491	-0.141744	-0.228938
2923	0.346271	-0.402312	0.33059	0.588438	-0.233323	-0.36651
2925	0	-1.01171	0.101679	-0.928449	0	-0.254482
2926	-0.20337	-0.361689	-0.229287	-5.26754	-0.333681	-1.9324
2931	0.323903	-0.394665	0.117075	0.143632	-0.245629	-0.151881
2932	0.272365	0.305957	0.429837	0.148554	0.256093	0.231348
2934	0.410726	0.532821	0.492004	0.370603	0.397944	0.341785
2935	-0.108353	-0.165756	-0.247545	0.128546	-1.02428	-0.135777
2936	5.53445	-3.70496	-1.04202	2.24264	-1.18912	0.700272
2937	-2.80883	0.0687293	-2.68363	-0.341349	-3.33137	-2.23288
2938	0.357913	0.134628	-0.172581	0.691798	0.346054	0.512222
2939	0.00984489	0.0948691	0.124813	0.0103245	0.227925	0.094452
2941	1.67745	0.352074	0.216256	0.301926	0.268996	0.231782
2944	0.924501	-2.13743	0.419915	0.142156	-1.31423	0.154456
2946	-0.0279883	-1.70518	1.74277	0.402187	-0.551143	0.793807
2947	0.390628	0.358398	0.376188	0.40157	0.441231	0.380198
2948	0.174951	0.554881	0.424454	-0.0574366	0.555738	0.293371
2949	-0.56512	0.832555	-0.766364	-0.391047	-0.296467	-0.233741
2950	0.0710067	0.335705	0.51994	0.262379	1.1874	0.491351
2952	0.292084	0.227808	0.457777	0.185454	0.144953	0.274531
2954	0.212057	1.49005	0.707011	0.588	0.465742	0.516521
2956	-0.255544	-2.88508	-0.673007	-0.471955	-0.401831	-0.389821
2957	1.20623	0.717564	0.208776	0.513136	-2.38749	0.0801763
2958	0.982646	-0.39223	-0.178143	-0.270538	-0.171073	-0.140943
2959	-1.61856	-0.0916868	1.20544	0.0682764	0.0233889	-0.309715
2960	1.03394	-1.95174	-2.66159	-0.992665	1.00695	-0.708057
2961	0.653583	-0.105169	-0.114033	-0.152966	-0.183473	-0.0719755
2962	-0.332662	-0.174817	-0.727502	-0.163288	-0.132997	-0.351398
2963	-0.0882685	-0.137099	-0.168798	-0.138136	-0.254703	-0.103936
2965	-2.26398	-0.787746	-0.775934	-0.582003	0.215079	-0.442588
2966	-0.119648	-3.23672	-0.356334	-2.63021	-0.143621	-1.84438
2967	-4.06692	-0.204401	-0.330157	-0.260009	-0.264514	-0.231782
2968	1.79199	-1.74861	-1.78157	0.894829	1.80758	-0.129908
2969	-0.2304	0.217717	0.656412	0.244953	0.325046	0.313152
2970	-0.166408	0.183755	0.0353062	0.329075	0.158013	0.108843
2971	0.413749	1.31018	-0.743874	-0.110401	0.514801	0.568197
2972	-0.743708	-0.463122	-0.39953	-1.08637	-1.3112	-0.952965
2975	-0.758404	-0.319688	-0.219257	-0.408948	-0.345529	-0.342817
2976	-0.124946	-0.196563	5.29221	-0.127336	-0.141831	-0.175645
2977	-1.27553	-0.568586	0.278517	-0.660444	-1.29217	-0.704891
2979	-0.0417868	0.117044	-0.0223885	0.213509	-0.0195305	0.050265
2981	0.617328	0.0538378	0.532686	0.734585	0.50171	0.488781
2982	-2.46212	2.44785	-2.07321	-2.59554	2.16051	-1.27219
2983	-0.156725	0.645151	2.77252	2.0037	-0.298811	1.08638
2984	-0.0173717	0.252527	-0.216915	0.0894738	-0.0229101	0.0179354
2987	2.65685	1.61016	0.246503	-1.61543	-0.675527	0.180285
2990	1.34928	0.183545	0.227922	2.39795	1.12143	1.35415
2992	-1.8907	-0.160635	-0.276112	2.78293	-0.0935346	-0.123259
2995	-0.26648	-1.08825	0.209353	-2.34479	0.441458	-0.445225
2997	-0.409212	-0.157732	-0.18639	-0.0512125	-0.188655	-0.197746
2998	-0.398342	-0.267043	-0.116461	-0.445495	-0.558505	-0.356285
3000	0	0.228396	0	1.64248	0.879791	1.14113
3005	0.357769	0.14281	0.374024	0.23513	0.324488	0.287737
3006	0.127977	0.0804804	0.313335	0.322348	0.10351	0.190422
3008	0.232169	-0.595816	-0.143686	-0.570603	-0.0873483	-0.232201
3012	0.236975	0.796658	0.574346	0.607793	0.252508	0.494487
3013	0	0.447761	1.23165	-3.41317	0	-0.682751
3014	-0.311556	1.29437	0.098509	1.03131	-0.0802956	0.370015
3015	0.222322	0.169686	0.118935	-0.540797	-0.675897	-0.362819
3017	0.870176	0.628613	1.00345	0.831306	0.822486	0.832098
3020	0.102258	0.0898103	0.151144	-1.78037	0.0785177	1.27942
3021	0.266259	0.257126	2.7366	-0.108498	-0.0886394	-0.0638655
3026	-0.757181	0.129194	0.270975	0.138306	-1.01408	0.117592
3028	-0.581308	0.115539	-0.726324	-0.328033	-0.433141	-0.295031
3029	0.319496	0.820872	0.413998	0.182585	0.11801	0.188156
3030	0.389909	0.220809	0.212215	0.24784	0.184013	0.191734
3032	0.231214	0.061049	0.646388	-3.72875	1.21923	0.0713529
3033	0.399587	0.23051	0.259933	0.269058	0.316158	0.295942
3034	2.3556	0.195634	0.411505	0.624705	0.168791	0.186759
3035	-0.193823	-0.231751	-0.228299	-0.211996	-0.230707	-0.218422
3037	-0.970944	-0.595028	-0.415632	-0.763341	-0.969529	-0.742133
3038	0.910376	1.05287	-1.66962	-0.227857	-0.147507	0.323998
3039	0.028351	0	0.212303	-0.15801	-0.591272	-0.172763
3040	-0.154911	0.517743	-0.258026	0.3822	-0.255555	0.0491702
3043	-0.192937	-0.0745415	0.380466	0.095279	-0.110991	0.0202925
3048	0.314724	-0.204223	-0.0180183	0	-0.0412164	0.0639571
3052	-0.186629	-0.600644	-0.267047	0.341106	-0.0804021	-0.0787304
3053	-3.10932	0.321808	0.2034	0.27581	0.186611	0.226387
3054	-0.178487	-0.0827788	1.47903	0.702329	-0.180297	0.420595
3055	-1.63939	-1.15369	1.56505	1.92275	0.800763	1.12577
3059	-0.920251	1.06833	0.213143	0.248612	1.27175	0.421953
3064	-0.221746	-1.08823	1.20921	-0.877788	-0.149897	-1.04593
3065	0.261157	2.42172	0.860732	-0.120583	-1.65927	-0.0585504
3066	1.18496	-0.165608	-0.316609	-0.0921953	-1.65154	-0.840439
3067	0.182954	-3.13422	-0.611343	-1.83284	-0.898845	-0.654594
3068	-0.195719	-0.256132	-0.398743	0.318709	-0.19522	-0.219495
3069	-0.1421	-0.18161	-0.31311	-0.309266	-0.390249	-0.281595
3070	-0.496579	-0.481861	-0.700438	-0.935568	-0.682572	-0.658514
3071	1.1519	-0.311807	-2.82681	-1.57339	-1.41773	-0.526639
3073	2.22022	0.221981	0.429419	4.00222	-0.37993	0.2889
3074	0.210242	0.224028	0.272119	0.275308	0.252196	0.247671
3075	-0.47304	-0.138948	0.473747	-0.17734	-0.407329	-0.215361
3077	-2.4459	1.08284	0.369926	0.186428	-2.00658	0.153711
3078	-0.0247743	0.201574	0.184262	0.026635	-0.0429471	0.0698423
3080	-0.25816	0.286694	1.80892	0.390484	-0.390441	0.482441
3081	0.103688	0.205003	0.163414	0.0959844	0.0817403	0.130859
3082	-0.184404	0.460432	1.85799	0.823883	-0.363335	0.482959
3083	0.110291	0.311827	0.404743	0.353568	0.153635	0.267704
3084	1.02604	1.1726	1.07307	0.995626	0.932451	1.04085
3087	-0.388455	-0.394721	-0.13577	-0.327124	-0.413628	-0.331048
3090	-2.41612	-1.64134	-1.421	-1.58264	-3.08946	-1.82293
3091	-0.41723	-0.403987	-0.639319	-0.583536	-0.510012	-0.491501
3092	-0.163085	0.216213	-1.26669	0.0696361	-0.10316	-0.0350116
3093	0.392588	-0.325301	0.732372	-0.3028	-0.218868	-0.234514
3094	0.17677	-3.93555	0.310262	-0.3484	0.126435	0.156803
3096	-0.164721	-1.24413	1.16086	0.785974	-0.164113	0.243842
3097	0.613456	-0.513619	0.358243	1.86147	0.184002	0.154187
3098	-0.186237	0.178574	-1.92919	0.111926	-0.0235964	0.0152991
3099	0.921992	-2.4473	0.632156	-1.67794	-2.25731	-0.707186
3101	-0.895779	0.693451	-0.252444	0.852564	-0.175947	-0.0391667
3104	-0.367186	-0.333533	-2.69073	2.85343	-2.57002	-0.324697
3105	0.142959	0.12204	0.355095	-0.455524	0.414411	0.256224
3106	0.23148	-5.57167	0.464158	3.04442	0.152	1.90099
3107	0.17191	0.257183	0.452806	-7.92131	0.285704	0.987172
3108	-0.5892	1.84545	2.01645	-0.7192	-2.00555	-0.386085
3115	3.03667	0	-1.1293	-0.322637	-1.26473	0.108332
3117	2.83954	-0.221714	1.99074	0.302896	2.20746	0.831961
3122	-2.26309	1.92693	-2.59111	1.81116	-2.281	-0.928326
3123	0.267562	-0.119598	-0.534028	0.406428	1.99113	0.2051
3125	0.299485	-0.508964	0.706567	0.804345	0	0.243905
3131	0.887961	0.581105	0.395822	0.384786	2.287	0.164113
3133	0.409367	0.299646	0.316922	0.315103	0.320912	0.284927
3134	0.262629	-3.98718	0.336667	-2.21572	-0.344979	0.300151
3140	0.596197	-6.78422	0.436133	0.526993	0.463531	0.378562
3141	0.268691	0.599157	2.87213	1.6398	-0.102974	0.249417
3142	0.301221	0.160124	0.286543	0.399949	0.310861	0.292634
3145	-2.12442	-2.00441	2.22872	-2.55232	2.48143	1.42505
3146	-0.168577	-0.276024	-0.107822	-0.208937	-0.207262	-0.10216
3148	-1.36762	-0.909209	-1.42577	-1.02669	-0.374311	-0.59865
3149	-0.426177	0.244826	0.335251	0.218418	0.0942897	0.182111
3150	-3.26451	1.15216	-0.713362	2.19626	2.67547	-0.279232
3151	0.22738	0.214657	0.298124	0.132553	-1.60279	1.23753
3155	0.0664314	0.216701	0.252301	0.154211	0.143895	0.167601
3156	0.697833	0.887776	0.691494	1.04595	0.950474	0.627502
3157	0.592646	1.23512	0.815791	1.30432	0.732151	0.936898
3158	0.600224	0.151118	1.1335	0.565708	-1.40219	0.524014
3159	0.257555	0.143635	0.117182	-0.414351	0.154326	-0.382656
3161	-0.48377	-3.28453	-2.03092	-2.08677	-2.48889	-2.46049
3162	-1.92238	0.18537	0.131335	0.332432	-0.0602244	-0.688959
3163	-0.527656	-0.609595	-0.705748	-0.291819	-0.686274	-0.560284
3164	0.492711	-2.95152	1.56484	-0.284474	-1.27341	-0.761836
3169	-0.417434	-0.280999	-0.142605	-0.321551	-0.511345	-0.333897
3170	0.395819	0.501733	0.502538	0.73713	0.416872	0.464305
3171	0.0830848	0.226734	0.37369	0.284793	-0.0286018	0.188828
3172	0.323396	0.383542	1.14998	0.591463	0.28508	0.508764
3174	0.0923001	0.0781548	0.186699	0.0847765	0.569437	0.178565
3175	-0.161402	0.209539	0.538762	0.47044	-0.220106	0.696382
3176	0.176191	0.1655	0.164047	0.254632	0.11964	0.118487
3177	0.72279	1.21187	1.31976	1.3485	0.714085	1.06425
3178	0.193748	-0.314041	-0.224428	-0.348839	-0.133335	-0.178291
3181	-3.3746	-0.192966	0.888064	-0.273795	-0.140336	0.282789
3182	-3.9771	-0.110793	-0.17352	-0.262155	-0.121801	-0.135095
3183	-0.39677	-0.292712	-0.340207	-0.494438	0.246503	-0.311789
3184	-0.281337	-0.343869	-0.614641	-0.201552	-0.337059	-0.260944
3185	-0.181309	0.410219	-0.433433	-0.206468	-0.415014	-0.303595
3187	-0.788809	-0.765093	0.934408	-0.545281	-0.499029	-0.508306
3188	-0.0658716	-0.0464638	-0.00119266	-0.071552	-0.0970493	-0.055533
3189	0.127119	-0.11108	2.3326	-0.124736	-1.11255	-0.0729378
3190	0.88873	-0.176342	-0.128058	-0.278542	1.7258	1.13307
3191	0.4887	-0.144508	-1.64048	-2.16795	-2.64235	-1.3884
3192	-0.4385	-0.304558	-0.408695	-0.36115	-0.240337	-0.300057
3202	0.322938	-0.231821	0.0842304	0.45885	0.360023	0.19965
3206	0.894065	0.450521	-0.0224415	0	-1.2899	-0.116793
3212	-1.29317	-1.69186	-0.161675	-0.292574	-0.74415	-0.836825
3214	0.11898	0	0.476276	-0.116383	-0.531893	-0.0840759
3216	-2.42471	-0.321315	-0.134756	2.00505	-0.66173	0.347201
3240	-0.277541	0.434102	-0.53205	0.667629	-0.272629	0.234571
3241	-0.242847	-0.458164	-0.462649	-0.380584	-0.427879	-0.393532
3242	0.269578	0.0488695	0.158409	-0.167212	-0.137728	0.276279
3248	0.782554	0.939342	0.948275	0.903886	0.646499	0.68817
3249	-0.0603892	0.131224	0.313474	-2.86493	-2.28976	0.384156
3250	0.199218	0.354277	0.4069	0.270449	-0.491395	0.26159
3251	-0.221106	-0.140041	-0.184671	-0.122247	-0.200982	-0.172917
3257	0.744052	-0.21715	-0.578259	-0.400196	0.217836	0.135678
3263	-0.601047	0.227851	0.282882	0.207075	-0.858793	-0.822683
3265	1.95877	-1.73707	-2.84077	0.828812	0.987966	-1.03504
3267	-0.216031	-0.225614	-0.520902	-0.212113	-0.199052	-0.209221
3268	-0.30192	-0.434655	-0.449193	-0.582404	-0.480699	-0.308573
3273	0.115456	0.0894158	0.22613	0.0815636	0.593554	0.0971669
3274	0.965897	2.36525	0.617869	0.511328	0	0.860008
3275	3.25566	0.410384	0.36435	1.40024	0.359435	0.300405
3276	0.914997	1.84363	-0.261948	3.68795	1.46323	1.31776
3280	-0.433037	-0.217726	0.136913	-0.128864	-0.374117	-0.202478
3281	0.291849	-0.0977707	0.269916	-1.61978	1.57791	0.122938
3290	0.419963	0.230944	-1.74373	0.263124	0.316196	0.282333
3291	-0.169169	-0.16439	1.03268	0.0279636	0.794483	0.146699
3292	0.12961	0.137555	0.274083	0.209498	0.25404	0.180127
3294	-0.36276	-0.837024	-0.802077	-0.0997684	-0.360241	-0.152534
3295	0.108717	0.213089	0.145417	0.19949	-2.79555	0.846723
3297	-0.305269	0.0536031	0.117926	0.148476	0.179647	0.110792
3298	-0.931041	-0.453004	-0.295636	0.737801	-0.305305	-0.56548
3300	-1.22829	-0.147528	-0.127507	-0.255113	0.189846	-0.154582
3301	-0.0494219	-0.105607	-0.150797	0.785555	-0.047128	-0.0772994
3303	0.321375	0.40895	0.258799	0.536272	0.409798	0.3658
3304	0.444054	0.431489	0.816679	0.52996	1.18231	0.638515
3305	-1.96157	-1.15605	3.81876	2.7681	2.52043	-0.736855
3306	0.271814	0.183809	1.40359	1.17576	0.446229	0.541899
3308	-0.207581	-0.285117	-0.339006	-0.281629	-0.18251	-0.258275
3309	0.521584	0.434772	0.498655	0.379557	0.190333	0.351903
3310	0.114812	0.121813	-0.0800059	0.448749	0.150519	0.152071
3312	-1.97153	-1.10834	-0.361506	-0.197953	2.70529	-0.373072
3313	-0.918558	-0.252879	-0.428947	-0.24408	-0.205673	-0.659814
3315	1.21784	0.318015	0.420808	-6.66627	0.210118	0.329769
3320	-0.485448	-0.72768	-0.553917	0.910882	0.881938	0.257894
3321	0.779482	0.517709	0.751038	0.972018	0.807497	0.625625
3326	0.406476	-0.280525	0.7041	0.224316	-2.05245	-0.478754
3329	-0.203818	-0.288452	-0.309196	-0.308651	-0.26497	-0.274124
3336	0.355211	-0.169002	-0.420952	-0.238362	-0.272924	-0.182821
3337	-0.0992955	-0.386048	-0.553582	-0.296072	-0.199394	-0.305985
3338	-2.62519	0.263528	0.720138	-0.507125	0.354204	0.175902
3339	-0.413027	-1.53188	3.22494	1.45049	-0.194408	0.495965
3340	-0.243584	-0.0743881	-0.183173	-2.14508	-0.19811	-2.12083
3344	0.179309	0.0940926	0.0494528	0.0915696	0.225489	0.128876
3346	0.177316	0	0.0562511	-0.780226	-0.446289	-0.190478
3357	-0.410818	-0.562262	0.0155517	-0.425079	-1.30345	-0.537117
3359	0.0452085	1.0761	0.849814	1.03817	1.21175	0.845476
3364	-0.307299	1.74496	0.423828	-1.98452	-2.64157	0.172181
3371	-1.25583	-1.41116	-0.943201	-1.10686	-1.36048	-1.20605
3373	0.253058	0.507735	0.460289	0.551456	0.291561	0.326983
3376	-0.197304	-0.204527	-0.495022	-0.280244	-0.171586	-0.240821
3382	-2.05045	-2.29424	3.07971	-0.299635	1.15012	1.02939
3383	-0.542326	-0.536033	-0.450125	-0.43596	-0.600402	-0.512076
3384	0.521729	0.315845	-0.0339591	0.0870946	0.433047	0.265687
3385	-0.254402	-1.28894	-0.281559	-1.63474	-0.385272	-0.190678
3386	-0.498371	-0.773068	-0.568709	1.62665	1.53236	-0.461667
3394	0.64264	-0.161359	-3.19149	-0.30908	-2.95645	-0.822364
3396	0.529165	-0.031112	-0.0620838	0.424061	0.363653	0.243922
3397	-0.426072	-0.394137	-0.291591	-0.601218	-0.732351	-0.488184
3398	-0.0479213	1.05261	0.905438	-0.278281	-0.157078	-0.108715
3399	-0.28738	-0.115917	-0.28983	-0.336085	-0.198349	-0.244623
3400	-0.271107	-0.295288	-0.244094	-0.103979	-0.135249	-0.208848
3416	-4.41941	-3.86576	-4.67911	-2.50504	-0.547805	-1.28894
3417	0.37546	0.565475	0.540405	0.527499	0.379465	0.478554
3418	-0.137995	0.0970958	0.493345	0.102803	-0.214857	-0.546425
3419	-0.171715	0.232817	-0.436532	-0.237115	-0.185007	-0.172291
3420	0.151306	-0.202119	-0.210655	-2.14144	-2.41016	-1.26011
3421	-0.12345	-0.0885616	-1.68839	-0.0604958	-0.127892	-0.0636346
3422	0.474483	0.987588	0.631519	0.819584	0.442092	0.609632
3423	0.382732	0.427442	0.459217	0.428351	0.517679	0.443978
3425	-0.341774	2.30671	0.415619	1.57094	1.69618	1.42887
3426	-0.42694	-0.548168	0.490234	-0.481561	-0.427766	-0.428843
3428	-0.822343	-2.59232	1.08952	-0.25334	-1.86822	-0.746076
3429	1.24168	-0.682871	1.93091	-0.469037	1.12847	0.35888
3430	0.428858	0.585505	0.3099	1.32005	0.164647	0.861791
3431	-1.24424	-0.36256	0.464256	-0.242449	-0.554833	0.335187
3433	1.84137	-0.506119	2.08197	0.274277	3.78336	1.28887
3434	0.787274	-1.08179	-0.764139	-0.270986	-0.660287	-0.566147
3437	0.735912	-0.624575	-0.358983	-0.383927	2.10525	0.872709
3454	0.323403	0.276684	0.503351	4.45862	0.394909	0.38166
3455	-0.145391	-0.342783	0.173365	-0.244214	-0.200012	-0.159414
3459	-5.96238	-0.34635	-5.73817	-0.334004	-0.264881	-0.273098
3460	0.120372	0.145487	-3.77464	0.306646	0.618465	0.28431
3475	1.56646	-0.449653	0.978979	0.264919	0.962459	0.165601
3476	0.171911	0.0907857	0.131505	0.134458	0.216304	0.149886
3479	-0.299403	0.928767	0.150177	0.634555	-0.371451	0.485338
3480	-2.41248	2.41321	1.65675	0.405514	1.09175	0.91028
3481	-0.311647	0.175796	0.376998	0.197318	0.0375215	0.167668
3482	0.178911	0.250903	0.846722	0.342188	0.411667	0.383563
3483	0.199269	0.308711	0.271564	0.263764	0.250081	0.25957
3484	0.878527	0.664426	0.489159	0.831283	0.520808	0.677733
3485	0.267476	0.275664	0.329095	0.278122	0.255529	0.28207
3486	0.0691004	-0.151306	-0.439088	-0.348575	-0.0697654	-0.187033
3487	-0.319125	-0.0765348	-0.0612519	-0.212697	-0.377396	-0.208508
3488	-1.07661	-1.21531	-0.256748	-0.56051	-1.12407	-0.845879
3489	0.187639	-0.849841	0.488927	-1.07948	1.14568	0.166747
3490	-0.446879	-0.204117	0.283739	0.153881	-0.201557	-0.0820999
3491	-0.17806	-0.681078	-0.730471	-0.551017	-0.316627	-0.490558
3508	1.59835	-2.16787	-0.248187	-0.22786	-0.220689	-0.126266
3512	-1.96172	0.528065	1.76657	-0.0967222	-1.68386	-0.757331
3516	0.254894	-2.43432	2.31723	-3.62537	-2.28176	0.117637
3547	0.545429	0.558654	0.188112	0.312747	0.210582	0.363908
3549	0.234529	0.0347288	-0.134721	-0.000601807	-0.240973	-0.0205547
3550	-1.0876	-2.31915	1.00484	-3.48232	-2.62409	-2.00603
3551	1.64639	0.225014	-2.26426	2.40118	-2.24298	0.70226
3554	-0.177164	-0.490857	-0.696463	-0.662371	-0.228764	-0.147047
3556	-0.234534	-4.06881	1.6536	-5.23392	-0.424371	-0.236926
3557	0.168995	-0.963727	0.532503	0.235243	-1.97757	0.338077
3561	0.242796	0.119856	0.333554	0.54063	1.1152	0.0978383
3563	0.0244266	-0.259515	0.0523892	0.0526259	-0.295856	-0.0847113
3566	-0.795341	-2.63658	-0.38502	-0.836828	-0.439168	-0.608874
3568	0	0.213318	-0.766978	0	0.0334594	0.0863352
3569	-0.344075	-1.92868	0.958792	-1.7836	-1.76711	-0.74774
3570	0.455701	0.493297	0.459313	0.74439	0.387365	0.508906
3572	-0.157718	-0.517638	1.05178	0.917926	2.49412	-0.142614
3574	-0.586844	0.597182	-1.948	-0.196455	-1.85019	-0.396625
3575	-0.262303	-0.177604	-0.254639	-1.60493	-0.272178	-0.215113
3576	0.0426865	-0.237426	-0.321145	-0.159332	0.249492	0.26295
3587	-0.524928	-0.328165	-0.100421	-0.338865	0.660755	-0.124707
3588	0.346861	0.224915	0.170937	-1.51144	0.21604	0.212975
3589	-1.23742	-1.68005	-0.867048	-1.57541	-1.69967	-1.41171
3590	-1.72464	-0.0192037	-0.670538	2.36175	-1.0011	-0.210415
3592	0	0	0	0.262233	-1.28359	-0.125608
3597	0.245795	0.403273	0.270879	0.117093	0.40836	0.263391
3600	0.403347	-0.484947	-0.412873	-0.250571	0.404202	-0.205846
3601	-3.20436	0.544004	0.794633	0.631182	-0.441516	-0.911324
3603	0.499516	0.238767	-3.12996	0.10395	0.986233	0.498714
3604	0.551159	0.603174	0.428985	0.527219	1.04729	0.632506
3606	0.344004	-0.157866	-0.270931	-0.333952	0.105978	-0.147459
3607	0.153734	0.141697	-2.42797	0.321324	0.259699	0.170511
3608	-0.0794649	-0.140964	-0.207156	-0.171909	-0.132217	-0.145449
3609	-2.75528	-0.264209	2.0267	0.358879	-0.108994	-0.132668
3611	1.6101	-0.313452	-0.279064	-0.127702	0.21096	-0.237481
3612	-1.42813	-0.238962	-0.896438	-0.283628	-1.75187	-1.36817
3613	0.208659	0.239868	0.273709	0.397573	-1.01449	0.213142
3614	0.26618	0.708294	0.554057	0.57819	0.634734	0.549188
3615	0.0971066	0.210912	0.139617	1.29408	-0.823772	0.740707
3619	-0.463444	-0.22772	-0.263273	-0.386905	-0.394124	-0.291101
3621	0.225592	-0.483711	2.64286	0.0992497	0.141633	0.0883531
3622	0.0225843	0.317687	0.272367	0.125768	-0.126877	0.157705
3624	-0.465844	-0.844939	-0.867437	-1.10807	-0.239173	-0.704192
3625	0.520978	0.69794	1.03815	0.836813	0.604791	0.740624
3626	-0.165595	0.128525	0.176142	-0.0116573	-0.246687	-0.0229632
3627	-0.296525	-0.820582	-0.746884	-0.146354	-0.327054	-0.466576
3628	-2.3171	0.162265	0.315131	0.348215	0.221205	0.202908
3631	0.216491	2.2931	-0.577138	0.116717	0.215615	0.87549
3632	-0.136813	-0.136221	-0.152369	-0.182135	-1.22795	-0.134564
3633	0.398806	0.276798	0.470803	-3.04716	2.1323	0.375106
3635	0.319663	0.136595	-0.723854	0.0860235	-0.36779	-0.10907
3636	1.10286	0.219233	0.132957	0.17744	0.195201	0.161894
3638	0.524005	1.45083	1.03996	1.31187	0.708404	1.00791
3641	0.499831	0.384078	0	0	-0.978986	-0.214458
3643	0.311148	0.445204	1.13509	0.561088	0.242018	0.476486
3646	0.708866	-0.792346	0.803245	-0.234604	2.49411	-1.11352
3652	-0.180258	-0.185324	-0.511846	0.907669	-0.112842	-0.0528565
3654	3.98007	-0.6653	1.01907	-0.157511	-1.27944	-0.217336
3655	-0.175044	-2.13635	-0.194875	-0.37321	0.326781	-0.203146
3656	0.41395	0.440107	0.294481	0.443528	0.501882	0.419683
3658	-0.0979265	-0.191837	-0.19138	-0.193183	-0.16872	-0.167716
3659	-0.103471	-2.63646	-2.84771	3.44551	-0.37618	-0.776188
3660	0.142773	-1.22325	0.074583	-2.38994	-0.864025	0.0778224
3661	2.97786	1.67375	0.190729	0.20463	2.44974	1.21268
3662	0.812329	1.40148	1.50565	2.21127	1.18828	1.42464
3663	-0.300799	1.99279	-2.31857	-1.70843	1.01538	0.832088
3664	6.01807	0.683706	0.855549	0.64661	0.40747	0.580281
3665	0.553963	3.88584	0.338336	0.413615	6.33991	1.47373
3667	0.284927	-0.409265	-0.210076	0.171825	0.107277	0.0642806
3669	0.99412	0.435842	0.517007	0.165949	0.416891	0.949642
3672	-0.126138	-0.217277	2.00143	-2.12126	-0.177497	-0.238936
3673	-0.237223	-0.37015	-0.361128	-0.125173	-0.133242	-0.24449
3675	-0.769838	-0.422899	-0.584989	-0.660246	-0.608858	-0.608473
3676	-0.329936	-1.75563	0.414564	-0.21855	-3.36163	-0.537468
3678	-0.55679	-0.63011	-0.624599	-0.656761	-0.477113	-0.588182
3679	-0.429098	-0.253727	0.404882	-1.24708	-0.227583	-0.633081
3680	-0.115526	0.109127	0.178437	-0.580288	-0.698841	0.0211067
3682	0.283319	-0.40825	-0.447581	0.0815409	0.22194	-0.275012
3683	-5.04034	-2.46623	0.59928	2.98083	-1.27829	-0.738935
3684	0.481474	3.03812	1.94924	-1.31056	2.50208	0.4029
3685	0.594876	0.0939621	0.381122	0.671754	0.152409	0.315197
3687	-0.760717	0.11735	0.193456	2.30476	1.20251	0.296565
3688	-0.230377	-0.275451	-0.679746	-1.06012	-0.784172	-0.887978
3689	0.3703	-0.25375	0.426052	0.430187	0.276856	0.0169602
3690	-0.504402	-0.407429	-0.500094	-0.505202	-0.379588	-0.45845
3691	2.38332	2.08143	1.33485	3.93647	1.86108	1.20234
3692	-0.566991	-0.161778	-1.18458	-0.284651	-0.230212	-0.305466
3693	0.125318	0.1441	0.191767	2.44005	-2.67027	0.12553
3694	-0.159503	-1.30358	2.7977	-0.251304	2.69314	1.34811
3695	0.665515	0.133466	-1.74798	-1.52848	0.600344	0.325014
3696	-0.425001	-0.225062	-0.207879	-0.360504	-0.27911	-0.298503
3697	0.0957151	0.442482	0.470266	0.196744	0.163131	0.468147
3698	-0.383959	0.718319	0.0591134	-0.0548683	-0.268411	-1.4059
3699	-0.0944408	0.188119	0.280394	0.164488	-1.59431	0.828238
3700	-0.267335	0.167269	0.68498	0.454527	-0.183514	0.123134
3702	0.673589	0.137498	0.703726	-0.115653	1.14728	0.274383
3703	4.1844	-1.90521	0.323957	-0.189065	-0.294027	-0.138424
3704	-0.181166	-0.144855	2.50713	-0.164227	-0.143395	-0.132609
3705	-0.39984	-0.214098	-0.7953	-0.334511	-0.246711	-0.551289
3706	0.210677	0.685574	0.598486	2.00831	0.383183	0.403973
3707	-3.68994	2.3777	1.67877	-2.77106	2.17908	-1.37567
3708	-3.05852	-3.14847	-2.2845	-1.46689	-2.12313	-1.48672
3709	-0.221508	-0.146946	-0.180828	-0.298615	-0.211862	-0.228269
3710	-0.267915	-0.215504	-0.030538	-0.100135	-0.197178	-0.161363
3712	1.81242	2.82786	-1.99723	-0.845398	-2.35118	0.975695
3714	-1.23843	0.984625	1.26105	0.129338	-1.29958	0.257022
3716	-0.676272	-4.86781	0.535646	-0.560437	-0.28039	-0.245662
3717	-0.145055	-0.173479	-1.71567	-0.161053	-0.116029	-0.305023
3720	0.173012	0.0644513	0.147846	1.81394	-2.49789	0.0818737
3725	0.448348	0.236458	0.345412	0.44316	0.193389	0.248861
3726	0.0645392	-0.0667532	-0.0739247	-0.20121	-0.140713	-0.0827194
3727	0.50462	0.605705	0.699334	0.653956	0.545626	0.602741
3728	-0.268893	0.116151	0.234594	0.226675	0.159667	0.175461
3730	-0.0779241	0.0726309	-0.0210143	-0.585248	-0.637709	-0.250554
3732	-0.282382	-0.700058	0.288214	-0.227765	-0.229617	-0.144642
3735	-1.17023	-0.154403	-1.22515	-0.190487	-0.100269	-0.757564
3737	0	0	0.090649	-2.54623	0	0.815522
3739	0	-0.307085	-0.572593	0.029411	0.0475228	0.0775029
3745	-0.844453	0.165896	0.619363	0.609994	-0.298396	0.218451
3747	0	0.490008	0	0	-0.150312	0.244596
3748	0.562666	0.17418	2.80751	0.653785	0.683099	0.541836
3749	-0.84762	0.848115	1.44527	1.02747	1.26398	0.826928
3751	-0.41048	-0.21342	0.201912	0.273898	-0.217077	-0.072254
3752	0.372566	0.317583	0.484818	0.630011	0.214719	0.40483
3753	2.96801	-1.77401	-1.40744	1.26823	-1.08426	-1.08447
3755	-1.52821	0.135523	2.51651	-0.115533	-2.62634	-0.343252
3759	-0.630051	-0.397244	-0.222217	-0.0681939	-0.0721109	-0.276942
3760	-1.23829	-3.53081	1.13876	1.55243	-2.45893	1.0266
3762	-0.144811	-0.269169	0.00445976	-0.0587417	-0.484518	-0.189858
3763	-0.266069	0.442225	-0.0683639	-0.0549892	0.447696	0.101175
3764	0.433965	0.282952	0.072236	0.169287	0.337291	0.26004
3767	0.38125	0.27821	0.436351	0.737873	0.336027	0.434828
3770	-0.00100515	0.0713624	1.13527	1.1629	-1.96826	-0.326121
3772	1.24361	0.366776	-0.0559817	-0.919021	0.103597	0.35097
3775	0.182013	0.0272138	-0.0167984	0.215458	0.0997784	0.102425
3777	-0.0027769	-0.799874	-0.126559	-0.70315	-0.349711	-0.395598
3778	-2.01643	-3.02883	3.03836	-0.372519	-3.37809	-1.86124
3779	-1.14267	0.294455	0.265402	0.893621	0.182766	0.0995172
3781	-0.66232	0.297979	0.550289	0.873911	1.60256	0.547315
3782	-1.35138	0	0.0223412	0	-0.476941	-0.7857
3783	-1.26459	-0.770534	-1.43769	1.24276	-1.91228	-0.143515
3787	-0.388276	-2.15164	0.731481	0.310051	0	-0.290891
3790	0.64381	0.52447	0.252257	0.410603	0.715155	0.510175
3791	-5.5443	-0.74607	-0.589859	2.40631	-1.40798	-0.66808
3795	-0.240012	0.411847	0.410201	-0.382591	-0.444427	0.143579
3796	-0.681491	-0.689022	-0.532235	-3.43628	-0.740967	-0.613662
3797	0.49993	2.32178	0.439543	1.65537	0.872711	0.466821
3799	0.000677376	-0.0243943	-0.0772977	0.0260803	0.072726	0.000451519
3800	-0.825756	-0.647029	2.60739	-2.66636	-1.39609	-0.955964
3801	0.68544	0.236096	0.209333	0.302269	-1.88885	0.230576
3814	-0.0276353	-0.135673	0.0192479	0.0198315	-0.120135	-0.0480056
3815	-1.86049	0.531127	0.184402	2.02554	1.62939	0.258666
3818	-0.325248	-1.66073	0.312773	2.13682	-0.228394	-0.572696
3820	0.381489	0.587512	0.550176	0.936581	-0.895152	0.308026
3824	0.973021	-0.621677	-1.29374	0.639219	-0.716727	-0.516606
3827	-0.548053	0.177239	-0.237116	-0.310667	-0.496407	-0.354015
3831	-0.517994	-0.407557	-0.676629	-0.491253	-0.492236	-0.296952
3832	-0.529718	-0.266385	-0.585234	-1.76192	-0.620188	-0.751751
3833	-1.23082	-0.715042	-0.955509	-1.18514	-1.27782	-1.07199
3835	-0.342628	5.81411	0.629237	1.11734	-0.464244	-0.329814
3836	0.208344	-0.197305	0.159365	0.171509	0.264679	0.149556
3837	-0.487336	-0.370774	-0.9159	-0.164229	-0.241845	-0.264603
3838	-2.28341	2.38238	-0.169625	1.68656	-2.74782	-0.0798124
3839	0.0506477	-0.0743907	-0.137386	1.18556	0.0655606	0.226057
3840	0.213018	-0.222398	-0.984036	3.01795	-0.402919	-0.198471
3841	-0.279819	-0.527157	0.53027	1.83711	-0.905263	-0.223294
3842	0.177953	-0.307025	-0.411733	2.61979	0.201774	-0.148085
3843	-0.167425	-0.241017	-0.738613	-0.781655	-0.215013	-0.251767
3845	-0.376248	-0.459361	-0.455458	-0.369573	-0.399996	-0.411235
3855	-0.73589	-1.26217	-1.20322	-1.48775	-1.02789	-1.14249
3856	-0.340252	-0.647743	-0.718668	-0.415997	-0.432583	-0.39639
3858	0.113883	0.159798	0.158006	0.223613	-0.222816	0.137205
3872	0	-1.46938	0.0521061	-0.429032	0	0.044682
3875	-0.429925	-0.422464	-0.406962	-0.464759	-0.498995	-0.443728
3880	-0.300819	-0.182717	-0.158489	-0.39117	-0.375126	-0.280773
3887	0.331002	0.00990622	-0.171287	-0.482209	0.112417	-0.0391395
3892	-0.751377	-1.23034	-1.75044	2.6154	0.827857	-0.943752
3895	-0.19494	-0.194227	0.0969902	-0.160819	-0.13204	-0.717551
3898	-0.129012	-0.0474087	0.115888	-2.58923	1.53367	-0.325563
3899	-2.76485	-1.90196	0.585814	-1.01913	0.279024	0.260186
3902	0	-0.395187	0	-0.827416	0	-0.266478
3903	-0.521099	0	-0.269603	-1.68631	-1.96989	-1.50294
3908	-2.24592	-0.501763	-1.00885	2.00244	0.581211	-1.28899
3909	0.266229	3.60574	1.37491	0.532612	-5.09566	0.322519
3910	-2.23001	-3.00963	-2.03348	-1.66715	-3.47178	-0.822471
3911	-0.59123	1.34094	0.737155	2.45989	0.583688	1.22766
3912	-0.194661	0.375472	0.893919	0.268785	4.31634	1.29239
3913	-0.111802	0.0998553	3.74099	0.21455	1.14279	1.78008
3914	0.141041	0.177077	0.320696	-0.134365	0.485649	0.195911
3915	0.2016	0.345202	0.506982	2.02173	0.294374	0.258634
3916	0.0792837	0.0945939	0.280556	0.163693	0.0758706	0.139693
3918	0.0481413	0.108219	-0.504896	-0.265939	0.312116	-0.213771
3920	0.300849	0.180462	0.348637	0.313312	0.265532	0.242945
3921	0.0789126	-0.535381	-0.777798	-0.155213	-0.463005	-0.463052
3925	-3.07944	0.397374	0.303662	-0.0958753	-0.392995	0.12919
3927	-0.478574	-1.75117	-0.370679	-1.63662	-2.28898	-0.230507
3929	-0.25006	-0.0711585	-0.0390332	-0.0336351	-0.387713	-0.155427
3930	0.0794054	0.534239	-0.277091	0.105075	1.23295	0.265636
3931	0.142919	0.882945	0.306012	2.09283	0.880732	0.330734
3934	-0.5127	-0.695041	-1.22282	-0.0974396	-0.392255	-0.328312
3936	0.207487	0.165274	-0.250343	2.54479	0.190927	1.07207
3937	-1.02354	0.115255	-2.15397	-0.466638	-0.309601	-0.846811
3939	-0.208928	-0.395155	-0.716008	-0.63087	-0.39669	-0.401985
3945	-0.750489	0.126993	0.868798	-1.96962	-0.102715	-0.651115
3948	0	0.393268	1.28518	0.470145	0.815509	0.376964
3949	0.364749	0.626507	0.488235	0.712793	0.512878	0.541926
3950	-0.195571	-0.257257	0.316332	-0.156602	-0.189665	0.60457
3953	-0.302936	-0.1808	-0.4037	-0.389743	-0.164494	-0.28744
3954	-0.216886	-0.169458	-0.145858	-2.46232	-0.213992	-0.165124
3955	-0.273273	0.980993	0.104001	2.11691	-2.91255	0.426469
3956	0.240542	0.291528	0.354371	0.351552	0.331563	0.314804
3957	-0.302625	-0.0315821	0.0592193	0.352192	-0.205394	-0.0247943
3958	0.525531	0.222848	0.34792	0.342552	0.259777	0.340613
3959	0.281633	-1.68707	0.395644	-1.19144	1.00282	0.492756
3960	-0.0635237	0.0896336	0.140874	0.0689056	0.831809	0.0383372
3964	0.27525	2.49665	0.432252	0.183243	0.177022	0.230447
3965	-1.97765	-0.519956	1.49155	-0.174595	2.66727	0.440097
3976	-0.0215767	-0.164327	-0.0839881	-0.299843	0.199428	-0.0731562
3977	0.178606	0.631405	0.259726	0.409393	3.26979	0.548274
3978	-0.604146	-0.585823	-0.360994	-0.582143	-0.550327	-0.535794
3980	-0.523424	-2.44727	0.971242	2.10994	2.09787	-0.195016
3981	3.27346	-2.45888	-4.11648	0.222589	3.98869	-1.11206
3983	-0.323684	-0.231181	-0.636001	0.393502	-0.179214	-0.3086
3984	-1.82125	-1.1282	-0.047453	-0.0544695	-0.0258557	-0.0513556
3985	-0.227313	0.430089	-3.7126	2.91696	-0.258088	-0.750996
3987	-0.172288	-0.401355	-0.417819	-0.42222	-0.253301	-0.332503
3988	0.200976	0.204235	0.888568	0.271918	0.130888	0.185031
3990	0.702295	0.278293	0.549947	0.563197	0.26622	0.603329
3991	0.569732	0	0.358328	1.18717	-0.597446	0.465591
3992	0.741199	0.998714	0.593291	0.972381	0.661271	0.794264
3993	-0.88656	0.139349	1.67605	2.17778	-0.783895	-0.19179
3995	-0.180651	-0.207688	-0.27308	-0.274851	-0.175608	-0.221482
3996	-0.223372	-0.0532442	-0.266953	-0.144927	-0.116924	-0.160187
3998	1.8764	-0.104657	-0.0959762	-0.127867	-0.209003	-0.128808
4000	-0.442463	-0.165453	-0.184266	-0.149696	-0.148	-0.153073
4001	-0.571571	-0.697925	-0.526049	-0.565914	-0.964507	-0.664321
4005	-1.27098	1.50779	1.31976	0.841632	-3.50703	-1.71283
4007	0.338036	0.272726	0.320579	0.405683	0.27177	0.322647
4008	-0.312084	-0.763072	-0.4977	3.99169	-5.40679	-2.06962
4010	-0.786225	-0.116727	-0.821029	-0.29645	-0.242962	-0.448905
4012	0.20269	-0.200929	0.0674423	0.0935314	-0.114172	0.130982
4013	0.390953	0.566163	0.392858	0.409129	0.338925	0.420493
4015	-0.640648	-0.551265	-0.464295	-4.59634	-0.891855	-0.492983
4016	-0.348741	0.246575	-0.0129948	-0.161638	-0.110836	-0.0765236
4017	-0.489653	-0.536345	1.32646	-0.0540349	-0.370416	-0.296791
4018	-0.595958	0.180164	0.518665	0.489328	-0.421669	-0.0969113
4023	0.29211	0.403523	0.312572	0.360851	-1.09043	-0.0496009
4026	-0.603692	-0.545461	0.515593	0.575971	-1.20247	-0.682831
4034	-0.445932	-0.297066	0.520769	-3.28373	-3.01983	-1.46185
4035	-0.413665	0.523874	2.39598	3.37286	-0.280921	1.15312
4036	0.246662	0.160449	0.242614	0.121999	0.00739218	0.156669
4037	-1.2098	-1.06499	-3.35431	0.695451	0.0102686	-0.702994
4038	-1.57641	0.50813	3.08236	-0.700452	0.4458	0.0587417
4040	-0.270358	-0.321663	-4.14884	-0.195041	-0.319988	-0.191961
4041	-0.146844	1.58016	-0.0435116	0.946549	-0.144923	-0.0779546
4043	0.0805116	0.218609	0.370074	0.132137	0.0777474	0.117739
4046	1.07497	0	-2.353	0.412496	-1.28439	-0.607299
4047	0.663238	1.21835	0.881118	1.33736	0.648977	0.950702
[truncated: 13,327 more rows]

## Sheet: Table S2
Common 816 genes fold-change values across five lot and merged
Gene	A	B	C	D	E	Merge
1	0.265905	0.367922	0.412374	0.294682	0.544354	0.296418
12	-0.450403	-0.74792	-0.741212	-0.682835	-0.699457	-0.702731
16	0.352955	0.311186	0.225781	0.277948	0.196079	0.273683
21	0.566996	0.60016	0.437515	0.537334	0.389838	0.507258
39	0.837758	1.44534	0.946906	1.39218	0.747761	1.07488
51	0.319691	0.182852	-5.45201	0.471582	0.351426	0.161275
87	-0.331624	-0.458952	-0.548827	-1.28085	-0.379046	-0.718232
102	-0.192023	-0.245126	-0.293321	-0.230665	-4.20462	-0.189921
123	0.348413	0.319441	0.296256	0.356171	0.421153	0.34918
142	-0.206081	-0.268699	-0.310954	-0.270376	-0.300825	-0.270494
147	0.657941	0.795908	0.813413	0.90541	0.843234	0.804078
197	0.186717	0.342487	0.255566	0.276784	0.28298	0.2698
205	-0.272613	-0.436278	-0.250136	-0.370522	-0.242064	-0.31343
211	-0.884912	-0.464609	-0.595399	-0.718	-0.657829	-0.570483
216	-0.563697	-0.440342	-0.460036	-0.550122	-0.55918	-0.513782
217	0.923217	0.457146	0.412158	0.317095	0.187815	0.229464
226	-0.232068	-0.240747	4.79881	-0.239149	-0.25271	-0.228766
301	-0.521837	-0.404216	-0.640885	-0.439825	-0.364345	-0.473327
307	-0.24373	-0.200532	-0.484358	-0.323732	-0.310143	-0.230484
311	-0.194347	-0.193549	-0.388973	-0.364661	-0.262562	-0.27089
332	-0.764107	-0.837748	-0.579056	-0.80136	-1.21361	-0.838317
387	-0.346923	-0.350198	-0.591357	-0.7595	-0.400173	-0.488736
388	0.401188	0.361161	0.28565	0.486532	0.343907	0.376581
408	0.432264	0.358903	0.510817	0.604181	0.594664	0.501061
412	-0.479586	-0.728544	-0.646865	-0.783178	-0.835434	-0.632401
415	0.531565	0.622443	0.622229	0.60147	0.418372	0.560106
421	0.319527	0.559756	0.513055	0.62381	0.387084	0.481537
435	-0.252313	-0.314474	-0.444197	-0.295343	-0.434529	-0.378356
444	-0.435689	-0.292466	-0.611229	-0.521027	-0.481273	-0.386872
462	0.294076	0.279049	0.274621	0.280168	0.242038	0.274883
467	0.648558	0.438489	0.303305	0.431403	0.629635	0.491173
468	0.502484	0.472277	0.328849	0.447078	0.440958	0.439222
488	-0.443304	-0.306176	-0.224859	-0.596174	-0.582049	-0.42962
563	0.253352	0.211658	0.330491	0.210131	0.16496	0.235011
570	0.354867	0.358241	0.868254	0.828074	1.02672	0.825418
571	0.519842	0.304272	0.227295	0.515747	0.509374	0.4162
595	-0.262155	-0.466812	-0.453588	-0.667949	-0.278766	-0.424961
635	-0.521711	-0.929379	-0.627321	-0.336875	-0.890507	-0.660269
642	-0.233051	-0.324815	-0.302315	-0.369904	-0.366177	-0.318361
650	0.326495	0.370886	0.265858	0.304729	0.470147	0.348516
656	0.483113	0.54538	0.379608	0.505666	0.588002	0.501253
705	4.59805	-0.20736	-0.266897	-0.227677	-0.214037	-0.208681
771	0.288648	0.459621	0.673445	0.695444	0.380554	0.500434
800	-0.248873	-0.556267	1.76567	-0.48205	-0.400535	0.774299
847	0.291029	0.355457	0.274426	0.292897	0.331759	0.310007
890	-0.842418	-0.533055	-0.744491	-0.824421	-1.06744	-0.801482
891	-0.453479	-0.533845	-0.487865	-0.605605	-0.670806	-0.550701
901	1.09408	0.941103	1.52363	1.04646	1.15928	1.1538
908	-0.150687	-0.214851	-0.317169	5.94622	-0.171441	-0.211554
983	-1.08638	-0.816668	-0.809919	-1.26788	-1.15832	-1.02697
991	-0.938731	-0.64108	-0.77715	-0.809022	-0.741815	-0.780666
1019	0.309657	0.32983	0.269336	0.30419	0.248326	0.293161
1027	0.200829	0.164862	0.232782	0.198996	0.193167	0.19902
1050	0.434729	1.02918	0.729918	0.717045	0.553921	0.693851
1054	0.829107	0.619601	0.572127	0.754463	1.12124	0.645994
1109	0.319328	0.436761	0.335746	0.347266	0.211082	0.330927
1122	-0.525557	-0.662552	-0.805909	-0.509397	-0.419265	-0.583642
1244	0.235759	0.372725	0.245544	0.32297	0.3049	0.297273
1265	-0.318986	-0.539652	-0.277125	-0.524429	-0.347428	-0.400631
1312	0.465578	0.491766	0.374199	0.274056	0.286694	0.364555
1364	0.583481	0.525043	0.345495	0.472595	0.645761	0.515369
1365	0.375444	0.577692	0.65306	0.667518	0.513987	0.55843
1366	1.20595	1.03986	1.23382	1.14969	1.29657	1.18609
1373	-0.553551	-0.284361	5.04026	-0.326086	-0.742172	-2.79822
1407	-0.288017	-0.456418	-0.60914	-0.329018	-0.312352	-0.398096
1429	0.519269	0.618701	0.501402	0.566516	0.623563	0.566783
1434	-0.150173	-0.207864	-0.34644	-0.212658	-0.189062	-0.220346
1465	-0.144774	-0.296742	-0.326876	-0.271333	-0.154284	-0.237909
1508	-0.4921	0.567485	0.44062	0.965195	-0.912266	0.829395
1514	0.378085	0.531637	0.336484	0.314906	0.353314	0.383778
1571	0.310619	0.228871	0.283553	0.240876	0.218444	0.257365
1573	0.424115	0.251245	0.433411	0.242854	0.346204	0.340459
1577	1.04579	0.870635	0.871982	0.905071	0.900532	1.13556
1592	-2.19614	-7.2189	-2.66459	-3.32882	-3.3655	-3.97049
1595	0.77639	1.12164	0.899686	1.17871	0.765547	0.949287
1616	0.966836	0.534231	0.44342	0.624913	0.683111	0.434857
1645	0.567542	0.451344	0.428782	0.338604	0.376044	0.941641
1646	0.351481	0.700911	0.87892	0.552552	0.644646	0.461352
1649	0.966749	0.617438	0.739116	0.949913	0.776046	0.689478
1653	-0.182094	-0.202206	-0.299091	-0.224071	-0.178673	-0.216334
1717	0.762385	1.1607	0.906509	1.22025	0.651523	0.941166
1736	-0.299736	-0.310473	-0.389582	-0.228782	-0.330043	-0.31083
1785	-0.319933	-0.263484	-0.504287	-0.410307	-0.503743	-0.316747
1856	0.479699	0.75185	0.492088	0.542405	0.632212	0.580547
1869	-0.50637	-0.548443	-0.872289	-1.05435	-1.00257	-0.795937
1890	-0.410596	-0.298631	0.769021	-0.341432	-0.343412	-0.297231
1891	0.56671	0.595447	0.649088	0.640585	0.515757	0.59441
1965	-0.207735	-0.313433	-0.427734	-0.33032	-0.213256	-0.277082
1983	0.165898	0.237954	-0.936675	0.496221	0.187289	0.287072
1992	-0.163077	-0.188922	-0.206929	-0.345441	-0.271162	-0.234213
1997	0.241962	0.15994	0.2817	0.193858	0.279222	0.232229
1999	0.744499	0.753559	0.611653	0.479883	0.24786	0.715187
2012	-0.658358	-0.6493	-0.439889	-0.516184	-0.496735	-0.551203
2014	0.517703	0.460533	0.543681	0.352374	0.442563	0.464264
2037	-0.373296	-0.425217	-4.47605	-0.488783	-0.372142	-0.383146
2064	0.317724	0.268696	-1.16017	0.686214	0.323791	0.334306
2065	0.278668	0.533364	1.02243	0.809005	0.44048	0.617678
2159	0.370196	0.376681	0.551679	0.328121	0.380925	0.402411
2165	-0.545956	-0.384763	-0.306883	-0.54295	-0.550045	-0.465228
2166	0.379994	0.445641	0.402309	0.491963	0.376957	0.420263
2180	0.282478	0.821101	1.0372	0.450277	0.651211	0.866904
2193	-0.228628	-0.234595	-0.331049	-0.225968	-0.298128	-0.262781
2217	0.201021	0.360438	0.418358	0.302718	0.184407	0.29428
2222	0.822291	1.30292	0.975718	1.38221	0.882333	1.07399
2224	0.537499	1.01536	1.03083	0.884213	0.665621	0.961289
2317	-0.360663	-0.401793	-0.501045	-0.501305	-0.337836	-0.436682
2335	-0.8172	-1.03956	0.875616	1.03986	0.933698	-1.87349
2355	-0.214739	-0.314507	-0.370709	-0.225317	-0.28029	-0.28022
2519	0.20866	0.236538	0.295517	0.261807	0.201521	0.241702
2523	1.26427	1.15536	1.22646	1.24123	1.72597	1.32376
2618	-0.292287	-0.273498	-0.425525	-0.381698	-0.240086	-0.337063
2633	-0.283386	-0.635731	-0.585093	-0.340773	-0.430152	-0.439635
2634	0.403339	0.283083	0.640903	0.283207	0.375576	0.389563
2683	-0.236185	-0.34565	-0.310754	-0.210942	-0.329997	-0.285812
2729	0.604578	0.50095	-0.376049	0.391718	0.507581	0.437599
2731	-0.444145	-0.262201	-0.432482	-0.273822	-0.490831	-0.379803
2760	0.300742	0.445298	0.382548	0.415723	0.369989	0.383753
2775	-0.382465	-0.482224	-3.16961	-4.06244	-0.633968	-2.93896
2810	0.876175	1.22254	0.827832	1.18587	1.10798	1.04498
2819	-0.627877	-0.297667	-0.853853	-0.348511	-0.617596	-0.421023
2879	0.409213	0.356147	0.477097	0.420591	0.386354	0.410773
2934	0.410726	0.532821	0.492004	0.370603	0.397944	0.341785
2947	0.390628	0.358398	0.376188	0.40157	0.441231	0.380198
3005	0.357769	0.14281	0.374024	0.23513	0.324488	0.287737
3017	0.870176	0.628613	1.00345	0.831306	0.822486	0.832098
3033	0.399587	0.23051	0.259933	0.269058	0.316158	0.295942
3035	-0.193823	-0.231751	-0.228299	-0.211996	-0.230707	-0.218422
3074	0.210242	0.224028	0.272119	0.275308	0.252196	0.247671
3084	1.02604	1.1726	1.07307	0.995626	0.932451	1.04085
3091	-0.41723	-0.403987	-0.639319	-0.583536	-0.510012	-0.491501
3093	0.392588	-0.325301	0.732372	-0.3028	-0.218868	-0.234514
3133	0.409367	0.299646	0.316922	0.315103	0.320912	0.284927
3156	0.697833	0.887776	0.691494	1.04595	0.950474	0.627502
3157	0.592646	1.23512	0.815791	1.30432	0.732151	0.936898
3163	-0.527656	-0.609595	-0.705748	-0.291819	-0.686274	-0.560284
3183	-0.39677	-0.292712	-0.340207	-0.494438	0.246503	-0.311789
3184	-0.281337	-0.343869	-0.614641	-0.201552	-0.337059	-0.260944
3187	-0.788809	-0.765093	0.934408	-0.545281	-0.499029	-0.508306
3192	-0.4385	-0.304558	-0.408695	-0.36115	-0.240337	-0.300057
3241	-0.242847	-0.458164	-0.462649	-0.380584	-0.427879	-0.393532
3248	0.782554	0.939342	0.948275	0.903886	0.646499	0.68817
3303	0.321375	0.40895	0.258799	0.536272	0.409798	0.3658
3304	0.444054	0.431489	0.816679	0.52996	1.18231	0.638515
3308	-0.207581	-0.285117	-0.339006	-0.281629	-0.18251	-0.258275
3313	-0.918558	-0.252879	-0.428947	-0.24408	-0.205673	-0.659814
3329	-0.203818	-0.288452	-0.309196	-0.308651	-0.26497	-0.274124
3371	-1.25583	-1.41116	-0.943201	-1.10686	-1.36048	-1.20605
3373	0.253058	0.507735	0.460289	0.551456	0.291561	0.326983
3383	-0.542326	-0.536033	-0.450125	-0.43596	-0.600402	-0.512076
3417	0.37546	0.565475	0.540405	0.527499	0.379465	0.478554
3422	0.474483	0.987588	0.631519	0.819584	0.442092	0.609632
3423	0.382732	0.427442	0.459217	0.428351	0.517679	0.443978
3459	-5.96238	-0.34635	-5.73817	-0.334004	-0.264881	-0.273098
3483	0.199269	0.308711	0.271564	0.263764	0.250081	0.25957
3484	0.878527	0.664426	0.489159	0.831283	0.520808	0.677733
3485	0.267476	0.275664	0.329095	0.278122	0.255529	0.28207
3491	-0.17806	-0.681078	-0.730471	-0.551017	-0.316627	-0.490558
3570	0.455701	0.493297	0.459313	0.74439	0.387365	0.508906
3625	0.520978	0.69794	1.03815	0.836813	0.604791	0.740624
3638	0.524005	1.45083	1.03996	1.31187	0.708404	1.00791
3656	0.41395	0.440107	0.294481	0.443528	0.501882	0.419683
3675	-0.769838	-0.422899	-0.584989	-0.660246	-0.608858	-0.608473
3678	-0.55679	-0.63011	-0.624599	-0.656761	-0.477113	-0.588182
3688	-0.230377	-0.275451	-0.679746	-1.06012	-0.784172	-0.887978
3690	-0.504402	-0.407429	-0.500094	-0.505202	-0.379588	-0.45845
3725	0.448348	0.236458	0.345412	0.44316	0.193389	0.248861
3727	0.50462	0.605705	0.699334	0.653956	0.545626	0.602741
3752	0.372566	0.317583	0.484818	0.630011	0.214719	0.40483
3843	-0.167425	-0.241017	-0.738613	-0.781655	-0.215013	-0.251767
3855	-0.73589	-1.26217	-1.20322	-1.48775	-1.02789	-1.14249
3856	-0.340252	-0.647743	-0.718668	-0.415997	-0.432583	-0.39639
3875	-0.429925	-0.422464	-0.406962	-0.464759	-0.498995	-0.443728
3939	-0.208928	-0.395155	-0.716008	-0.63087	-0.39669	-0.401985
3949	0.364749	0.626507	0.488235	0.712793	0.512878	0.541926
3956	0.240542	0.291528	0.354371	0.351552	0.331563	0.314804
3987	-0.172288	-0.401355	-0.417819	-0.42222	-0.253301	-0.332503
3990	0.702295	0.278293	0.549947	0.563197	0.26622	0.603329
3992	0.741199	0.998714	0.593291	0.972381	0.661271	0.794264
3995	-0.180651	-0.207688	-0.27308	-0.274851	-0.175608	-0.221482
4001	-0.571571	-0.697925	-0.526049	-0.565914	-0.964507	-0.664321
4047	0.663238	1.21835	0.881118	1.33736	0.648977	0.950702
4051	0.552899	0.551521	0.947128	0.571433	0.468235	0.619134
4076	-0.281211	-0.312417	-0.60635	-0.224414	-0.214468	-0.310473
4077	0.414101	0.151498	0.184059	0.235929	0.258907	0.249792
4097	0.277375	0.327174	0.295694	0.404995	0.359071	0.333756
4143	0.268457	0.370378	0.323029	0.362259	0.151207	0.295959
4144	0.73647	1.02082	0.491045	0.595557	0.658071	0.701285
4163	-0.535587	-0.601846	-0.322953	-0.401937	-0.515497	-0.474672
4171	-0.544214	-0.700085	-0.952274	-0.972574	-0.819991	-0.796937
4173	-0.387904	-0.583682	-0.413175	-0.53211	-0.636998	-0.509884
4174	-0.700931	-0.650265	-0.686676	-0.665183	-0.812002	-0.702121
4175	-0.480985	-0.284058	-0.666992	-0.668098	-0.621612	-0.543456
4176	-0.725718	-0.744309	-0.865845	-0.746343	-0.934106	-0.802373
4323	0.273219	0.44724	0.634939	0.571455	0.475543	0.481372
4354	0.186619	0.411879	0.414258	0.223194	0.289494	0.305981
4359	0.440776	0.473186	0.293944	0.429375	0.471711	0.422693
4430	-0.328417	-0.278009	-0.34993	-0.272565	-0.282558	-0.289975
4436	-0.437748	-0.417503	-0.371941	-0.755723	-0.667507	-0.529201
4522	-0.237477	-0.279025	-0.278116	-0.32425	-0.34006	-0.290893
4547	0.294249	0.2473	0.496777	0.215038	0.295076	0.310581
4597	0.775222	1.47761	1.12554	1.46347	0.839171	1.13709
4598	0.449458	1.37402	0.694083	0.910243	0.455279	0.724971
4605	-1.09676	-1.00846	-0.779142	-1.34219	-1.38143	-1.12072
4670	-0.172453	-0.140283	-0.178023	-0.280434	-4.88651	-0.177867
4688	1.38585	1.08534	0.719234	0.552531	1.14283	1.00073
4735	-0.219246	-0.329415	-0.260249	-0.263572	-0.229104	-0.259424
4758	0.325899	0.368969	0.381431	0.357819	0.289846	0.345685
4783	0.237307	0.213711	0.257395	0.422237	0.266331	0.280289
4792	0.275566	0.20802	0.328906	0.221184	0.221493	0.251927
4864	0.320431	0.50556	1.15617	0.513245	0.382723	0.382484
4885	0.812857	1.03896	1.09648	1.12263	0.885194	0.992116
4902	0.74728	0.743724	0.865999	0.57954	0.550105	0.698214
5016	0.999106	1.39298	0.885647	0.927438	1.26718	1.09538
5025	0.463987	0.390011	0.370196	0.396394	0.291914	0.383392
5027	0.802307	0.702683	0.754451	0.793215	0.790443	0.769514
5036	-0.182449	-0.29503	-0.578036	-0.262957	-0.190602	-0.256227
5092	0.272026	0.20717	0.21929	0.181584	0.186281	0.214163
5106	0.390051	0.244334	0.271137	0.245874	0.287149	0.288602
5111	-0.344073	-0.393961	-0.484333	-0.512901	-0.543047	-0.454771
5159	0.281617	0.660742	0.647359	0.495817	0.34767	0.487533
5163	-0.537644	-0.82557	-0.561906	-1.03337	-0.497908	-0.577603
5166	0.617109	0.33715	0.265702	0.599109	0.494323	0.463575
5210	0.587169	0.641388	0.8573	0.977839	0.859676	0.785556
5226	0.31993	0.381576	0.259407	0.345304	-0.597167	0.300545
5264	0.346899	0.286646	0.355595	0.285665	0.412477	0.33835
5265	11.0543	0.538782	0.264561	0.621562	-0.868158	-0.371217
5318	-0.236061	-0.447257	-0.666388	-0.508848	-0.389246	-0.448667
5352	-0.532919	-0.788177	-0.731212	-0.753252	-0.665826	-0.693384
5358	-0.446991	-0.410393	-0.4536	-0.336542	-0.382862	-0.359087
5428	-0.675087	-0.933705	3.38122	-0.512201	-0.821121	-0.71216
5519	-0.461031	-0.248224	-0.382201	-0.239764	-0.272844	-0.226239
5524	-0.481231	0.295278	-0.574456	-0.514678	0.23621	-0.446053
5581	-0.520528	-0.407053	-0.570157	-0.742218	-0.547507	-0.498917
5604	-0.248425	-0.468487	-0.536025	-0.508207	-0.344003	-0.420136
5624	0.192679	0.203615	0.45143	0.826462	0.1895	0.257624
5652	0.463052	0.58687	0.743882	0.649081	0.481916	0.585852
5719	-0.134586	-0.243684	-0.249673	-0.258011	-0.202389	-0.216776
5763	0.236515	0.373211	0.540224	0.273221	0.300628	0.345653
5819	-0.364431	-0.400635	-0.211744	-0.288928	-0.379806	-0.311411
5822	-0.304911	-0.21054	-0.37834	-0.287245	-0.34213	-0.303741
5825	-0.279467	-0.363849	-0.286638	-0.386438	-0.342989	-0.330983
5874	0.479816	0.524373	0.619306	0.528612	0.543168	0.539944
5881	0.43739	0.559765	0.552657	0.646042	0.52613	0.545286
5898	-0.265761	-0.338678	-0.371476	-0.452275	-0.31966	-0.348677
5901	-0.16775	-0.23328	-0.348092	-0.322639	-0.152923	-0.244044
5902	-0.343144	-0.288112	-0.250693	-0.396973	-0.312912	-0.318268
5912	0.280582	0.285746	0.254191	0.379282	0.363275	0.313509
5917	-0.186296	-0.230938	-0.330638	-0.172578	-0.203411	-0.223879
5918	-1.32315	-0.565069	-1.09426	-0.918015	-1.35245	-1.04972
5935	-0.3133	-0.344113	-0.325221	-0.504705	-0.470605	-0.372153
5937	-0.346741	-0.591061	-0.716411	-0.540683	-0.388073	-0.40288
5962	-0.15264	-0.286026	-0.343554	-0.381511	-0.181148	-0.268083
5983	-0.472647	-0.37675	-0.604357	-0.479434	-0.571434	-0.500034
6059	-0.223928	-0.304294	-0.420349	-0.260098	-0.226582	-0.286157
6095	0.673837	0.581916	0.476949	0.615914	0.410245	0.546248
6117	-0.165342	-0.174411	-0.245142	-0.218973	-0.235648	-0.20701
6120	-0.266811	-0.225724	-0.492455	-0.411058	-0.375869	-0.257111
6155	-0.236826	-0.470714	-0.438837	-0.473377	-0.398546	-0.402768
6204	-0.295446	-0.310525	-0.46929	-0.581098	-0.384562	-0.407291
6236	-0.782957	-0.850633	-1.05658	-0.968686	-0.659532	-1.04325
6240	-0.273973	-0.217775	-0.390362	-0.329932	-0.349977	-0.311511
6307	0.761412	1.30648	1.04067	1.37476	0.82824	1.06321
6309	0.67148	0.917809	0.634996	0.992284	0.694692	0.783145
6319	0.506814	0.998214	0.734929	0.931655	0.541673	0.74355
6376	0.789551	0.541705	0.763934	0.647596	0.753927	0.700235
6426	-0.171383	-0.216757	-0.61331	-0.295476	-0.591455	-0.544977
6428	-0.253302	-0.356454	-0.322266	-0.423927	-0.233533	-0.301162
6432	-0.235158	-0.39779	-0.478775	-0.491507	-0.685366	-0.485953
6455	-0.262627	-0.348154	-0.381043	-0.286661	-0.253399	-0.305483
6470	0.396526	0.806987	0.388557	0.781047	0.368934	0.697223
6520	0.678364	0.524117	0.352486	0.652716	0.509665	0.544363
6536	1.20171	0.679873	1.06617	0.923198	1.12671	1.00044
6567	-0.261313	-0.270125	-0.219988	-0.431266	-0.244721	-0.28459
6576	0.184639	0.358964	0.393039	0.353746	0.265261	0.312023
6584	-0.279002	-0.727289	-0.832137	-0.798832	-0.374351	-0.60143
6625	-0.394195	-0.202592	1.3823	-0.248903	-0.254954	-0.183936
6648	0.615555	0.944022	0.472298	1.08673	0.737065	0.796748
6653	0.776468	0.882289	0.896982	0.816641	0.643145	0.803993
6659	0.264918	0.207665	0.306125	0.196053	0.3968	0.275206
6666	0.652704	0.669331	0.852988	0.761751	0.830118	0.754274
6675	-0.200403	-0.328286	-0.471042	-0.226116	-0.426773	-0.329632
6696	-1.81561	-1.12827	-1.24067	-1.40875	-1.60989	-1.38853
6713	0.587255	1.06798	0.601809	1.05591	0.641244	0.791733
6716	1.17791	1.00544	0.880654	1.02916	1.23559	1.06665
6717	-0.548573	-0.520267	-0.635868	-0.355653	-0.552319	-0.569679
6721	0.196119	0.407845	0.376324	0.469243	0.2119	0.333179
6723	-0.342802	-0.34739	-0.606737	-0.264206	-0.411661	-0.323524
6747	-0.26229	-0.32234	-0.280253	-0.368377	-0.323926	-0.310544
6772	-4.69636	-0.352935	-0.455151	-0.283726	-0.390527	-1.25528
6812	0.434056	0.807896	0.935444	1.2257	0.537055	0.788906
6822	0.458155	0.544326	0.482488	0.513533	0.242894	0.44917
6829	-0.346256	-0.296716	-0.485018	-0.302893	-0.415202	-0.317315
6920	0.308735	0.631981	0.638058	0.445063	0.297497	0.465152
6950	-0.441934	-0.488934	-0.401054	-0.539737	-0.282757	1.09336
6996	-0.298585	-0.451385	-0.461192	-0.361411	-0.437071	-0.401037
7009	0.286614	0.374615	0.22607	0.382088	0.387024	0.214678
7037	-0.154083	-0.205559	-0.34983	-0.222653	-0.208911	-0.227314
7049	0.862939	0.912598	0.970454	1.05714	0.480656	0.857646
7052	-0.39927	-0.982852	-1.87667	-0.577966	-0.477491	-0.733719
7057	-0.343289	-0.807938	-0.815789	-0.661682	-0.352778	-0.595402
7069	1.18466	2.43287	1.91804	2.22543	1.46633	1.84634
7104	0.142386	0.395385	0.548103	0.592833	0.277868	0.310602
7105	0.19037	0.219278	0.309364	0.233938	0.178456	0.227174
7108	0.914165	1.41277	0.987985	0.964048	0.816008	1.01988
7111	0.530531	0.646967	0.547617	0.803013	0.502524	0.607022
7127	-0.665887	-0.621668	-0.834094	-0.433401	-0.511373	-0.587166
7133	-0.323546	-0.230769	-0.237722	-0.306433	-0.459546	-0.310713
7153	-0.877542	-0.433591	-0.47814	-0.675421	-0.88256	-0.668561
7159	0.454893	0.545422	0.384998	0.462079	0.470221	0.464416
7165	-0.14477	-0.206893	-0.34915	-0.1901	-0.190744	-0.215438
7272	-0.922052	-0.699612	-0.554656	-0.820225	-0.943604	-0.787166
7274	-0.308237	-0.336126	-0.25596	-0.474308	-0.541588	-0.382353
7280	0.201848	0.194323	0.178492	0.238926	0.260499	0.215711
7314	0.310884	0.374286	0.267658	0.308567	0.329848	0.319142
7345	0.540415	0.453935	0.652412	0.480821	0.397816	0.505972
7357	-0.278843	-0.532465	-0.38015	-0.349702	-0.200133	-0.347365
7360	-0.324269	-0.469769	-0.450269	-0.518285	-0.376034	-0.426832
7363	0.456457	0.671034	0.636158	0.366291	0.487887	0.524458
7365	-0.94828	-0.484767	-0.592632	-0.679409	-0.708037	-0.681731
7374	0.341129	0.216536	-0.915026	0.282437	-1.14758	-0.99537
7390	-0.583107	-0.604577	-0.516392	-0.639943	-0.496488	-0.567209
7408	-0.287329	-0.341166	-0.396117	-0.310836	-0.198502	-0.305897
7414	-0.254342	-0.429203	-0.390543	-0.305735	-0.299852	-0.335042
7430	-0.265659	-0.362437	-0.254047	-0.252746	-0.314327	-0.28895
7431	0.139775	0.333857	0.343035	0.221111	0.41429	0.291307
7570	0.530487	0.413835	0.269237	0.295379	0.505204	0.403723
7580	0.70709	0.609968	0.857657	0.686354	0.432804	0.659653
7718	0.599531	0.815783	0.725635	0.79009	0.958555	0.778842
7763	0.224354	0.138076	0.198957	0.310012	0.18782	0.212737
7832	0.491883	0.419929	0.419286	0.521594	0.612591	0.493954
7844	0.325487	0.287822	0.424463	0.396656	0.392744	0.366328
7846	0.572796	1.35255	0.829841	0.857688	1.09308	0.942088
7855	0.138861	0.200969	0.268597	0.235204	0.176715	0.204962
7873	0.498307	0.582791	0.616704	0.48026	0.261102	0.488725
7884	-0.218286	-0.231099	-0.358592	-0.238135	-0.370264	-0.282383
8031	0.654002	1.39391	0.401289	0.488056	0.644775	0.511473
8204	-0.435064	-0.630624	-0.576492	-0.768882	-0.584928	-0.598306
8237	0.398268	0.447226	0.557627	0.517376	0.336045	0.4522
8263	0.222812	0.305273	0.448194	0.321256	0.215994	0.303598
8303	-0.589996	-0.660599	-0.524001	-0.770499	-0.580276	-0.624187
8322	0.294613	0.558155	0.600065	0.501062	0.470319	0.485735
8408	0.531289	0.731886	0.87546	0.76367	0.600863	0.701525
8467	-0.127789	-0.265028	-0.265989	-0.359591	-0.1469	-0.232166
8504	-0.311152	-0.387499	-0.376691	-0.33114	-0.300028	-0.340409
8507	-0.362334	-0.807797	-1.01546	-0.775642	-0.434331	-0.67822
8508	0.442565	0.603109	0.487087	0.531935	0.423284	0.498489
8517	0.295557	0.309435	0.396599	0.264784	0.36405	0.326978
8529	0.205957	0.654548	0.484553	0.453693	0.234741	0.40759
8540	-0.461986	-0.497363	-0.304757	-0.65606	-0.455205	-0.474181
8568	-0.326653	-0.373441	-0.962878	-0.232942	-0.323976	-0.308168
8605	0.968421	0.973807	0.926768	0.905553	0.979416	0.951685
8631	1.09443	1.32664	1.3162	1.1523	1.03882	1.18656
8660	0.54363	0.18395	0.349642	0.372883	0.484339	0.387782
8671	-0.483928	-0.694921	-0.524388	-0.607957	-0.417727	-0.544891
8727	-0.478552	-0.386278	-0.41188	-0.37571	-0.238652	-0.326616
8766	-0.682153	-0.718435	-0.510659	-0.747394	-0.557688	-0.642373
8787	1.11517	1.19713	0.897642	0.742124	1.19047	1.0294
8829	-0.578927	-0.948061	-0.404691	-0.402784	-0.769782	-0.619958
8833	-0.25514	-0.295451	-0.28786	-0.237071	-0.306235	-0.275459
8848	0.459181	0.509449	0.527927	0.440186	0.436683	0.475578
8878	0.840017	0.338492	-0.404138	0.463405	0.387019	0.890589
8886	-0.142027	-0.267271	-0.295903	-0.210232	-0.167561	-0.215706
8942	0.271657	0.33352	0.447761	0.351176	0.291877	0.340005
8974	0.309899	0.199034	0.412146	0.300391	0.508997	0.274559
9032	0.331992	0.355595	0.490927	0.38628	0.203665	0.368815
9049	0.362669	0.344677	0.298716	0.27371	0.241722	0.305191
9052	-0.594011	-1.03101	-0.456809	-0.855171	-0.543034	-0.695129
9069	0.492846	0.481841	0.368986	0.520989	0.402874	0.4544
9099	-1.00036	-1.3165	-1.13421	-1.03932	-1.1389	-1.13503
9154	0.333158	0.600634	0.530053	0.545195	0.552592	0.501802
9221	-0.323709	-0.494188	-0.378415	-0.411617	-0.424267	-0.405547
9235	0.315775	0.257893	0.360267	0.281686	0.3996	0.256586
9236	0.425304	0.2218	0.479394	0.222455	0.299233	0.25441
9240	0.396697	0.380696	0.280901	0.472138	0.449035	0.396787
9245	0.514492	0.722051	0.409123	0.480595	0.420224	0.510191
9258	0.262649	0.373401	0.221219	0.302717	0.256901	0.284271
9266	0.249409	0.334969	0.526499	0.319678	0.268504	0.265376
9314	0.626948	0.665157	2.09507	0.71776	0.688666	0.594336
9319	-0.734573	-0.621414	-0.845415	-0.856804	-0.794584	-0.769669
9334	-0.52101	-0.524566	-0.43006	-0.585636	-0.556436	-0.522649
9349	-0.43519	-0.369808	-0.297043	-0.574879	-0.429041	-0.420299
9368	-0.318376	-0.320313	-1.25038	-0.290386	-0.283174	-0.282134
9411	-0.349861	-0.379545	-0.412885	-0.355974	-0.257613	-0.350282
9415	0.576242	1.14463	0.735604	0.984214	0.673854	0.823802
9420	0.332058	0.504176	0.357077	0.467192	0.512882	0.435571
9448	-0.423868	-0.402896	-0.623982	-0.373719	-0.408471	-0.391571
9466	0.559136	0.582378	0.677264	0.819519	0.67502	0.663545
9479	0.701749	0.879596	0.846801	0.861136	0.871772	0.833104
9518	0.508991	0.375655	0.697575	0.735329	0.585927	0.581588
9534	0.460972	0.429694	0.343584	0.435369	0.418874	0.418592
9540	0.354409	0.340928	0.292833	0.245239	0.282902	0.304155
9620	-0.758641	-0.927388	-0.539074	-0.801219	-1.21676	-0.640482
9663	0.607543	0.581972	0.802865	0.752161	0.67134	0.684069
9697	-0.303792	-0.493054	-0.412841	-0.362293	-0.30886	-0.375275
9709	0.677081	0.545554	0.518226	0.502283	0.412203	0.549646
9711	-0.597366	-0.624973	-0.582386	-1.02699	-0.653643	-0.577613
9761	-0.457006	-0.458782	-0.40582	-0.425772	-0.584086	-0.465401
9774	-0.483502	-0.341392	-4.43215	-0.412688	-0.49438	-0.383656
9775	-0.14997	-0.255344	-0.362331	-0.223392	-0.263163	-0.249947
9790	-0.39632	-0.340041	-0.400742	-0.275251	-0.357796	-0.353137
9791	-0.145355	-0.38059	-0.500519	-0.237321	-0.209047	-0.189085
9817	0.271856	0.217627	0.211599	0.201839	0.276877	0.236853
9935	0.502034	0.68521	0.737901	0.461072	0.508982	0.579933
9943	-0.281203	-0.38519	-0.402515	-0.278002	-0.258947	-0.320278
9948	-0.19059	-0.327559	0.662051	-0.387028	-0.206145	-0.258588
10014	0.442734	0.344927	0.413438	0.276652	0.364533	0.369349
10020	0.503965	0.704343	0.742004	0.730879	0.51343	0.639817
10023	0.646686	0.829269	1.01809	0.961536	0.689421	0.829874
10036	-0.658852	-0.542946	-0.597083	-0.817402	-0.64039	-0.65044
10051	-0.554027	-0.468117	-0.3675	-0.568838	-0.520187	-0.469172
10056	-0.210811	-0.295763	-0.386714	-0.305538	-0.280902	-0.295053
10058	0.525105	0.455623	0.384916	0.326871	0.456098	0.430616
10079	0.441003	0.562863	0.442416	0.548024	0.43298	0.48635
10096	-0.176866	-0.363732	-0.464719	-0.345829	-0.202999	-0.288313
10152	-0.499985	-0.400062	-0.720896	-0.585826	-0.448161	-0.530092
10154	0.474397	0.716636	0.902443	0.922095	0.399351	0.683853
10171	0.674998	0.71267	1.0239	0.810815	0.594232	0.764214
10189	-0.232442	-0.278523	-0.287476	-0.333622	-0.268893	-0.279298
10209	0.357478	0.31588	0.408014	0.399047	0.33391	0.352952
10231	0.409673	0.841335	0.861519	0.845712	0.401507	0.672816
10383	0.183919	0.198566	0.183027	0.189869	0.175111	0.186991
10403	-0.935089	-0.782945	-0.481028	-0.839652	-1.01843	-0.810572
10417	0.366877	0.534195	0.939344	0.777689	0.599467	0.45137
10452	-0.383811	-0.580274	-0.450085	-0.31863	-0.449571	-0.37801
10484	-0.12722	-0.174679	-0.253911	-0.255293	-0.23439	-0.208206
10493	0.295336	0.337002	0.320765	0.304596	0.299562	0.312345
10528	-1.09157	-0.949731	-0.413355	-0.875097	-1.20959	-0.90533
10553	0.397815	0.233101	0.515426	0.588064	0.350426	0.350963
10567	0.245671	0.329352	0.471173	0.297988	0.284263	0.326582
10577	0.349369	0.327226	0.513955	0.393556	0.323378	0.382389
10606	-0.578407	-0.938287	-1.04183	-0.855793	-0.709156	-0.763864
10607	-0.439831	-0.398135	-0.318682	-0.327621	-0.421929	-0.380347
10611	-0.283808	-0.451698	-0.339582	-0.377381	-0.30257	-0.350115
10615	-0.897262	-0.594004	-0.411173	-0.851743	-0.98504	-0.746967
10616	1.46604	0.512456	0.691184	0.439062	0.313497	1.00055
10628	0.536187	0.341457	0.603119	0.452215	0.316798	0.450843
10656	0.33165	1.26277	0.286481	0.291936	0.23934	0.269156
10672	0.369927	0.404856	0.216995	0.378764	0.506059	0.376213
10682	0.555184	0.878849	0.664996	0.809549	0.510435	0.684695
10724	0.267408	0.28025	0.221954	0.314009	0.309517	0.279521
10755	-0.235731	-0.430359	-0.568376	-0.572643	-0.282446	-0.590226
10769	-0.38983	-0.708091	-0.808742	-0.60054	-0.304917	-0.561531
10772	-0.860137	-0.404187	-0.601911	-0.755268	-0.591833	-0.56919
10785	-0.392595	-0.573999	-0.585044	-0.563584	-0.636914	-0.495228
10801	-0.706372	-0.544547	-0.792615	-0.452126	-0.573605	-0.61296
10809	0.338686	0.352618	0.766948	0.360299	0.425953	0.565995
10861	0.468584	0.843407	0.680832	0.675151	0.436232	0.621731
10885	-0.226049	-0.351248	-0.443128	-0.203294	-0.287733	-0.301397
10890	-0.132797	-0.349847	-0.302111	-0.347228	0.277049	-0.252025
10923	1.67695	-0.342018	-0.245355	-0.433104	-0.253521	-0.293798
10924	0.548482	0.558709	0.63997	0.663603	0.612438	0.605533
10940	-0.588099	-0.639954	-0.54953	-0.613858	-0.653463	-0.581172
10961	0.285695	0.23843	0.370366	0.222869	0.193796	0.263124
10963	-0.193279	-0.225944	-0.218606	-0.168725	-0.231875	-0.206793
10969	-0.153061	-0.28974	-0.277155	-0.32507	-0.218253	-0.251763
10970	0.325596	0.342997	0.452349	0.333337	0.342367	0.360222
10979	-0.234757	-0.394764	-0.447327	-0.324512	-0.279815	-0.335342
10982	0.778779	0.597172	1.47366	1.02664	0.834265	1.06698
10993	-0.644499	-1.47959	-0.76616	-0.854345	-1.42232	-1.03249
11004	-1.01885	-0.787878	-0.737793	-0.740132	-1.02004	-0.860066
11040	0.45871	0.359332	0.312954	0.459084	0.381569	0.395222
11051	-0.279103	-0.378526	-0.476157	-0.451086	-0.39484	-0.39505
11067	0.838654	0.624181	0.744307	0.935103	0.731882	0.775719
11137	-0.290836	-0.31731	-0.432834	-0.32405	-0.34661	-0.307439
11152	0.590247	0.259304	0.340008	0.335271	0.310742	0.27001
11161	0.723412	1.14502	0.946225	1.07876	0.695513	0.918679
11186	-0.535554	-0.555557	-0.528916	-0.523306	-0.50002	-0.527778
11198	-0.275541	-0.33489	-0.426595	-0.275737	-0.330751	-0.32781
11221	0.225213	0.26611	0.3933	0.372104	0.338736	0.319985
11335	-0.134895	-0.239209	-0.186061	-0.591501	-0.17721	-0.382326
11337	0.785525	0.71065	0.440954	0.9705	0.606608	0.754479
11338	-0.234241	-0.294402	-0.239005	-0.330451	-0.16242	-0.251211
11343	0.158487	-0.244812	-0.178312	-0.257338	-0.201833	-0.220362
11344	0.393815	0.332086	0.231474	0.235681	0.447582	0.329021
22868	-0.218493	-0.497675	-0.460805	-0.433349	-0.366581	-0.410608
22902	-0.442945	-0.370105	-0.556082	-0.723036	-0.466839	-0.318357
22928	0.293847	0.456938	0.333202	0.3745	0.225142	0.337619
22949	0.521177	0.58132	0.824075	0.694933	0.574526	0.604385
22974	-0.682446	-0.436382	-0.500385	-0.722658	-0.778428	-0.62317
23087	0.302108	0.202247	0.18256	0.347928	0.287675	0.265397
23151	-0.799878	-0.500923	-0.406038	-0.687153	-0.826727	-0.643257
23165	-0.215134	-0.247248	-0.533731	-0.186915	-0.287424	-0.293197
23175	0.431196	1.08197	0.949443	1.1615	0.769559	0.843345
23200	-0.416341	-0.417695	-0.378153	-0.377395	-0.391944	-0.395413
23203	-0.205824	-0.198907	-0.256032	-0.214554	-0.208499	-0.21587
23210	-0.260455	-0.367841	-0.292578	-0.282261	-0.338113	-0.307359
23239	-0.443375	-0.464449	-0.516043	-0.434744	-0.339175	-0.438664
23246	-0.293953	-0.293127	-0.319938	-0.365473	-0.287893	-0.311184
23286	-0.754771	-0.459498	-0.649814	-0.567495	-0.668103	-0.566693
23350	-0.601919	-0.645465	-0.580688	-0.615346	-0.661982	-0.546868
23351	0.229919	0.3506	0.323664	0.306668	0.262176	0.295498
23352	-0.370689	-0.36621	0.792495	-0.559521	0.714605	-0.308309
23363	0.312414	0.643608	0.837955	0.356103	0.446859	0.424015
23401	0.419525	0.468384	0.545948	0.447438	0.429523	0.463055
23466	0.397718	0.371623	0.35672	0.516307	0.459546	0.421276
23467	0.977636	0.630556	0.724566	0.917664	1.18674	0.888494
23475	0.525094	0.764619	0.852091	0.820688	0.556313	0.704654
23484	0.534658	0.407557	0.665417	0.465169	0.557525	0.526956
23511	-0.360607	-0.235032	-0.43188	-0.245504	-0.33617	-0.320946
23550	-0.308831	0.230871	0.33815	0.316725	0.23299	0.241258
23555	-0.689225	-0.396489	-0.605786	-0.788414	-0.619428	-0.618976
23558	0.19826	0.294553	0.315425	0.344393	0.204552	0.27233
23564	1.19089	0.962052	5.94366	0.949883	1.32958	0.96398
23596	-0.525557	-0.662552	-0.805909	-0.509397	-0.419265	-0.583642
23598	0.733226	0.7881	0.942037	0.474318	0.470158	0.647064
23603	-0.177915	-0.393963	-0.418121	-0.337827	-0.203338	-0.30534
23624	-0.616732	-0.340656	-0.304951	-0.306784	-0.341738	-0.381279
23625	0.605826	0.681492	0.520457	0.503628	0.862713	0.635722
23644	-0.338937	-0.257571	-0.38036	-0.290682	-0.336936	-0.320004
23645	0.346316	0.367761	0.320077	0.443469	0.405058	0.37743
23670	-0.311228	-0.250017	-0.464213	-0.270151	-0.444696	-0.347168
24137	-0.751242	-0.696758	-0.528632	-0.955432	-0.95294	-0.776145
24148	-0.264501	-0.209461	-0.21362	-0.203462	-0.251251	-0.227566
25805	0.259727	0.183193	0.340363	0.207412	0.353448	0.269722
25814	-0.191234	-0.354668	-0.76389	-0.450512	-0.184578	-0.420037
26010	-0.289184	-0.438312	-0.767263	-0.314428	-0.450672	-0.33502
26135	-0.184867	-0.334766	-0.279405	-0.234217	-0.19437	-0.237924
26155	-0.234654	-0.239573	-0.333063	-0.432015	-0.237789	-0.25387
26227	0.794499	0.711994	0.753098	0.678491	0.652809	0.719072
26240	0.56821	0.686984	0.577871	0.519951	0.677123	0.606923
26268	-0.484206	-0.401549	-0.407181	-0.483357	-0.445792	-0.41274
26287	-0.567609	-0.560036	-0.659712	-1.37356	-1.16449	-0.864227
26291	1.878	1.74932	1.61217	1.65092	2.16019	1.81113
26292	-0.339333	-0.550674	-0.399119	-0.567515	-0.451881	-0.460813
26354	-0.206368	-0.241678	-0.286645	-0.185034	-0.237221	-0.230496
26503	0.198809	0.245944	0.274271	0.27836	0.284664	0.257303
26577	0.55114	0.56239	0.397523	0.519931	0.892535	0.482325
26959	0.502434	0.406256	0.631866	0.392567	0.68754	0.521491
27013	-0.360345	-0.411313	-0.321663	-0.461986	-0.288708	-0.36791
27113	0.549492	0.715526	0.872189	0.85124	1.23267	0.718014
27131	-0.344548	-0.289818	-0.396918	-0.352528	-0.362884	-0.348446
27242	0.23711	0.332439	0.250364	0.285127	0.322892	0.28648
27244	0.479963	0.356403	0.352732	0.35201	0.440718	0.397259
27250	0.311285	0.48704	0.711506	0.558754	0.28897	0.472401
27284	-0.804837	-0.522362	-0.349321	-0.52414	-0.740311	-0.587301
27289	0.291594	0.585888	0.505284	0.247734	0.355745	0.398142
27316	-0.387216	-0.535437	-0.669584	-0.216527	-0.402402	-0.483834
27329	-0.393523	-0.446573	-0.27705	-0.577202	-0.302602	-0.398497
27341	-0.208068	-0.257566	-0.230686	-0.33151	-0.171196	-0.238912
27346	0.846722	1.46112	1.15854	1.45461	0.86657	1.15841
28988	-0.347556	-0.24844	-0.217044	-0.24649	-0.219924	-0.254998
29015	0.15126	0.333138	0.324393	0.382194	0.217444	0.282579
29028	-0.838018	-0.59515	-0.499923	-0.78282	-0.67915	-0.67812
29842	0.98231	0.982298	0.734755	1.42715	1.15968	1.05819
29881	0.228632	0.545639	0.575334	0.600653	0.422264	0.475397
29889	-0.247253	-0.229337	-0.373869	-0.27422	-0.266447	-0.277332
29968	0.832785	0.350005	0.233432	0.363086	0.494583	0.455672
29980	-0.631669	-0.805399	-0.658324	-0.730687	-0.720721	-0.708474
30061	0.448995	0.421299	0.475028	0.559431	0.514992	0.484842
50628	-0.208846	-0.353587	-0.518178	-0.277374	-0.304571	-0.331618
50813	-0.47206	-0.435706	-0.414017	-0.393642	-0.453604	-0.432913
50814	0.878868	1.05948	0.885295	1.10555	0.726659	0.932064
51018	-0.24451	-0.32113	-0.258992	-0.271508	-0.255713	-0.269478
51065	0.175027	0.390692	0.345941	0.208895	0.186595	0.209047
51068	-0.160386	-0.253516	-0.340948	-0.242008	-0.153055	-0.229089
51088	-0.319716	-0.32057	-0.336464	-0.376688	-0.272398	-0.284493
51090	0.584346	0.900172	0.87957	1.09661	0.77919	0.84887
51109	0.346252	0.479945	0.521469	0.451909	0.326294	0.426067
51129	-0.369684	-0.862177	-0.670665	-0.837772	-0.456128	-0.698378
51154	-0.189295	-0.393108	-0.402177	-0.266749	-0.330757	-0.315525
51177	0.478587	0.935905	0.824732	0.563842	0.683166	0.698151
51179	0.377464	0.338703	0.258467	0.26471	0.338884	0.316538
51246	0.233232	0.180048	1.08032	0.714302	0.138404	0.195178
51268	-1.61134	0.368748	0.576201	0.337698	-1.12678	-1.46458
51422	-0.327662	-0.698934	-0.470627	-0.555569	-0.40406	-0.490477
51478	0.64507	1.22212	0.916895	1.10892	0.58213	0.895915
51491	-0.256418	-0.292764	-0.29802	-0.265731	-0.258173	-0.273328
51497	-0.172499	-0.222149	-0.195839	-0.207891	-0.191089	-0.197
51512	-0.97895	-0.763521	-0.644488	-0.809896	-1.07252	-0.853014
51514	-1.13373	-1.37803	-1.61	-1.53724	-1.40895	-1.41271
51582	0.321838	-5.85906	-0.230629	0.590785	0.15813	0.26632
51596	0.71059	0.526385	0.895832	0.630168	0.446111	0.501944
51655	0.688536	0.737529	1.22778	0.882875	0.573958	0.823027
51659	-0.858432	-1.17605	-1.12169	-1.35309	-1.16738	-1.13446
51696	0.279199	0.246105	0.430801	0.439684	0.41699	0.36345
51760	0.478112	1.03263	1.00121	0.741744	0.54574	0.760771
51768	0.332739	0.325337	0.223738	0.226394	0.30032	0.282599
51776	0.267425	0.181806	0.292926	0.280755	0.35513	0.276502
53354	0.517717	0.521929	0.392148	0.637577	0.553066	0.525381
54206	0.421441	0.182747	0.367099	0.561988	0.480856	0.403719
54363	0.216996	0.458931	0.785299	0.508212	0.169763	0.428731
54438	-0.620989	-0.904524	-0.941486	-0.735157	-0.75954	-0.791447
54521	-0.43005	-0.527315	-0.537613	-0.51627	-0.485571	-0.498472
54659	-0.696029	-0.671996	-0.514316	-0.512596	-0.885362	-0.655172
54785	0.466646	0.681644	0.632666	0.623271	0.544734	0.590684
54873	-0.921535	-0.665141	-0.839391	-0.995604	-0.867587	-0.856959
54888	-0.33698	-0.404379	-0.372538	-0.326678	-0.308384	-0.348899
54913	0.62287	0.775886	0.624346	0.978093	0.754441	0.752023
54921	0.170408	-1.02747	-2.13646	-1.06564	-0.881612	-1.27621
54988	0.558669	0.5326	0.712998	0.379044	0.544953	0.546545
55002	0.16025	0.270191	0.371244	0.255498	0.217563	0.255842
55084	0.849389	0.894047	1.03926	1.06139	0.788965	0.927484
55090	0.644744	0.539381	0.551042	0.5745	0.506162	0.564058
55124	0.762308	1.53041	1.73013	1.43058	1.28108	1.34774
55165	-0.88106	-0.980349	-0.621884	-1.07531	-1.18684	-0.948275
55210	-0.212777	-0.287977	-0.287755	-0.284027	-0.299287	-0.273472
55230	-0.249529	-0.293877	-0.437824	-0.360885	-0.262722	-0.320074
55236	-0.221906	-0.281851	-0.273703	-0.26494	-0.16966	-0.241519
55281	0.413747	0.22347	0.47168	0.292477	0.352662	0.351699
55286	-0.321207	-0.446881	-0.4181	-0.355617	-0.58519	-0.344925
55323	0.69492	0.493921	0.654567	0.414429	0.661292	0.584723
55349	0.270554	0.690783	0.515155	0.598343	0.399819	0.495823
55388	-1.78692	-3.44586	-1.5958	-2.31584	-1.62471	-1.78512
55540	0.562138	0.500458	0.411289	0.4915	0.437683	0.481505
55631	-0.22919	-0.223033	-0.307237	-0.279892	-0.220982	-0.251174
55640	-0.163682	-0.550201	-0.303785	-0.234836	-0.328267	-0.315262
55646	-0.364345	-0.484489	-0.353732	-0.407112	-0.43108	-0.40726
55654	0.271493	0.310677	0.478104	0.325025	0.211752	0.320302
55720	-0.259317	-0.349218	-0.438237	-0.267258	-0.310291	-0.323971
55723	-1.05614	-1.19579	-1.11308	-1.31169	-1.64444	-1.26348
55726	-0.159708	-0.245681	-0.322311	-0.200176	-0.172688	-0.21922
55740	-0.267394	-0.449572	-0.38893	-0.450622	-0.260823	-0.362575
55776	0.527788	0.499913	0.570771	0.349983	0.425285	0.475637
55831	0.869107	0.579527	0.856861	0.954824	0.543572	0.761668
55902	0.726127	1.12978	0.920672	1.23365	0.772556	0.95745
55970	-0.163687	-0.406219	-0.612059	-0.402052	-0.181789	-0.352268
56259	-0.214659	-0.250322	-0.236435	-0.221135	-0.228348	-0.73334
56342	-0.336594	-0.295067	-0.333858	-0.601114	-0.281394	-0.411585
56521	0.518148	0.647925	0.709544	0.623124	0.442611	0.589163
56603	-2.97992	-5.48173	-4.07377	-3.09752	-6.85695	-4.51891
56647	-0.253161	-0.39729	-0.341725	-0.319805	-0.22088	-0.305679
56882	-0.270073	-0.370367	-0.373113	-0.387527	-0.257502	-0.330823
56888	0.318153	0.211969	0.180927	0.283713	0.294017	0.216927
56967	0.290346	0.253552	0.338631	0.367565	0.424789	0.33587
56999	-1.09928	-0.818525	-0.760306	-0.599473	-1.02845	-0.860321
57132	0.292649	0.233109	0.267799	0.252861	0.296919	0.26956
57215	0.494954	0.600117	0.557437	0.476133	0.550507	0.536724
57326	0.421625	0.354959	0.53284	0.393553	0.496375	0.440763
57510	-0.202095	-0.288615	-0.432258	-0.229025	-0.323273	-0.294161
57523	0.675699	0.730423	0.771418	0.78321	1.06678	0.80651
57590	-0.319078	-0.307647	-0.470136	-0.341647	-0.299131	-0.346635
57647	-0.166774	-0.209761	-0.339044	-0.207917	-0.208105	-0.225427
57674	-0.448173	-1.03299	0.75291	-0.343448	-0.947421	-0.35872
57761	0.779991	0.894055	0.581693	0.873016	0.711587	0.768962
58480	0.676911	1.01299	0.789011	0.845658	0.753697	0.816545
58528	0.29617	0.237646	0.219229	0.27154	0.237727	0.278462
58985	1.05075	1.02257	1.11714	0.843064	0.961718	0.999928
59339	-0.305088	-0.464141	-0.451889	-0.46956	-0.382675	-0.413779
60528	-0.243811	-0.559937	-0.472049	-0.379133	-0.307331	-0.260965
60626	-0.201826	-0.190304	-0.446078	-0.293095	-0.255989	-0.256835
64065	0.374082	0.245889	0.364461	0.333548	0.364384	0.337366
64122	0.24168	0.638614	0.7687	0.435494	0.381549	0.494098
64151	-1.18363	-1.19607	-0.735288	-0.837958	-1.14425	-1.01856
64342	0.43571	0.338893	0.290629	0.4114	0.345809	0.365381
64420	0.446055	0.514611	0.467665	0.669475	0.49649	0.519752
64787	-0.206444	-0.249284	5.40201	-0.2219	-0.215274	-0.214656
64856	-0.666596	-0.447747	-0.42934	-0.597016	-0.58705	-0.558921
64981	0.386825	0.384005	0.367052	0.350685	0.285898	0.355785
65083	-0.198054	-0.205032	-0.506108	-0.228672	-0.292642	-0.285208
65108	0.443451	0.544953	0.72374	0.33091	0.730262	0.555558
65124	0.377377	0.328642	0.218145	0.357659	0.402377	0.337733
65985	0.318181	0.463653	0.242148	0.518025	0.288964	0.367087
78996	-0.618649	-0.907271	0.778215	0.3741	0.558017	-0.423606
79083	0.334055	0.619402	0.754788	0.682862	0.391429	0.557393
79085	0.236194	0.227598	0.402362	0.410057	0.259199	0.307975
79140	1.09876	0.82168	1.17614	0.712145	0.83586	0.929748
79144	0.26716	0.400126	0.641903	0.493734	0.333447	0.428166
79629	0.541196	0.622219	0.535697	0.629178	0.895846	0.530975
79646	0.274841	0.467695	0.224061	0.436609	0.340515	0.349637
79660	0.281126	0.417142	0.360261	0.210134	0.219155	0.298456
79682	-0.814946	-0.789297	-0.739587	-1.14727	-1.06369	-0.910091
79683	0.305139	0.279582	0.723864	0.477717	0.32257	0.420527
79689	-2.06493	-2.29753	-0.989963	-1.78016	-2.62218	-1.95004
79711	-0.249816	-0.200074	-0.354815	-0.31805	-0.268358	-0.277329
79751	-0.51685	-0.453479	-0.503903	-0.306993	-0.291492	-0.413649
79882	-0.408823	-0.435726	-0.513424	-0.373834	-0.401881	-0.296752
79888	-1.15741	-0.778272	-0.752154	-3.41829	-1.09133	-0.895728
79924	0.740898	0.823359	0.995477	0.901862	0.588182	0.810844
79968	-1.11477	-1.43351	-1.09457	-1.65403	-1.34989	-1.32849
79971	0.414418	0.646715	0.543482	0.70063	0.51	0.563942
79982	-0.208193	-0.329916	-0.302338	-0.329094	-0.391891	-0.311395
80201	0.345695	0.470596	0.443941	0.61258	0.504234	0.476302
80218	-0.16904	-0.287497	-0.380673	-0.231631	-0.181466	-0.219459
80221	0.322423	0.316596	0.384132	0.427256	0.499555	0.390888
80777	0.504679	0.398946	0.941188	0.420014	0.821844	0.351057
80824	0.281098	0.243615	0.336204	0.243305	0.277997	0.277337
81543	0.289952	0.405006	0.528599	0.511644	0.426051	0.433142
81558	0.318655	0.610276	0.62827	0.593944	0.574309	0.545986
81603	0.177877	0.261055	0.529017	0.407406	0.336064	0.343176
81620	-1.1729	-1.20175	-1.0147	-1.2448	-1.52963	-1.23191
81631	0.390093	0.217525	0.262162	0.366064	0.2862	0.305302
81855	0.419312	0.337432	0.397926	0.35869	0.582844	0.420135
83658	0.284062	0.178726	0.337767	0.194156	0.192621	0.238359
84171	-0.373915	-0.252207	-0.250969	-0.608699	-0.409489	-0.378164
84193	-0.147771	-0.242121	-0.304894	-0.237536	-0.181576	-0.221887
84243	0.284737	0.358816	0.265202	0.424352	0.393468	0.346209
84275	0.383082	0.412851	0.244614	0.397849	0.309938	0.350559
84293	0.721032	1.02886	1.01369	1.01194	0.688314	0.772011
84331	0.360395	0.76937	0.649579	1.04574	0.801882	0.776647
84335	0.458345	0.552467	0.392373	0.510903	0.327162	0.449141
84419	-0.415726	-0.719008	-0.480769	-0.919889	-0.531377	-0.612461
84647	0.430071	0.744154	0.83639	0.571591	0.423896	0.602108
84706	0.431828	0.211628	0.276039	0.384835	0.298065	0.321372
84769	0.420617	0.569649	0.43743	0.403368	0.26295	0.419694
84823	-0.414803	-0.359049	-0.300902	-0.364457	-0.508126	-0.388577
84909	-0.471831	-0.549701	-0.414525	-0.441863	-0.399762	-0.454645
84916	-0.223946	-0.325779	-0.589077	-0.302958	-0.257174	-0.338893
84962	1.10273	0.666025	-0.496253	0.50702	0.947276	0.755194
84968	0.713407	0.804782	0.569242	0.938038	0.668058	0.739589
85453	0.529857	0.37707	0.408506	0.545594	0.634071	0.499945
85458	0.434682	0.320757	0.355321	0.314395	0.434366	0.372798
87178	-0.549119	-0.699866	-0.40755	-0.514858	-0.924036	-0.65163
89122	0.484024	0.439978	0.439938	0.522984	0.389936	0.456264
89866	0.522184	0.749581	0.730833	0.464688	0.485748	0.591498
89941	-0.293046	-0.221813	-0.367002	-0.257327	-0.264367	-0.279818
90102	4.94525	-0.884435	-0.423575	-0.470469	-0.739412	-0.43047
90313	0.416275	0.415048	0.405761	0.461534	0.471682	0.434955
90362	0.438821	0.895807	0.530407	0.536414	0.583268	0.597837
90423	0.853791	0.75834	0.623404	0.966336	0.668483	0.691446
90809	0.676899	0.591544	0.515057	0.629018	0.433799	0.548998
91703	0.518124	0.701356	0.872753	0.657498	0.579281	0.666687
91894	0.50369	0.420697	0.64345	0.398795	0.507988	0.495814
92154	-0.712296	-0.369299	-1.02602	-0.605967	-0.64759	-0.553488
92922	0.619993	0.53302	0.569415	0.767266	0.714198	0.641675
93129	0.481009	0.7631	0.78207	0.550026	0.519483	0.620029
93145	0.691322	0.834365	1.02768	0.759519	0.919752	0.84743
112817	-0.308117	-0.302229	-0.488704	-0.573668	-0.289572	-0.391564
112939	-0.354742	-0.306033	-0.457844	-0.361512	-0.325531	-0.360239
113130	-0.811111	-0.669512	-0.80371	-0.911104	-0.864871	-0.811175
113763	-0.579707	-0.456991	-0.402721	-0.502007	-0.254267	-0.438245
113791	0.977701	1.54427	0.978766	1.19425	1.23897	1.1877
114569	-0.245959	-0.382726	-0.440571	-0.416607	-0.342623	-0.364804
114793	0.244557	0.422606	0.308261	0.606983	0.485162	0.414409
115294	0.306472	0.228745	0.482412	0.300516	0.266244	0.317768
115708	-0.316857	-0.286991	-0.334822	-0.337776	-0.276513	-0.309699
116236	0.544999	0.412104	0.372874	0.534078	0.468887	0.467482
116238	0.875816	1.11455	0.560166	0.919796	0.892622	0.873488
116372	-0.708408	-1.02134	-0.747581	-1.28703	-0.998898	-0.95177
117246	-0.267138	-0.252859	-0.289255	-0.20293	-0.335933	-0.26873
117584	0.346255	0.520272	0.384419	0.416646	0.406046	0.628625
118471	0.368147	0.313067	0.41756	0.283456	0.298378	0.363888
121551	-0.284509	-1.04493	-0.843736	-0.859399	-0.638357	-0.733301
122416	0.664917	0.577083	0.627467	0.62574	0.491456	0.598219
122481	0.915376	1.40464	1.06982	1.33173	0.799375	1.10505
122970	0.441087	0.467582	0.39258	0.328196	0.295791	0.385939
126433	0.897586	0.748336	0.70435	0.825533	0.959744	0.828009
126917	-0.26464	-0.226488	-0.36856	-0.390801	-0.280856	-0.305377
127262	0.199827	0.246307	0.196346	0.198185	0.157644	0.200555
130340	-0.697698	-0.709293	-0.602623	-0.571382	-0.636835	-0.642677
130497	-0.829805	-0.908742	-0.857709	-0.916225	-1.07815	-0.917236
132158	-0.790071	-0.684082	-1.06107	-1.01197	-1.02632	-0.894528
134147	0.483438	0.50343	0.490347	0.484013	0.474409	0.48802
134429	0.489542	0.759749	0.556715	0.416586	0.570605	0.559533
135228	0.610261	0.496249	0.448904	0.372952	0.646529	0.515872
139231	-0.336364	-0.276448	-0.368608	-0.25167	-0.346855	-0.315097
140467	0.465003	0.732517	0.844172	0.67759	0.587704	0.662289
144423	0.345701	0.867824	0.665345	0.642513	0.513319	0.346111
145741	2.07752	2.64968	2.66114	2.45459	2.17966	2.4054
147463	0.763443	0.839965	0.651054	0.744002	1.0523	0.811068
150962	-0.581299	-0.608334	-0.537895	-0.629339	-0.637171	-0.597919
151195	-0.294842	-0.285931	-0.26958	-0.332742	-0.194618	-0.274649
151449	0.415941	0.361813	0.309466	0.49655	0.396722	0.396991
151742	0.61723	0.6814	0.863315	1.0234	0.619771	0.761912
152137	-0.250237	-0.420377	-0.462998	-0.404	-0.249051	-0.356439
153339	-0.243214	-0.294796	-0.267167	-0.300175	-0.216715	-0.26352
153830	-0.87156	-1.08227	-0.679867	-1.09225	-0.730504	-0.890394
155382	0.614302	0.918331	0.621365	0.870911	0.70435	0.74675
157570	-1.31147	-0.945625	-0.822061	-1.16666	-1.12032	-1.07236
157638	0.290595	0.423864	0.406961	0.396006	0.465399	0.397459
158158	0.301783	0.417453	0.343062	0.605047	0.465347	0.427434
162417	0.397487	0.714418	0.428471	0.504266	0.324893	0.474798
166012	0.237111	0.401699	0.459643	0.416729	0.309557	0.36584
170487	0.612424	1.0333	0.658235	0.806592	0.531148	0.729223
171546	0.286904	0.330263	0.345543	0.369539	0.360299	0.339403
171586	0.212426	0.248601	0.335853	0.26249	0.415377	0.295844
195828	-0.37197	-0.361193	-0.535759	-0.507293	-0.402441	-0.434838
201163	0.222997	0.410897	0.271811	0.408781	0.303903	0.324571
201232	0.439937	0.780246	0.934117	1.07697	0.519633	0.751071
201895	0.558966	0.701031	0.464287	0.214615	0.548599	0.431047
219743	0.367125	0.333725	0.340454	0.506775	0.316029	0.373713
220213	0.612711	0.508739	0.522195	0.477406	0.563608	0.537826
223082	0.278863	0.208774	0.207374	0.228187	0.293636	0.24426
254552	0.444048	0.650463	0.719092	0.675654	0.399805	0.578696
255488	-0.292535	-0.459087	-0.678244	-0.372091	-0.379565	-0.435412
255738	0.595647	1.29376	0.927952	1.21837	0.767294	0.961497
257364	0.287634	0.384157	0.510132	0.326519	0.35975	0.386819
259173	-0.666546	-0.625769	-0.686472	-0.532337	-0.972499	-0.695841
283927	0.751687	0.819532	0.937997	0.743857	0.700419	0.791586
283991	0.390366	0.253684	0.374487	0.471767	0.296956	0.358344
284111	0.35131	0.248957	0.397335	0.428224	0.33736	0.425306
284680	-0.866883	-0.603056	-0.603971	-0.507734	-0.731083	-0.661651
285282	-0.493891	-0.535368	-0.560947	-0.644298	-0.567943	-0.559598
285761	-0.238738	-0.504981	-0.520738	-0.470207	-0.245459	-0.395131
286343	0.781868	0.581142	0.461338	0.720796	0.688269	0.647577
326625	0.600494	0.820732	0.810218	0.968527	0.516892	0.700996
338094	0.709361	0.621246	0.747029	0.543164	0.816899	0.688446
340526	0.622973	0.81449	1.01074	0.835258	0.672391	0.792065
344838	0.391216	0.733811	0.58212	0.678475	0.583719	0.594761
353189	0.86668	1.51231	1.6364	1.12959	0.889115	1.20769
359948	0.451952	0.563813	0.607336	0.4126	0.38857	0.548024
360200	0.81765	1.1151	0.760955	1.22535	0.869736	0.958656
373156	0.146207	0.183797	0.283653	0.191827	0.172199	0.196429
374383	0.809134	1.27595	0.733038	1.27313	0.815991	0.982334
374882	0.276858	0.283772	0.402938	0.257985	0.189554	0.283114
387103	-0.598467	-0.537153	-0.470831	-0.817855	-0.461722	-0.576314
388125	1.77035	2.66683	2.3946	2.7464	2.50346	2.41831
389084	1.14889	1.34312	1.30766	1.22229	1.26683	1.25865
389332	0.831627	1.61955	1.14975	1.06082	0.728977	1.07901
390916	0.377761	0.2963	0.303868	0.314197	0.316067	0.322532
391059	0.5422	0.620585	0.60142	0.387654	0.330425	0.455249
400793	-0.543655	-0.529799	-0.320714	-0.358348	-0.558365	-0.461284
401720	0.834923	0.851139	1.49979	1.61315	1.15478	1.19168
404636	0.365697	0.297109	0.391001	0.277368	0.365513	0.340231
440275	0.706468	0.665646	0.871807	0.503897	0.78919	0.708296
440400	0.31039	0.392421	0.398433	0.588127	0.318652	0.41765
441518	0.807709	0.727821	0.714595	0.752214	0.714302	0.744228
445815	-0.245598	-0.541601	-0.624152	-0.489628	-0.351397	-0.853762
641371	0.620976	0.730251	0.588917	0.528221	0.479992	0.590563
646962	0.456606	0.384001	0.410355	0.290674	0.376257	0.384476
653583	0.481907	0.694765	0.678273	0.55791	0.460157	0.57549
729359	-0.746144	-0.777847	-0.519863	-0.780288	-0.767024	-0.717341
100170841	0.332663	0.206615	0.205895	0.215064	0.214187	0.235777
100379661	0.519842	0.304272	0.227295	0.515747	0.509374	0.4162
100506658	0.437827	0.471631	0.997285	0.778635	0.560245	0.440237
111240474	0.522184	0.749581	0.730833	0.464688	0.485748	0.591498
113523636	0.966836	0.534231	0.44342	0.624913	0.683111	0.434857

## Sheet: Table S3
KEGG z-score across five lot and merged by using all genes
GeneSet	A	B	C	D	E	Merge
2-Oxocarboxylic acid metabolism	0.184	0.1	-0.419	-1.517	-0.456	0.859
ABC transporters	0.076	-1.5	3.123	-2.421	0.708	-0.038
Acute myeloid leukemia	0.51	-1.759	1.998	0.073	-1.431	-1.141
Adherens junction	-1.165	-0.374	-0.818	0.302	-1.502	-1.582
Adipocytokine signaling pathway	-1.319	-0.756	-0.13	1.693	-0.857	-0.238
Adrenergic signaling in cardiomyocytes	-0.382	-0.667	2.649	3.161	0.429	1.508
African trypanosomiasis	-1.043	0.448	-1.6	0.357	-2.15	-0.195
AGE-RAGE signaling pathway in diabetic complications	-1.133	-2.675	-0.338	0.055	-0.985	-2.205
Alanine, aspartate and glutamate metabolism	-1.041	-0.617	-0.723	-0.036	0.82	0.231
Alcoholism	1.04	1.439	1.58	1.222	0.897	2.21
Aldosterone synthesis and secretion	-0.938	-1.99	0.519	4.39	-1.052	0.266
Aldosterone-regulated sodium reabsorption	-0.308	0.616	2.184	3.486	-1.155	0.185
Allograft rejection	1.519	0.385	1.446	-1.3	-0.458	0.689
alpha-Linolenic acid metabolism	0.475	1.198	1.506	-0.423	1.361	1.593
Alzheimer's disease	1.049	-0.431	0.905	0.981	0.779	0.272
Amino sugar and nucleotide sugar metabolism	-1.168	-0.9	-1.172	0.088	-0.662	0.084
Aminoacyl-tRNA biosynthesis	1.838	-0.939	1.04	-0.66	-0.524	-1.278
Amoebiasis	-2.573	-1.666	0.661	0.874	-2.198	-1.862
Amphetamine addiction	-1.467	-1.141	0.162	2.186	1.726	-0.096
AMPK signaling pathway	-0.23	-0.624	2.648	1.54	-1.838	-0.011
Amyotrophic lateral sclerosis (ALS)	-1.114	-1.2	1.667	0.826	1.366	1.116
Antifolate resistance	0.607	-1.512	1.951	0.16	-2.166	1.085
Antigen processing and presentation	0.144	-0.082	2.657	0.952	-0.686	0.46
Apelin signaling pathway	-0.207	-2.498	1.266	1.003	-0.697	0.003
Apoptosis	-0.018	-1.758	0.135	-0.089	-0.551	0.09
Apoptosis - multiple species	-0.276	-0.683	-1.218	-0.219	-0.389	-1.119
Arachidonic acid metabolism	0.064	0.373	1.347	0.902	0.812	1.071
Arginine and proline metabolism	0.827	-1.619	0.49	0.672	0.135	0.188
Arginine biosynthesis	0.086	-0.379	-2.181	-0.899	0.312	1.051
Arrhythmogenic right ventricular cardiomyopathy (ARVC)	-1.206	1.828	-1.418	-0.854	-1.77	-2.929
Ascorbate and aldarate metabolism	-1.575	-0.068	-0.947	-1.919	-0.704	-1.397
Asthma	0.54	1.982	-0.203	0.159	1.04	-0.657
Autoimmune thyroid disease	1.519	0.925	1.503	-1.521	-0.202	0.689
Autophagy - animal	2.234	0.099	2.124	0.778	0.766	0.821
Autophagy - other	0.691	0.952	2.452	0.179	0.315	0.804
Axon guidance	2	2.383	-0.082	1.363	-0.045	0.125
B cell receptor signaling pathway	1.038	-2.233	0.961	-0.294	-0.605	-0.02
Bacterial invasion of epithelial cells	-0.521	0.348	-0.577	-1.159	-2.172	-4.404
Basal cell carcinoma	0.851	3.291	-0.898	1.567	1.156	3.177
Basal transcription factors	-0.163	-2.292	-2.429	-1.83	-1.445	-1.327
Base excision repair	-1.347	-2.908	-2.015	0.257	-0.964	-0.691
beta-Alanine metabolism	1.028	-0.873	-0.361	-0.654	0.291	1.065
Bile secretion	0.704	-0.304	1.288	2.416	0.763	-0.182
Biosynthesis of amino acids	1.382	-0.451	1.633	-0.524	0.249	0.151
Biosynthesis of unsaturated fatty acids	1.22	0.197	0.124	0.584	1.268	1.985
Biotin metabolism	0.361	-0.41	0.881	1.613	0.144	-0.161
Bladder cancer	2.035	-0.294	-0.223	-0.49	-0.192	-2.251
Breast cancer	0.535	1.78	0.18	0.337	1.028	0.371
Butanoate metabolism	1.291	1.734	1.787	0.409	-0.856	2.22
Caffeine metabolism	0.211	1.072	0.646	1.204	0.667	1.049
Calcium signaling pathway	-0.178	-0.592	0.314	1.547	0.408	1.072
cAMP signaling pathway	0.169	-1.639	1.832	2.355	0.224	0.926
Carbohydrate digestion and absorption	-0.902	-0.879	1.942	1.662	-0.893	-0.222
Carbon metabolism	0.502	-0.08	0.748	-0.675	-0.104	-0.402
Cardiac muscle contraction	-0.089	1.159	2.989	0.953	1.248	1.998
Cell adhesion molecules (CAMs)	1.382	0.563	1.968	-1.74	-0.935	0.783
Cell cycle	-2.506	-1.972	-2.301	-2.965	-2.108	-6.293
Cellular senescence	-1.067	-5.149	-0.398	-1.35	-0.343	-3.204
Central carbon metabolism in cancer	2.724	-1.702	1.955	0.313	-0.135	-1.016
cGMP-PKG signaling pathway	-1.353	-0.92	2.486	2.576	0.221	1.762
Chagas disease (American trypanosomiasis)	-0.597	-2.427	0.011	-0.906	-0.635	0.061
Chemical carcinogenesis	1.339	2.062	1.381	2.276	1.154	1.821
Chemokine signaling pathway	0.825	-0.987	0.809	0.55	-0.524	-0.066
Choline metabolism in cancer	1.704	0.439	0.109	0.779	0.144	-1.127
Cholinergic synapse	-0.534	-0.351	1.203	2.442	-0.095	1.035
Chronic myeloid leukemia	0.783	-2.197	2.945	-1.304	-0.218	-0.563
Circadian entrainment	-0.465	-2.128	-0.027	1.903	0.138	1.258
Circadian rhythm	0.54	-1.143	-0.618	1.18	-0.464	0.412
Citrate cycle (TCA cycle)	-0.353	-0.578	-0.47	-0.681	-1.159	-0.614
Cocaine addiction	-0.092	-1.109	0.939	1.479	0.966	0.774
Collecting duct acid secretion	1.287	0.74	-0.705	-0.38	0.289	-0.316
Colorectal cancer	1.079	-0.879	0.998	0.811	-0.149	-0.92
Complement and coagulation cascades	-2.371	-0.587	2.32	0.174	-2.095	-1.441
Cysteine and methionine metabolism	-1.235	-0.799	-0.657	-0.668	-2.588	-0.43
Cytokine-cytokine receptor interaction	-0.125	0.339	0.947	-1.947	1.765	2.101
Cytosolic DNA-sensing pathway	0.232	-0.812	0.933	0.192	-0.013	1.026
D-Arginine and D-ornithine metabolism	-0.685	0	0	0	-0.164	-0.398
D-Glutamine and D-glutamate metabolism	0.974	-2.07	-1.48	0.433	2.02	1.442
Dilated cardiomyopathy (DCM)	-0.267	1.926	-0.555	-1.754	-2.312	-2.756
DNA replication	-0.683	-1.539	-3.309	-1.854	-1.581	-3.332
Dopaminergic synapse	-0.613	-2.065	0.185	2.615	0.93	0.892
Drug metabolism - cytochrome P450	0.989	0.52	1.486	1.632	1.119	1.808
Drug metabolism - other enzymes	0.533	-0.844	-1.101	0.018	-0.162	-1.001
ECM-receptor interaction	-2.23	0.168	0.641	-1.537	-2.748	-2.973
EGFR tyrosine kinase inhibitor resistance	0.739	-0.459	-0.444	0.354	-0.397	-0.891
Endocrine and other factor-regulated calcium reabsorption	-1.37	-0.507	-0.983	2.963	-0.988	-1.447
Endocrine resistance	2.318	-0.359	1.126	1.072	0.486	-1.459
Endocytosis	2.139	-1.198	-0.505	-0.611	0.902	-1.831
Endometrial cancer	1.635	0.224	1.211	0.76	-0.189	-0.539
Epithelial cell signaling in Helicobacter pylori infection	1.027	-2.142	-1.432	0.737	0.015	0.092
Epstein-Barr virus infection	0.323	-3.372	0.53	-0.919	-0.792	-2.283
ErbB signaling pathway	0.722	-0.681	0.69	1.156	0.404	-0.135
Estrogen signaling pathway	0.711	-0.801	2.05	2.05	-0.469	-0.458
Ether lipid metabolism	0.992	1.186	0.158	-0.899	1.701	-0.14
Fanconi anemia pathway	-2.301	-0.923	-3.318	-1.209	-1.224	-3.026
Fat digestion and absorption	0.24	1.202	1.002	1.323	0.952	0.687
Fatty acid biosynthesis	-1.475	1.875	2.023	2.294	-0.565	0.162
Fatty acid degradation	0.338	3.029	0.536	0.69	-1.024	0.53
Fatty acid elongation	-0.165	-1.003	-0.712	0.261	0.544	0.234
Fatty acid metabolism	0.3	1.681	1.52	1.497	0.092	2.009
Fc epsilon RI signaling pathway	1.321	-1.242	-0.143	1.34	1.27	-0.489
Fc gamma R-mediated phagocytosis	1.506	-0.712	1.063	-0.891	-1.354	-1.422
Ferroptosis	-0.012	3.013	1.977	1.387	1.207	2.731
Fluid shear stress and atherosclerosis	-0.07	-2.106	0.785	1.278	0.205	-0.413
Focal adhesion	-1.791	-1.09	-0.709	-0.007	-1.902	-4.463
Folate biosynthesis	-2.143	0.38	-1.255	0.763	-0.147	-0.533
FoxO signaling pathway	1.135	-0.879	-0.263	-0.324	0.931	-0.849
Fructose and mannose metabolism	1.173	-1.373	1.76	0.977	-0.681	0.552
GABAergic synapse	0.665	-0.279	0.478	1.819	-1.167	1.787
Galactose metabolism	0.374	-0.56	-0.927	-0.359	-0.603	-0.475
Gap junction	0.887	-0.103	-0.699	1.659	-1.531	-0.793
Gastric acid secretion	-0.446	-1.193	0.482	2.702	0.357	-0.349
Glioma	1.386	0.065	0.171	-0.519	0.566	-1.261
Glucagon signaling pathway	-0.903	-1.275	3.12	1.735	0.343	-0.942
Glutamatergic synapse	0.709	-0.53	-0.321	1.565	-1.075	0.575
Glutathione metabolism	-0.032	-1.312	1.096	0.479	0.524	0.522
Glycerolipid metabolism	0.629	0.642	-0.748	0.063	0.381	1.201
Glycerophospholipid metabolism	0.615	1.031	-0.968	-0.021	0.612	0.441
Glycine, serine and threonine metabolism	-1.828	-0.277	0.354	0.275	-0.723	-0.928
Glycolysis / Gluconeogenesis	1.466	0.285	1.017	-0.764	-0.701	-0.85
Glycosaminoglycan biosynthesis - chondroitin sulfate / dermatan sulfate	-0.114	0.397	-0.926	-0.787	-0.527	-0.089
Glycosaminoglycan biosynthesis - heparan sulfate / heparin	-1.306	0.491	-2.038	0.448	-0.902	-0.893
Glycosaminoglycan biosynthesis - keratan sulfate	0.141	0.148	0.02	-0.097	0.01	-0.418
Glycosaminoglycan degradation	0.308	1.434	2.203	0.684	1.482	1.323
Glycosphingolipid biosynthesis - ganglio series	-0.632	-0.099	1.427	-0.657	0.178	-0.16
Glycosphingolipid biosynthesis - globo and isoglobo series	0.372	-0.814	0.174	0.596	2.113	1.337
Glycosphingolipid biosynthesis - lacto and neolacto series	0.996	1.003	1.324	1.206	1.535	1.205
Glycosylphosphatidylinositol (GPI)-anchor biosynthesis	1.395	-0.83	0.071	0.63	-2.055	-0.68
Glyoxylate and dicarboxylate metabolism	-0.277	1.664	1.377	0.062	0.048	1.218
GnRH signaling pathway	1.514	-2.148	0.329	2.413	0.22	-0.198
Graft-versus-host disease	1.196	0.054	1.58	-1.526	-0.749	0.236
Hedgehog signaling pathway	1.719	-0.592	-0.59	1.094	0.69	0.326
Hematopoietic cell lineage	-0.281	-0.012	0.261	-1.536	-1.392	-2.53
Hepatitis B	-0.66	-2.99	0.481	0.295	-1.559	-2.331
Hepatitis C	1.029	-0.183	-0.57	0.168	0.114	-1.417
Herpes simplex infection	-1.204	-2.544	-0.281	-0.154	-0.096	0.101
HIF-1 signaling pathway	-0.762	-1.821	-1.294	-1.733	-1.087	-2.026
Hippo signaling pathway	0.108	0.853	-2.55	0.218	-0.334	-0.305
Hippo signaling pathway - multiple species	-0.004	-1.653	-3.757	-0.432	-0.611	-0.801
Histidine metabolism	0.718	-0.093	0.416	0.865	-0.907	0.704
Homologous recombination	-3.303	-3.81	-2.704	-1.017	-0.914	-4.841
Human T-cell leukemia virus 1 infection	-1.163	-2.931	2.426	-0.296	-1.59	-3.231
Huntington's disease	0.11	0.636	1.258	0.71	2.428	1.198
Hypertrophic cardiomyopathy (HCM)	-0.827	0.874	-0.122	-2.183	-2.403	-2.586
IL-17 signaling pathway	-1.832	-1.75	0.26	0.102	-0.024	0.311
Inflammatory bowel disease (IBD)	-1.832	-1.436	-1.219	-0.325	-0.256	-0.622
Inflammatory mediator regulation of TRP channels	-0.802	-0.664	-0.806	2.267	0.18	-0.622
Influenza A	-0.455	-0.83	0.226	0.713	0.78	-0.73
Inositol phosphate metabolism	-1.896	-1.03	-0.357	-1.178	-1.215	-0.138
Insulin resistance	-0.98	-1.072	3.594	2.677	-0.967	-0.123
Insulin secretion	-2.22	-0.011	0.819	3.808	-0.719	0.063
Insulin signaling pathway	0.191	-2.699	3.223	1.586	-0.795	-2.114
Intestinal immune network for IgA production	1.804	1.033	0.008	-0.546	-0.003	1.09
Jak-STAT signaling pathway	0.1	0.022	0.654	-0.689	0.079	-0.852
Kaposi's sarcoma-associated herpesvirus infection	-0.062	-2.954	0.7	-0.825	0.016	-1.352
Legionellosis	0.733	-0.706	0.983	-0.694	-0.448	-0.248
Leishmaniasis	-2.289	-2.03	1.21	-1.711	-0.072	-1.314
Leukocyte transendothelial migration	-0.929	-0.065	-0.678	-0.969	-0.126	-1.116
Linoleic acid metabolism	0.186	0.421	1.121	1.489	2.02	2.158
Lipoic acid metabolism	2.517	0	-1.17	1.241	-1.754	-1.146
Longevity regulating pathway	0.759	-1.487	1.164	2.527	0.616	2.443
Longevity regulating pathway - multiple species	0.92	1.513	2.503	1.724	0.777	2.037
Long-term depression	0.44	0.879	0.144	1.575	-0.29	0.633
Long-term potentiation	-0.321	-0.837	-0.007	1.812	1.353	-0.361
Lysine degradation	-2.45	-2.756	0.005	-0.038	-2.56	-1.306
Lysosome	-1.109	-0.646	1.166	1.762	0.84	2.314
Malaria	-0.148	-1.18	-0.571	-1.012	-1.804	-0.271
Mannose type O-glycan biosynthesis	-0.088	0.661	-0.265	0.607	1.418	-0.678
MAPK signaling pathway	1.341	-0.562	1.373	0.406	0.324	1.819
Maturity onset diabetes of the young	-0.282	1.597	0.86	-0.461	0.234	0.97
Measles	-0.185	-2.044	1.667	-0.261	0.397	-1.627
Melanogenesis	-0.582	2.035	-0.916	1.916	-0.575	1.147
Melanoma	1.283	1.096	0.15	-1.666	0.358	-0.789
Metabolic pathways	1.056	1.35	0.803	0.943	-0.438	2.369
Metabolism of xenobiotics by cytochrome P450	1.065	1.414	1.335	2.044	1.271	1.925
MicroRNAs in cancer	-0.964	-2.312	-2.136	-0.068	0.06	-3.38
Mineral absorption	0.175	-0.051	0.47	2.142	0.933	1.907
Mismatch repair	-2.624	-0.506	-1.71	-0.988	-2.217	-1.423
Mitophagy - animal	0.333	0.004	-0.759	2.526	1.12	1.931
Morphine addiction	-0.271	-1.928	-0.655	1.68	-1.941	-0.813
mRNA surveillance pathway	-0.668	-1.854	-0.569	-0.84	0.465	-2.526
mTOR signaling pathway	2.556	0.455	-1.249	1.926	-0.016	1.17
Mucin type O-glycan biosynthesis	-1.305	0.531	-1.571	-0.545	-1.294	-1.253
Natural killer cell mediated cytotoxicity	2.165	-1.965	0.037	-1.06	-1.255	-1.774
Necroptosis	-0.52	1.492	0.766	0.451	1.986	1.983
Neomycin, kanamycin and gentamicin biosynthesis	0.25	-1.356	0.306	-0.953	-0.668	1.085
Neuroactive ligand-receptor interaction	-1.003	1.405	0.692	0.132	1.27	1.263
Neurotrophin signaling pathway	0.254	-3.218	0.716	1.082	0.821	-0.021
NF-kappa B signaling pathway	-0.513	-0.158	0.627	-0.507	-1.964	-1.347
N-Glycan biosynthesis	0.391	-0.309	-0.069	-0.456	-0.019	0.026
Nicotinate and nicotinamide metabolism	0.989	-0.385	1.14	2.905	-1.439	1.973
Nicotine addiction	-1.603	-0.031	1.168	0.433	1.373	0.014
Nitrogen metabolism	-0.387	1.502	0.977	0.638	1.497	1.531
NOD-like receptor signaling pathway	-0.79	-1.835	1.538	-0.841	-0.331	1.393
Non-alcoholic fatty liver disease (NAFLD)	0.798	-0.106	1.454	0.27	1.504	1.038
Non-homologous end-joining	-0.075	0.76	-1.366	-0.98	0.822	-0.346
Non-small cell lung cancer	0.884	-0.593	-1.54	0.164	-0.143	-2.89
Notch signaling pathway	-0.622	-1.396	1.335	0.357	0.017	0.268
Nucleotide excision repair	-1.36	-1.444	-1.041	-1.556	-1.216	-1.732
Olfactory transduction	-0.712	1.719	0.561	-0.479	2.416	1.46
One carbon pool by folate	-0.883	-0.574	1.511	0.068	-0.51	1.011
Oocyte meiosis	-1.701	-2.237	-2.438	-1.22	-0.378	-3.498
Osteoclast differentiation	-1.585	-2.669	2.229	-0.728	-0.821	0.395
Other glycan degradation	1.867	0.027	1.748	0.61	-2.331	1.125
Other types of O-glycan biosynthesis	-0.879	-0.742	-0.103	1.306	-0.203	0.823
Ovarian steroidogenesis	0.156	2.215	0.945	1.563	-0.903	-0.12
Oxidative phosphorylation	1.883	0.973	0.955	0.317	2.577	0.518
Oxytocin signaling pathway	-0.442	-0.846	-0.539	1.009	-0.74	-0.779
p53 signaling pathway	0.123	-1.543	-0.242	-0.473	-0.052	-1.863
Pancreatic cancer	-0.505	-1.611	0.002	0.258	-0.705	-2.617
Pancreatic secretion	-0.309	0.068	1.165	2.813	-1.263	-1.003
Pantothenate and CoA biosynthesis	0.688	-0.056	1.271	-0.214	0.69	2.106
Parkinson's disease	1.295	0.83	0.738	0.839	2.328	1.671
Pathogenic Escherichia coli infection	-0.219	-0.334	-1.275	-0.772	-0.283	-1.635
Pathways in cancer	-1.007	-1.017	-0.879	0.377	-2.028	-1.633
Pentose and glucuronate interconversions	-1.251	-0.06	-0.515	-0.885	-0.371	-0.451
Pentose phosphate pathway	1.498	-0.825	-0.256	-1.342	-0.099	-2.829
Peroxisome	0.283	2.181	0.125	0.097	-0.029	0.556
Pertussis	-0.675	-2.823	-0.517	-0.263	-0.452	-0.535
Phagosome	0.209	-1.37	0.577	-0.588	-0.583	-0.908
Phenylalanine metabolism	-0.086	0.972	-1.355	0.728	-0.489	0.483
Phenylalanine, tyrosine and tryptophan biosynthesis	-1.23	0.173	0	-0.427	-0.152	0.455
Phosphatidylinositol signaling system	-1.914	-2.167	-1.141	-1.472	-0.878	-1.331
Phospholipase D signaling pathway	1.735	0.277	-0.66	1.879	-0.464	-0.918
Phosphonate and phosphinate metabolism	-0.304	-0.262	-1.406	0.109	2.391	1.12
Phototransduction	0.864	-1.533	0.771	0.045	0.899	1.319
PI3K-Akt signaling pathway	-1.559	-1.268	1.194	-0.701	-1.64	-3.177
Platelet activation	-1.114	-0.757	-1.129	1.708	1.207	-2.362
Platinum drug resistance	-0.82	-0.166	1.402	1.795	0.955	0.037
Porphyrin and chlorophyll metabolism	-1.275	0.218	-1.004	-1.309	-0.819	-1.507
PPAR signaling pathway	-0.894	3.558	1.362	0.833	-1.713	0.477
Primary bile acid biosynthesis	-0.397	1.391	0.386	-1.156	-0.119	0.933
Primary immunodeficiency	0.906	0.6	1.088	-0.647	-0.966	-0.069
Prion diseases	0.472	0.629	0.288	-0.454	1.065	1.342
Progesterone-mediated oocyte maturation	-0.835	-1.075	0.017	-0.336	0.236	-2.602
Prolactin signaling pathway	0.302	-1.872	-0.731	1.812	0.627	-1.521
Propanoate metabolism	-0.605	-0.222	0.781	0.596	-0.233	0.75
Prostate cancer	0.55	-0.783	1.027	0.065	-0.14	-0.461
Proteasome	-0.808	-1.639	-1.97	-2.158	-1.865	-2.28
Protein digestion and absorption	-1.968	0.968	2.629	1.756	-0.847	0.191
Protein export	0.606	-0.322	-0.266	0.828	-0.085	0.448
Protein processing in endoplasmic reticulum	2.402	0.108	2.746	2.058	-1.079	-0.176
Proteoglycans in cancer	-0.825	1.02	-2.142	1.69	-0.412	-1.52
Proximal tubule bicarbonate reclamation	-1.107	-1.033	-0.179	0.597	-0.358	-0.114
Purine metabolism	-0.377	-2.059	-0.675	1.452	-2.171	-2.578
Pyrimidine metabolism	0.176	-2.499	-0.665	0.218	-2.432	-3.169
Pyruvate metabolism	-1.522	-0.06	0.778	0.944	-0.432	0.322
Rap1 signaling pathway	-1.065	0.232	-0.524	1.333	-0.255	-2.573
Ras signaling pathway	-0.968	-1.635	1.357	0.308	-0.069	-0.325
Regulation of actin cytoskeleton	-0.215	1.042	-0.602	-1.432	-1.123	-3.026
Regulation of lipolysis in adipocytes	1.151	-0.172	1.181	-0.145	-0.481	-0.545
Renal cell carcinoma	0.015	-0.7	-0.596	-0.468	-0.37	-1.12
Renin secretion	-1.294	-1.712	-0.057	1.414	-0.481	-0.422
Renin-angiotensin system	2.026	-1.572	0.563	-0.532	-1.098	-0.073
Retinol metabolism	-0.239	1.989	0.17	-0.733	0.228	0.624
Retrograde endocannabinoid signaling	0.091	-0.79	0.417	1.67	0.545	1.239
Rheumatoid arthritis	0.382	0.739	-0.888	-1.635	0.557	-0.462
Riboflavin metabolism	0.972	-0.358	0.17	-0.674	0.627	0.368
Ribosome	2.394	-1.629	1.105	-3.66	0.943	-1.012
Ribosome biogenesis in eukaryotes	-2.352	-0.498	-2.458	-0.37	-1.425	-2.748
RIG-I-like receptor signaling pathway	0.895	-1.639	0.117	1.148	-0.195	0.261
RNA degradation	0.002	0.027	0.886	0.679	0.517	-1.621
RNA polymerase	0.928	-0.491	-0.219	-1.469	0.277	-0.942
RNA transport	0.451	-2.992	-1.461	-2.426	-1.242	-4.12
Salivary secretion	-1.716	-0.015	2.047	2.991	-1.052	-0.523
Salmonella infection	-0.178	-0.175	0.196	-2.437	-0.268	-0.823
Selenocompound metabolism	2.011	0.775	0.208	0.269	0.128	1.144
Serotonergic synapse	-0.316	-0.605	-0.613	2.859	-1.18	0.031
Shigellosis	0.129	-1.157	-1.6	-0.245	-0.52	-1.645
Signaling pathways regulating pluripotency of stem cells	1.388	0.846	-0.052	-0.043	1.099	0.034
Small cell lung cancer	-0.716	-2.048	0.929	0.091	-0.257	-1.69
SNARE interactions in vesicular transport	0.122	-1.44	0.065	-0.63	-0.102	-1.052
Sphingolipid metabolism	1.398	1.229	1.18	0.154	-1.14	-0.409
Sphingolipid signaling pathway	0.651	-0.629	-0.202	0.154	1.125	-1.099
Spliceosome	0.126	-0.856	0.763	-1.41	-0.29	-1.588
Staphylococcus aureus infection	-1.047	-0.428	0.923	0.433	-0.422	-0.587
Starch and sucrose metabolism	-0.899	-1.634	0.258	-0.545	-0.423	-1.456
Steroid biosynthesis	1.443	5.26	3.267	3.501	3.102	5.451
Steroid hormone biosynthesis	-0.471	1.765	1.003	-0.878	1.021	1.765
Sulfur metabolism	0.769	0.165	0.064	0.286	-0.027	0.25
Sulfur relay system	-0.038	0.431	-0.799	-0.015	-0.272	-0.422
Synaptic vesicle cycle	1.61	0.737	-0.363	0.156	1.346	0.528
Synthesis and degradation of ketone bodies	1.08	1.539	1.755	2.14	0.356	2.969
Systemic lupus erythematosus	0.383	3.767	1.167	0.056	0.737	1.822
T cell receptor signaling pathway	0.856	-1.33	1.456	-1.065	-0.708	-0.75
Taste transduction	-1.683	1.986	0.569	-0.398	-0.172	-0.091
Taurine and hypotaurine metabolism	0.78	-0.534	1.299	-0.712	-0.23	0.952
Terpenoid backbone biosynthesis	0.815	3.488	1.776	1.788	1.249	3.82
TGF-beta signaling pathway	-0.842	-1.672	0.291	-2.378	0.836	-0.354
Th1 and Th2 cell differentiation	-1.742	-0.824	1.32	0.477	0.859	-0.1
Th17 cell differentiation	-0.892	-1.529	0.685	0.422	0.174	0.145
Thiamine metabolism	-0.269	-0.424	-1.189	-0.393	-0.078	1.47
Thyroid cancer	-0.34	1.475	1.09	0.301	1.021	0.581
Thyroid hormone signaling pathway	-0.066	-1.31	2.22	1.127	-1.07	-1.253
Thyroid hormone synthesis	-1.74	0.999	1.801	3.223	-1.375	-0.109
Tight junction	-0.084	-0.461	-2.261	-1.01	0.53	-2.455
TNF signaling pathway	-1.963	-2.277	0.671	-0.561	-0.205	-0.466
Toll-like receptor signaling pathway	-0.642	-1.124	1.278	-0.302	-0.023	0.885
Toxoplasmosis	-2.973	-0.284	1.979	-0.364	0.221	-0.225
Transcriptional misregulation in cancer	-0.53	0.649	3.703	-0.239	0.378	0.444
Tryptophan metabolism	0.641	2.025	0.592	1.354	-0.389	2.674
Tuberculosis	-0.905	-1.405	-0.526	-0.507	0.944	-0.907
Type I diabetes mellitus	1.233	0.122	1.011	-1.005	0.284	0.486
Type II diabetes mellitus	0.122	-0.231	0.63	0.446	-0.825	-0.194
Tyrosine metabolism	1.936	1.807	0.006	1.446	-0.366	1.565
Ubiquinone and other terpenoid-quinone biosynthesis	0.213	0.569	-0.377	-1.768	-0.735	-0.172
Ubiquitin mediated proteolysis	-0.11	-1.442	-1.252	0.607	-1.108	-3.345
Valine, leucine and isoleucine biosynthesis	-0.485	-1.214	0.779	-0.926	-1.226	-1.911
Valine, leucine and isoleucine degradation	0.603	1.099	1.906	0.769	-0.897	1.64
Vascular smooth muscle contraction	-0.612	-0.626	1.423	1.783	-0.931	-0.464
Vasopressin-regulated water reabsorption	-0.232	-1.168	1.708	-0.098	-2.608	-1.809
VEGF signaling pathway	-0.106	-0.417	1.917	1.102	0.85	-0.907
Vibrio cholerae infection	1.364	1.561	-2.467	0.462	-0.464	-1.922
Viral carcinogenesis	-0.392	-1.019	-1.216	-0.199	-1.509	-2.277
Viral myocarditis	0.599	0.008	0.273	-1.2	-0.632	-2.679
Vitamin B6 metabolism	1.488	0.64	0.806	1.167	0.958	1.898
Vitamin digestion and absorption	0	-0.999	-0.593	-0.415	-1.526	-0.565
Wnt signaling pathway	-0.704	1.177	-0.726	0.88	0.399	0.822

## Sheet: Table S4
KEGG z-score across five lot and merged by using common 816 genes
GeneSet	A	B	C	D	E	Merge
Glycolysis / Gluconeogenesis	0.6	0.321	0.681	1.194	0.412	0.434
Citrate cycle (TCA cycle)	0.819	1.13	0.5	0.344	1.005	1.142
Pentose phosphate pathway	-0.392	-1.014	-1.343	0.602	-0.98	-1.881
Pentose and glucuronate interconversions	-0.744	-1.027	-2.611	-0.412	-0.769	-1.406
Fructose and mannose metabolism	0.077	-0.046	0.381	0.966	0.754	0.571
Galactose metabolism	0.157	-1.1	-1.147	-0.465	-0.06	-0.463
Ascorbate and aldarate metabolism	-0.519	-0.238	-1.444	-1.1	-0.417	-0.612
Fatty acid biosynthesis	1.112	3.671	0.742	0.295	-0.324	1.232
Fatty acid elongation	0.656	0.815	0.775	0.403	0.622	0.936
Fatty acid degradation	1.115	3.55	1.173	1.003	0.3	1.839
Synthesis and degradation of ketone bodies	1.483	1.861	1.375	1.725	1.069	2.082
Steroid biosynthesis	2.193	4.534	2.17	3.438	2.937	4.365
Primary bile acid biosynthesis	0.709	0.72	0.566	0.712	0.927	1.323
Ubiquinone and other terpenoid-quinone biosynthesis	0	0	0	0	0	0
Steroid hormone biosynthesis	1.28	1.308	0.303	0.052	1.098	1.882
Oxidative phosphorylation	0.826	0.824	0.279	1.049	0.871	0.952
Arginine biosynthesis	-0.871	0.148	-1.954	-1.17	-0.795	-0.079
Purine metabolism	0.425	0.462	-1.279	-0.684	-0.027	-0.942
Caffeine metabolism	0	0	0	0	0	0
Pyrimidine metabolism	0.149	-0.509	0	-0.063	-0.351	-0.875
Alanine, aspartate and glutamate metabolism	-1.138	-0.273	-2.884	-1.58	-0.795	-0.742
Glycine, serine and threonine metabolism	-1.214	-1.127	0.026	-0.6	-0.95	-1.804
Cysteine and methionine metabolism	-1.013	-1.446	-0.497	0.081	-1.596	-0.974
Valine, leucine and isoleucine degradation	1.508	2.586	1.483	1.401	0.999	1.875
Valine, leucine and isoleucine biosynthesis	-1.03	-1.539	-0.948	-1.163	-1.652	-1.781
Lysine degradation	0.756	-1.142	-0.119	-0.241	-0.555	-0.727
Arginine and proline metabolism	-0.365	-0.163	0.057	-0.462	-0.26	-0.04
Histidine metabolism	0.91	0.13	0.188	0.124	0.213	0.52
Tyrosine metabolism	0.854	0	0.788	-0.963	0	0.436
Phenylalanine metabolism	0	0	0	0	0	0
Tryptophan metabolism	1.441	1.62	1.317	0.892	-0.004	1.409
Phenylalanine, tyrosine and tryptophan biosynthesis	0	0	0	0	0	0
beta-Alanine metabolism	-0.799	-0.152	-0.41	-0.281	-0.072	-0.082
Taurine and hypotaurine metabolism	0.478	0.798	0.68	0.859	1.265	1.165
Phosphonate and phosphinate metabolism	0	0	0	0	0	0
Selenocompound metabolism	0.117	0.396	0.122	0.184	0.237	0.393
D-Glutamine and D-glutamate metabolism	0	0	0	0	0	0
D-Arginine and D-ornithine metabolism	0	0	0	0	0	0
Glutathione metabolism	0.592	-0.178	1.183	0.577	0.627	0.714
Starch and sucrose metabolism	0.511	-1.118	-1.095	-0.176	0.161	-0.133
N-Glycan biosynthesis	-0.438	-0.324	-0.449	-0.595	-0.328	-0.596
Other glycan degradation	0.174	-1.03	0.645	-0.239	1.737	0.531
Mucin type O-glycan biosynthesis	-0.266	0.212	-0.01	-0.287	0.347	-0.203
Other types of O-glycan biosynthesis	-0.438	-0.324	-0.449	-0.595	-0.328	-0.596
Mannose type O-glycan biosynthesis	-0.438	-0.324	-0.449	-0.595	-0.328	-0.596
Amino sugar and nucleotide sugar metabolism	0.324	-1.183	0.036	0.609	0.042	0.105
Neomycin, kanamycin and gentamicin biosynthesis	0.239	-0.046	0.235	0.513	0.582	0.613
Glycosaminoglycan degradation	0.659	-0.451	2.178	0.956	0.589	1.4
Glycosaminoglycan biosynthesis - chondroitin sulfate / dermatan sulfate	0.067	0.429	0.227	0.392	0.451	0.438
Glycosaminoglycan biosynthesis - keratan sulfate	-0.438	-0.324	-0.449	-0.595	-0.328	-0.596
Glycosaminoglycan biosynthesis - heparan sulfate / heparin	0	0	0	0	0	0
Glycerolipid metabolism	0.569	0.587	0.611	0.245	1.409	0.587
Inositol phosphate metabolism	0	0	0	0	0	0
Glycosylphosphatidylinositol (GPI)-anchor biosynthesis	0	0	0	0	0	0
Glycerophospholipid metabolism	0.189	0.218	0.638	-1.109	1.093	0.508
Ether lipid metabolism	0.828	0.205	0.933	-2.416	0.069	-0.171
Arachidonic acid metabolism	1.907	1.055	1.38	1.162	1.021	2.199
Linoleic acid metabolism	1.951	0.832	1.203	1.066	0.795	2.095
alpha-Linolenic acid metabolism	0.306	2.333	2.062	1.32	1.33	1.961
Sphingolipid metabolism	0.166	0.343	-0.479	-0.228	0	-0.19
Glycosphingolipid biosynthesis - lacto and neolacto series	0.557	0.536	0.309	0.396	1.04	0.967
Glycosphingolipid biosynthesis - globo and isoglobo series	1.209	-0.444	2.113	1.503	1.82	1.569
Glycosphingolipid biosynthesis - ganglio series	0	-1.711	2.099	0.992	0	0.25
Pyruvate metabolism	1.602	1.045	1.058	1.527	0.678	1.351
Glyoxylate and dicarboxylate metabolism	0.583	1.234	0.781	1.127	-0.354	0.694
Propanoate metabolism	1.439	1.144	1.118	1.783	0.667	1.268
Butanoate metabolism	1.305	2.921	1.586	1.434	1.069	1.966
One carbon pool by folate	-0.371	0.233	0.108	0.605	-0.299	-0.18
Thiamine metabolism	0.701	1.807	-0.038	0.643	1.078	0.699
Riboflavin metabolism	0	0	0	0	0	0
Vitamin B6 metabolism	0.726	0.016	0.06	0.221	0.607	0.58
Nicotinate and nicotinamide metabolism	0.439	0.718	0.537	0.705	1.614	0.975
Pantothenate and CoA biosynthesis	0.807	1.8	0.903	0.721	0.672	2.509
Biotin metabolism	0	0	0	0	0	0
Lipoic acid metabolism	0	0	0	0	0	0
Folate biosynthesis	0.197	0.545	-0.021	0.353	0.12	0.585
Retinol metabolism	-2.714	-0.033	-2.409	-3.312	-1.083	-0.204
Porphyrin and chlorophyll metabolism	-1.649	-0.284	-1.38	-1.381	-0.852	-1.461
Terpenoid backbone biosynthesis	1.692	3.666	2.396	3.17	1.698	3.342
Nitrogen metabolism	-0.245	0	0.449	-1.178	-0.12	0.651
Sulfur metabolism	0	0	0	0	0	0
Aminoacyl-tRNA biosynthesis	-0.655	-0.493	0.274	-4.939	-1.68	-0.456
Metabolism of xenobiotics by cytochrome P450	0.929	0.746	-0.23	0.189	1.117	1.373
Drug metabolism - cytochrome P450	0.75	0.164	-0.673	0.009	0.574	0.827
Drug metabolism - other enzymes	-0.029	-0.329	-1.561	-0.749	-0.49	-0.608
Biosynthesis of unsaturated fatty acids	0.557	2.633	1.519	1.648	1.398	2.373
Metabolic pathways	1.439	3.988	2.027	1.696	1.886	3.674
Carbon metabolism	0.894	0.529	-0.411	1.317	-0.496	0.567
2-Oxocarboxylic acid metabolism	0.848	0.876	-1.3	0.57	1.005	1.261
Fatty acid metabolism	1.111	4.074	1.909	1.749	0.758	2.659
Biosynthesis of amino acids	0.298	0.533	-0.886	0.32	-0.811	0.52
EGFR tyrosine kinase inhibitor resistance	-0.593	1.785	-2.171	0.996	0.59	1.263
Endocrine resistance	-1.742	-0.629	-1.562	-0.57	-0.491	-1.412
Antifolate resistance	0.973	-0.023	0.927	0.726	-2.145	0.969
Platinum drug resistance	-2.035	-1.032	-0.648	-0.445	0.319	-0.387
ABC transporters	0.213	-1.188	1.216	0.271	1.537	0.904
Ribosome biogenesis in eukaryotes	-0.739	-0.973	-1.551	-1.246	-0.695	-2.164
Ribosome	0.417	-1.381	0.829	-0.849	-0.243	-0.721
RNA transport	-0.068	-1.058	-0.82	-0.313	-1.601	-1.741
mRNA surveillance pathway	-0.566	-0.985	1.432	-0.547	-1.144	-1.22
RNA degradation	-0.95	-0.736	-0.943	-1.401	-1.114	-1.797
RNA polymerase	0	0	0	0	0	0
Basal transcription factors	0	0	0	0	0	0
DNA replication	-0.796	-0.603	-3.381	-2.251	-1.847	-2.972
Spliceosome	-1.346	-1.409	0.726	-1.945	-0.762	-2.459
Proteasome	0	-0.22	0	0.721	-0.58	-0.895
Protein export	0	0	0	0	0	0
PPAR signaling pathway	0.704	2.02	0.28	0.489	0.308	0.542
Base excision repair	-2.398	-1.048	-1.926	-0.804	-0.615	-1.999
Nucleotide excision repair	-0.131	0.549	-1.988	-0.987	-0.698	-1.321
Mismatch repair	-0.443	0.265	-2.929	-1.391	-0.915	-1.653
Homologous recombination	0.974	1.692	-2.309	0	-0.193	-0.471
Non-homologous end-joining	0	0	0	0	0	0
Fanconi anemia pathway	0.974	1.692	-2.309	0	-0.193	-0.471
MAPK signaling pathway	0.98	1.256	0.56	2.08	2.667	2.548
ErbB signaling pathway	-1.204	-0.538	-2.757	0.859	0.068	0.899
Ras signaling pathway	0.951	1.674	0.41	0.089	-0.087	0.756
Rap1 signaling pathway	0.368	0.839	-0.032	-1.37	-0.438	-0.42
Calcium signaling pathway	0.015	1.123	0.989	1.8	1.74	1.684
cGMP-PKG signaling pathway	-0.096	0.142	-1.064	-0.319	0.773	-0.958
cAMP signaling pathway	-0.574	0.57	-0.344	-0.424	-0.677	-0.3
Cytokine-cytokine receptor interaction	0.35	0.616	-0.147	0.37	0.746	1.921
Chemokine signaling pathway	-1.61	0.122	-0.149	-0.234	-1.143	0.406
NF-kappa B signaling pathway	-2.064	0.387	-0.52	0.562	-1.78	-0.157
HIF-1 signaling pathway	-2.673	-0.209	-2.722	-1.197	-1.675	-1.584
FoxO signaling pathway	-0.287	0.32	-0.42	-0.317	-0.704	-0.063
Phosphatidylinositol signaling system	0.554	0	0.248	0.539	-0.767	0.728
Sphingolipid signaling pathway	-0.6	0.086	-2.02	-0.913	-0.663	-1.117
Phospholipase D signaling pathway	0.873	0.6	-0.841	-0.206	-0.347	-0.194
Neuroactive ligand-receptor interaction	0.967	0.901	1.262	1.67	1.297	1.738
Cell cycle	-1.901	-1.743	-2.943	-2.998	-2.706	-3.924
Oocyte meiosis	-2.075	-1.37	-1.727	-2.019	-2.258	-2.461
p53 signaling pathway	0.344	-0.837	0.492	-0.371	0.127	-0.003
Ubiquitin mediated proteolysis	-1.216	-0.786	-0.465	-0.922	-1.357	-1.611
Sulfur relay system	0	0	0	0	0	0
SNARE interactions in vesicular transport	0	0	0	0	0	0
Autophagy - other	0.632	0.775	0.474	0.959	0.533	1.053
Mitophagy - animal	-0.999	0.669	-0.522	0.614	0.076	0.686
Autophagy - animal	-0.443	-0.238	-0.887	0.372	-0.413	0.842
Protein processing in endoplasmic reticulum	1.186	0.324	1.564	1.643	2.746	1.145
Lysosome	0.028	0.029	0.885	1.019	-1.999	1.663
Endocytosis	0.032	-0.679	-1.374	0.042	-0.228	-0.208
Phagosome	0.576	-0.283	-0.225	-0.104	1.198	-0.132
Peroxisome	1.25	3.166	1.352	0.435	0.66	1.674
mTOR signaling pathway	0.936	1.219	0.363	1.007	1.85	1.615
PI3K-Akt signaling pathway	-1.111	-0.269	-1.526	-1.147	-2.049	-2.811
AMPK signaling pathway	-0.027	-0.054	0.801	0.163	-0.42	0.293
Apoptosis	-1.051	-0.407	-1.073	0.471	-0.241	0.596
Longevity regulating pathway	0.413	0.66	0.59	0.672	0.711	1.284
Longevity regulating pathway - multiple species	0.249	0.257	0.412	0.58	0.62	1.095
Apoptosis - multiple species	-0.226	-0.08	-0.481	-0.41	-0.161	-0.322
Ferroptosis	1.644	1.474	0.658	1.535	1.654	2.099
Necroptosis	-2.717	0.576	0.186	-0.063	0.219	1.135
Cellular senescence	-1.496	-1.354	-1.13	-2.088	-1.896	-2.511
Cardiac muscle contraction	-0.019	-0.337	0.553	-0.84	-0.543	-0.824
Adrenergic signaling in cardiomyocytes	0.531	0.217	0.638	0.806	0.599	0.175
Vascular smooth muscle contraction	0.14	0.733	-0.144	-0.312	0.81	0.524
Wnt signaling pathway	0.666	0.95	0.377	0.394	1.083	0.908
Notch signaling pathway	0.301	0.636	0	0.426	0	0.778
Hedgehog signaling pathway	0.366	-0.358	0	-0.334	0.349	-0.103
TGF-beta signaling pathway	0.206	0.521	0.325	-0.121	0.37	0.125
Axon guidance	-0.35	0.098	-0.892	-1.369	-0.694	-1.253
VEGF signaling pathway	0.243	0.602	0.316	0.402	0.52	0.754
Apelin signaling pathway	-1.932	-1.091	-1.827	-1.54	-0.981	-2.055
Osteoclast differentiation	-1.913	0.679	-0.958	-1.463	-1.807	0.539
Hippo signaling pathway	0.242	0.138	-0.22	-0.031	0.313	0.237
Hippo signaling pathway - multiple species	-0.39	-0.944	-0.536	-0.575	0.034	-0.612
Focal adhesion	-1.111	-1.864	-2.14	-2.414	-1.836	-4.569
ECM-receptor interaction	-1.279	-2.376	-2.038	-2.546	-2.929	-5.079
Cell adhesion molecules (CAMs)	0.104	0.501	0.973	0.239	-0.098	0.539
Adherens junction	-1.724	-0.81	-0.521	-0.971	0.544	-1.259
Tight junction	-0.295	-1.085	-1.359	-0.956	-0.616	-1.957
Gap junction	-0.189	0.091	-0.666	-0.376	1.049	-0.203
Signaling pathways regulating pluripotency of stem cells	0.168	0.923	0.45	0.61	0.577	1.327
Complement and coagulation cascades	4.76	0.835	1.164	0.678	-0.347	-0.075
Platelet activation	0.628	0.524	-0.91	-1.03	0.529	-1.138
Antigen processing and presentation	0.169	-0.704	-0.258	1.798	0.286	1.104
Renin-angiotensin system	0	0	0	0	0	0
Toll-like receptor signaling pathway	-3.316	-0.402	-0.467	-0.815	-2.637	-0.757
NOD-like receptor signaling pathway	-0.759	0.422	0.628	0.705	-1.075	1.583
RIG-I-like receptor signaling pathway	0.147	1.464	0.662	0.18	-2.654	0.89
Cytosolic DNA-sensing pathway	0.147	1.464	0.662	0.18	-2.654	0.89
Jak-STAT signaling pathway	-1.501	1.649	-0.389	-0.985	-1.138	0.693
Hematopoietic cell lineage	-0.818	0.311	-1.572	-0.488	-0.623	-1.305
Natural killer cell mediated cytotoxicity	-1.315	-0.77	-1.746	-2.062	-2.595	-0.85
IL-17 signaling pathway	0.287	1.293	0.475	0.175	-0.972	0.788
Th1 and Th2 cell differentiation	-2.887	0.04	-0.797	-1.594	-3.423	0.165
Th17 cell differentiation	-2.265	0.953	-0.575	-0.833	-2.652	0.61
T cell receptor signaling pathway	0.072	0.34	-0.425	-0.338	-2.047	-0.116
B cell receptor signaling pathway	-0.14	0.803	-0.043	0.229	-1.727	0.619
Fc epsilon RI signaling pathway	0.243	0.602	0.316	0.402	0.52	0.754
Fc gamma R-mediated phagocytosis	-0.622	-1.434	-1.541	-0.376	-0.721	-1.465
TNF signaling pathway	-0.733	-0.527	-0.806	0.126	-0.819	0.405
Leukocyte transendothelial migration	1.135	0.106	0.179	-0.903	0.388	-0.536
Intestinal immune network for IgA production	0	0	0	0	0	0
Circadian rhythm	-1.001	-1.64	-0.619	-0.585	-1.158	-0.562
Circadian entrainment	-1.03	0.226	0.137	-1.227	-0.897	0.343
Long-term potentiation	-0.411	-0.387	-0.641	-0.265	0.684	-0.167
Synaptic vesicle cycle	1.455	1.902	-1.772	1.664	0.795	1.266
Neurotrophin signaling pathway	0.051	-0.116	-0.44	-0.201	0.38	0.188
Retrograde endocannabinoid signaling	-1.06	-0.33	0.297	-1.225	-0.515	-0.386
Glutamatergic synapse	-0.667	0.409	0.763	-1.114	-0.393	0.488
Cholinergic synapse	-1.455	-0.527	-0.856	-1.604	-0.572	-0.553
Serotonergic synapse	-0.734	0.108	0.481	-1.135	-1.048	-0.078
GABAergic synapse	-0.967	0.294	-0.078	-1.097	-0.921	0.264
Dopaminergic synapse	-0.525	-0.378	0.136	-1.734	-0.71	-0.114
Long-term depression	-0.703	1.013	-0.885	-0.904	-0.714	0.252
Olfactory transduction	0.366	0	0	0.364	0.675	0.651
Taste transduction	0	0	0	0	0	0
Phototransduction	1.001	1.169	0.651	0.64	1.302	1.489
Inflammatory mediator regulation of TRP channels	0.372	-0.081	1.081	0.029	-0.013	-0.186
Regulation of actin cytoskeleton	0.804	-0.805	-1.706	-1.672	-0.491	-2.475
Insulin signaling pathway	-0.708	-0.568	-0.814	-0.318	0.049	-0.148
Insulin secretion	0.393	0	0.397	0.319	2.132	0.554
GnRH signaling pathway	0.428	0.345	0.515	0.711	1.44	0.884
Ovarian steroidogenesis	1.674	2.202	2.567	1.308	0.863	1.972
Progesterone-mediated oocyte maturation	-2.055	-1.413	-1.698	-2.189	-1.99	-2.539
Estrogen signaling pathway	-0.828	-0.446	-0.44	-0.646	0.496	0.188
Melanogenesis	-0.99	0.469	-0.503	-0.905	-1.098	0.388
Prolactin signaling pathway	-4.354	-0.756	-0.546	-1.075	-1.037	-1.142
Thyroid hormone synthesis	0.393	0	0.397	0.319	2.132	0.554
Thyroid hormone signaling pathway	-3.53	-0.691	-0.663	-1.467	-1.141	-1.488
Adipocytokine signaling pathway	-0.768	0.693	-0.848	-0.24	-2.059	0.568
Oxytocin signaling pathway	-1.216	-0.839	-0.601	-1.72	-0.984	-0.763
Glucagon signaling pathway	-0.656	-1.716	-0.842	0.066	0.438	-0.664
Regulation of lipolysis in adipocytes	0.29	-0.01	0.192	0.123	0.531	0
Renin secretion	-0.93	-0.613	-1.71	0.963	-0.83	1.146
Aldosterone synthesis and secretion	0.364	0.469	-0.417	-0.032	0.991	-0.214
Type II diabetes mellitus	-0.193	-0.522	-0.339	-0.141	0.082	-0.323
Insulin resistance	-0.217	-1.065	1.287	0.833	-1.674	-0.14
Non-alcoholic fatty liver disease (NAFLD)	0.868	0.862	-0.249	0.729	1.262	1.252
AGE-RAGE signaling pathway in diabetic complications	-1.012	-1.337	0.068	-0.324	-2.16	-2.825
Type I diabetes mellitus	-0.186	-0.678	-0.228	-1.435	-1.73	-0.444
Maturity onset diabetes of the young	0	0	0	0	0	0
Aldosterone-regulated sodium reabsorption	0.742	1.23	0.521	1.149	1.151	1.515
Endocrine and other factor-regulated calcium reabsorption	-0.854	-1.768	-1.481	-0.424	-1.838	-1.516
Vasopressin-regulated water reabsorption	-0.854	-0.602	-0.914	-0.977	-0.44	-1.161
Proximal tubule bicarbonate reclamation	-0.365	-0.603	-0.557	-0.547	-0.358	-1.007
Collecting duct acid secretion	0.826	0.824	0.279	1.049	0.871	0.952
Salivary secretion	0.528	0.901	0.656	1.922	1.063	1.13
Gastric acid secretion	-0.821	-0.332	-0.368	-0.453	0	-0.601
Pancreatic secretion	-0.406	-0.537	-0.245	-1.229	-0.504	-0.986
Carbohydrate digestion and absorption	0.239	-0.046	0.235	0.513	0.582	0.613
Protein digestion and absorption	1.269	0	0	0.513	2.188	1.4
Fat digestion and absorption	1.092	0.727	0.908	0.789	0.736	1.684
Bile secretion	0.847	0.87	1.344	0.91	1.22	1.678
Vitamin digestion and absorption	0	0	0	0	0	0
Mineral absorption	-0.654	-0.365	0.064	0.364	0.879	-0.272
Alzheimer's disease	-0.019	-0.353	-0.432	-0.84	-0.543	-1.328
Parkinson's disease	0.387	-0.025	-0.135	0.5	-0.451	0.923
Amyotrophic lateral sclerosis (ALS)	-1.371	-0.618	-1.569	-0.18	-0.141	-0.117
Huntington's disease	0.437	0.365	-0.126	0.398	0.814	0.484
Prion diseases	-0.567	-0.489	-1.596	-0.2	-0.191	-0.486
Cocaine addiction	0.948	0.862	0.666	0.815	2.251	1.348
Amphetamine addiction	0.439	0.059	0.344	0.542	1.828	0.588
Morphine addiction	-1.124	-0.352	-0.587	-1.433	-0.84	-0.021
Nicotine addiction	0	0	0	0	0	0
Alcoholism	-0.71	-0.084	0.299	-0.927	-0.132	0.105
Bacterial invasion of epithelial cells	0.589	-1.949	-1.174	1.023	-2.824	-3.576
Vibrio cholerae infection	0.826	0.824	0.279	1.049	0.871	0.952
Epithelial cell signaling in Helicobacter pylori infection	0.625	1.077	0.065	0.897	-1.214	0.608
Pathogenic Escherichia coli infection	-0.038	-0.349	-0.575	-0.772	1.164	-0.676
Shigellosis	-0.375	0.007	-0.713	-1.235	-2.414	-0.936
Salmonella infection	-0.642	-0.712	-2.633	-2.471	-2.362	-1.004
Pertussis	0.081	-0.635	-1.26	-1.561	-0.593	-1.675
Legionellosis	0.133	-0.392	-0.359	-0.584	-0.113	0.605
Leishmaniasis	-1.542	-0.049	-0.809	-1.793	-1.346	0.244
Chagas disease (American trypanosomiasis)	-1.39	0.23	-1.184	-2.469	-4.383	-0.08
African trypanosomiasis	-0.746	-0.494	-0.568	-0.643	-0.59	-0.955
Malaria	-1.181	-0.855	-0.01	-1.047	-0.575	-1.438
Toxoplasmosis	-1.935	0.448	-0.845	-2.199	-2.795	0.209
Amoebiasis	2.54	-1.466	0.43	-0.706	-1.908	-2.834
Staphylococcus aureus infection	-0.746	-0.494	-0.568	-0.643	-0.59	-0.955
Tuberculosis	-2.741	-0.435	-1.798	-2.755	-1.989	-1.002
Hepatitis C	-0.574	0.95	0.198	0.327	-1.234	0.765
Hepatitis B	-2.311	-0.729	-0.817	-1.368	-2.431	-1.51
Measles	-1.25	-0.528	-0.612	-0.961	-0.873	0.567
Influenza A	-1.988	-0.05	-1.013	-0.662	-0.975	0.403
Human T-cell leukemia virus 1 infection	-1.362	-0.274	-0.366	-0.955	-2.069	-1.65
Kaposi's sarcoma-associated herpesvirus infection	-2.651	-0.647	-1.347	-1.697	-3.186	-0.929
Herpes simplex infection	-2.631	-1.548	-0.259	-1.919	-2.398	-0.99
Epstein-Barr virus infection	-1.835	-0.601	0.685	-0.568	-2.823	-1.248
Pathways in cancer	-0.856	1.438	-1.669	-0.856	-1.398	-0.475
Transcriptional misregulation in cancer	0.984	1.57	0.964	1.23	0.898	1.772
Viral carcinogenesis	0.292	-0.996	1.468	-1.337	-1.11	-1.294
Chemical carcinogenesis	0.949	0.519	-0.313	0.228	0.941	1.206
Proteoglycans in cancer	-0.962	-1.217	-1.846	-1.206	0.344	-2.956
MicroRNAs in cancer	-2.212	-1.227	-2.095	-1.988	-0.086	-3.346
Colorectal cancer	-0.408	-0.438	-1.866	-1.323	-0.542	-1.259
Renal cell carcinoma	-1.075	0.088	-1.377	-0.392	-0.178	-0.568
Pancreatic cancer	-3.206	-0.109	-0.886	-0.689	-1.175	-1.085
Endometrial cancer	-3.202	-0.532	-1.666	-0.486	0.45	-1.142
Glioma	0.182	0.165	-0.987	-0.967	-1.271	-1.22
Prostate cancer	-0.651	1.197	-0.266	-0.023	-0.558	0.333
Thyroid cancer	-0.312	0.185	-1.945	-0.674	-0.291	-0.554
Basal cell carcinoma	0.367	0.87	0.314	0.574	0.944	1.006
Melanoma	1.01	0.903	-0.149	-0.227	-0.106	0.137
Bladder cancer	-2.245	-1.186	-1.417	-1.009	-0.488	-2.358
Chronic myeloid leukemia	-0.333	-0.005	-0.615	-0.916	-2.899	-0.813
Acute myeloid leukemia	-0.214	0.71	-0.146	-0.189	-1.766	0.079
Small cell lung cancer	1.045	-0.753	-0.262	-1.127	-3.659	-2.566
Non-small cell lung cancer	-2.336	-0.852	-1.871	-0.99	-0.371	-2.036
Breast cancer	-0.314	0.909	-0.135	0.684	1.362	1.041
Central carbon metabolism in cancer	-1.737	0.268	-1.16	-0.065	0.405	-0.452
Choline metabolism in cancer	0.068	0.738	-0.034	-0.12	0.363	0.051
Asthma	0	0	0	0	0	0
Autoimmune thyroid disease	0.291	-0.48	1.109	0.191	-0.797	0.309
Inflammatory bowel disease (IBD)	-3.066	-0.822	-1.04	-1.706	-2.1	-0.092
Systemic lupus erythematosus	1.884	-0.396	1.279	-0.738	0.111	-0.06
Rheumatoid arthritis	0.261	0.218	-0.108	0.655	0.437	0.356
Allograft rejection	0.291	-0.48	1.109	0.191	-0.797	0.309
Graft-versus-host disease	0.291	-0.48	1.109	0.191	-0.797	0.309
Primary immunodeficiency	-0.61	0.189	-0.208	-1.174	-2.838	-0.94
Hypertrophic cardiomyopathy (HCM)	-1.512	-1.823	-1.725	-2.432	-1.613	-2.624
Arrhythmogenic right ventricular cardiomyopathy (ARVC)	-0.962	-1.362	-1.534	-2.275	-1.337	-2.597
Dilated cardiomyopathy (DCM)	-0.887	-1.129	-1.369	-2.192	-1.315	-2.443
Viral myocarditis	-0.125	-0.429	0.423	-0.387	-0.476	-0.382
Fluid shear stress and atherosclerosis	0.585	1.312	0.722	0.273	-0.15	0.744

## Sheet: Tables S5
Module z-score values
GeneSet	A	B	C	D	E	Merge
Nuclear alteration	0.56	0	0.383	0	0.584	0
Fibrogenesis	0	2.197	0	0	0.217	0
Cellular infiltration	0	2.412	0	0	0	0
Anisonucleosis	0.589	1.49	0.11	0	1.102	0.07
Single cell necrosis	1.4	0.598	0	0	0.077	0.86
Cellular foci	0	0.929	0	0	0	0
Oval cell proliferation	0	0.148	1.419	0	0.378	0
Bile duct proliferation	2.588	0.933	1.467	0.789	0	0
Granular degeneration	0.385	0	0	1.823	0	0
Hematopoiesis	0	0	0	0	0	0
Cytoplasmic alteration	0.221	0	0	0	0	0.1
